# Supplementary material for: A ‘torn bag mechanism’ of small extracellular vesicle release via limiting membrane rupture of en bloc released amphisomes (amphiectosomes)
Source: eLife. 2025 Feb 7;13:RP95828. doi: 10.7554/eLife.95828 (PMC11805505; doi:10.7554/eLife.95828)
Supplement: Figure 2—figure supplement 2—source data 1. [file elife-95828-fig2-figsupp2-data1.xlsx]

## Sheet: Munka1
TSG101-CD63	ALIX-CD81	LC3B- CD81	LC3B- CD81	LC3B- CD63
23.59	38.51	15.68	0	1.75
42.23	47.51	2.54	0	3.65
28.24	60.11	1.94	0	12.5
36.61	42.54	5.28	12.8	0
48.14	38.29	12.23	3.61	11.39
30.77	44.59	9.85	0	0.7
26.44	42.71	7.84	5.88	0
56.25	42.44	4	0.52	3.53
51.85	32.91	2.52	11.11	2.54
48.36	50.29	4.75	0.67	4.82
49.64	38.98	2.06	0
46.86	36.56	5.34	0.43
40.07	41.47	6.16	14.69
49.51	54.85
46.89	41.23
56.34	49.84
38.39
