# Supplementary material for: A ‘torn bag mechanism’ of small extracellular vesicle release via limiting membrane rupture of en bloc released amphisomes (amphiectosomes)
Source: eLife. 2025 Feb 7;13:RP95828. doi: 10.7554/eLife.95828 (PMC11805505; doi:10.7554/eLife.95828)
Supplement: Figure 2—figure supplement 6—source data 1. [file elife-95828-fig2-figsupp6-data1.xlsx]

## Sheet: Figure 2-figure supplement 6Q
MVB	Amphisome	Amphiectosome
42.562	222.427	128.287
43.165	67.753	98.204
54.448	43.555	78.034
53.245	57.139	44.625
51.228	61.135	70.849
41.174	91.053	65.539
52.07	46.311	66.466
47.615	46.677	99.688
68.967	65.494	109.995
64.802	52.595	112.742
34.844	71.902	87.914
58.165	55.762	73.582
40.034	151.567	47.599
47.517	60.989	43.96
54.161	104.693	134.631
53.133	69.748	100.973
51.35	60.462	103.257
59.227	57.901	68.42
40.63	70.394	48.979
55.14	36.76	90.626
52.396	47.905	77.011
49.411	108.614	55.682
45.507	85.895	97.018
57.929	159.009	93.164
39.966	123.813	102.366
44.586	452.078	110.505
47.759	214.858	100.808
49.194	132.544	93.075
42.05	160.754	61.224
48.368	108.6	99.489
58.678	52.708	80.67
61.871	86.926	49.532
68.961	78.416	43.292
50.523	60.24	93.417
49.557	181	93.103
44.867	72.4	63.826
56.197	49.594	110.167
49.638	86.438	98.47
53.36	45.303	65.834
37.731	66.295	49.532
47.381	88.558	55.715
54.907	67.111	71.063
39.36	128.041	81.353
84.068	128.267	98.139
81.814	96.58	68.449
76.446	136.679	87.657
57.923	87.517	90.082
53.78	98.724	104.483
83.12	73.779	82.366
45.794	61.125	73.722
47.729	74.991	63.107
43.212	61.975	133.712
47.579	57.332	88.983
50.393	66.002	89.246
57.851	47.703	88.983
40.959	58.389	117.325
41.274	87.084	65.939
50.393	73.527	64.284
58.247	62.493	69.871
46.044	56.54	67.205
43.312	52.17	119.227
55.958	76.163	75.604
40.995	76.701	100.085
50.393	129.415	78.998
55.338	154.718	89.404
52.213	126.322	115.23
60.116	190.777	48.401
47.579	195.859	42.084
64.429	178.667	36.913
42.677	134.613	85.741
61.111	173.993	57.915
67.158	71.822	78.317
35.391	54.016	49.356
	58.339	72.767
	65.611	72.767
	70.738	71.185
	73.693	79.143
	72.915	54.87
	60.231	60.628
	79.018	78.294
	71.385	52.857
	70.347	56.971
	77.109	96.585
	91.188	66.973
	74.906	98.585
	67.79	84.068
	99.004	60.149
	78.269	98.898
	70.347	88.901
	49.872	58.583
	72.915	77.994
	284.651	112.718
	80.929	82.267
	138.7	36.543
	84.091	49.679
	58.758	54.395
	82.401	66.244
	50.064	62.018
	63.456	61.185
	62.968	71.267
	76.827	35.271
	63.859	103.634
	71.163	75.775
	50.32	67.874
	70.982	78.614
	284.827	94.701
	369.731	78.796
	218.707	33.994
	379.695	50.704
	245.274	48.986
	210.93	70.258
	75.673	83.439
	202.414	54.159
	146.942	56.983
	80.965	68.76
	91.468	47.116
	106.18	72.654
	178.99	59.001
	177.001	129.908
	52.059	93.899
	48.046	57.469
	96.489	90.373
	84.398	102.488
	71.87	78.511
	53.687	58.01
	225.441	55.703
	202.303	83.698
	76.927	45.313
	78.932	43.818
	63.131	49.149
	118.78	89.609
	60.002	68.207
	87.784	98.721
	35.116	53.1
	41.741	60.574
	65.402	46.983
	68.827	50.404
	34.288	46.938
		62.869
		53.879
		40.663
		40.199
		112.707
		67.346
		57.759
		77.711
		96.178
		52.03
		93.407
		154.094
		90.487
		109.299
		106.815
		71.137
		123.837
		95.01
		94.301
		109.33
		107.971
		86.117
		104.432
		60.976
		59.641
		80.31
		95.01
		112.118
		82.941
		127.889
		48.141
		130.465
		68.271
		90.349
		70.497
		57.412
		75.965
		54.893
		47.485
		75.89
		76.343
		71.203
		120.619
		55.955
		45.033
		85.551
		58.318
		46.631
		29.985
		59.198
		66.098
		56.415
		57.349
		76.587
		56.846
		61.693
		110.216
		25.422
		50.048
		59.319
		46.754
		63.324
		55.336
		32.733
		87.935
		66.596
		46.877
		110.177
		62.914
		120.987
		60.113
		40.676
		63.324
		51.852
		57.649
		51.239
		80.571
		55.413
		56.339
		60.184
		58.735
		52.567
		53.595
		67.496
		62.8
		55.336
		79.945
		40.992
		56.568
		69.136
		59.921
		42.675
		46.042
		31.251
		98.315
		45.792
		47.576
		33.556
		52.211
		38.087
		52.975
		53.219
		49.412
		44.358
		103.883
		91.681
		85.701
		62.611
		65.315
		118.894
		66.885
		50.135
		65.93
		50.479
		47.295
		57.825
		51.831
		64.068
		53.149
		44.143
		108.073
		61.215
		62.611
		72.031
		60.074
		52.823
		51.72
		72.031
		38.417
		51.942
		64.427
		54.435
		32.034
		37.505
		68.335
		54.752
		65.227
		64.872
		38.716
		83.865
		98.706
		37.505
		53.689
		47.295
		58.123
		63.797
		70.002
		76.306
		43.219
		51.831
		97.235
		53.689
		61.215
		83.244
		44.143
		70.002
		96.042
		84.89
		81.635
		65.93
		66.885
		60.742
		62.427
		68.671
		49.44
		54.857
		56.92
		42.547
		40.747
		48.26
		53.689
		102.375
		40.888
		40.888
		67.996
		72.906
		54.752
		70.002
		48.26
		82.618
		41.309
		111.228
		63.161
		96.162
		81.494
		111.228
		75.164
		110.186
		71.388
		50.479
		33.956
		36.572
		86.571
		44.273
		79.453
		32.994
		38.071
		75.162
		94.761
		138.789
		85.753
		60.636
		79.899
		84.144
		110.755
		99.358
		96.027
		69.394
		81.392
		82.148
		81.791
		48.508
		54.794
		62.84
		47.836
		45.56
		44.041
		54.2
		50.042
		41.955
		36.174
		45.01
		61.545
		54.184
		43.833
		41.257
		42.681
		39.425
		66.337
		82.332
		52.567
		56.141
		41.317
		50.191
		44.733
		48.251
		32.293
		51.947
		59.292
		40.464
		118.513
		48.371
		71.575
		54.138
		34.698
		42.212
		88.596
		60.661
		87.347
		74.946
		85.992
		52.59
		79.041
		70.196
		83.257
		96.567
		99.133
		148.21
		69.165
		108.058
		126.886
		84.676
		72.364
		85.873
		97.119
		204.426
		55.896
		55.682
		75.775
		67.874
		78.614
		94.701
		58.583
		67.496
		62.8
		55.336
		79.945
		40.992
		56.568
		69.136
		59.921
		42.675
		46.042
		31.251
		98.315
		45.792
		47.576
		33.556
		52.211
		38.087
		52.975
		53.219
		49.412
		44.358
		103.883
		91.681
		85.701
		62.611
		65.315
		118.894
		66.885
		50.135
		65.93
		50.479
		47.295
		57.825
		51.831
		64.068
		53.149
		44.143
		108.073
		61.215
		62.611
		72.031
		60.074
		52.823
		51.72
		72.031
		38.417
		51.942
		64.427
		54.435
		32.034
		37.505
		68.335
		54.752
		65.227
		64.872
		38.716
		83.865
		98.706
		37.505
		53.689
		47.295
		58.123
		63.797
		70.002
		76.306
		43.219
		51.831
		97.235
		53.689
		61.215
		83.244
		44.143
		70.002
		96.042
		84.89
		81.635
		65.93
		66.885
		60.742
		62.427
		68.671
		49.44
		54.857
		56.92
		42.547
		40.747
		48.26
		53.689
		102.375
		40.888
		40.888
		67.996
		72.906
		54.752
		70.002
		48.26
		82.618
		41.309
		111.228
		63.161
		96.162
		81.494
		111.228
		75.164
		110.186
		71.388
		50.479
		33.956
		36.572
		86.571
		44.273
		79.453
		32.994
		38.071
		75.162
		94.761
		138.789
		85.753
		60.636
		79.899
		84.144
		110.755
		99.358
		96.027
		69.394
		81.392
		82.148
		81.791
		48.508
		54.794
		62.84
		47.836
		45.56
		44.041
		54.2
		50.042
		41.955
		36.174
		45.01
		61.545
		54.184
		43.833
		41.257
		42.681
		39.425
		66.337
		82.332
		52.567
		56.141
		41.317
		50.191
		44.733
		48.251
		32.293
		51.947
		59.292
		40.464
		118.513
		48.371
		71.575
		54.138
		34.698
		42.212
		88.596
		60.661
		87.347
		74.946
		85.992
		52.59
		79.041
		70.196
		83.257
		96.567
		99.133
		148.21
		69.165
		108.058
		126.886
		84.676
		72.364
		85.873
		97.119
		204.426
		55.896

## Sheet: Figure 2-figure supplement 6R
Amphiectosome	LC3B-	LC3B+
128.287	80.522	94.523
98.204	96.08	73.533
78.034	88.069	73.815
44.625	45.647	71.282
70.849	78.961	78.112
65.539	74.948	50.414
66.466	69.903	205.812
99.688	58.604	52.716
109.995	61.968	107.079
112.742	63.584	69.162
87.914	118.401	95.341
73.582	70.101	99.796
47.599	85.95	71.871
43.96	73.126	107.186
134.631	68.857	93.08
100.973	77.829	70.791
103.257	77.414	96.728
68.42	84.87	70.015
48.979	73.268	78.78
90.626	67.896	42.886
77.011	81.702	71.637
75.775	63.729	78.885
97.018	77.547	91.468
93.164	53.848	73.839
102.366	55.741	96.269
110.505	60.728	95.219
100.808	76.831	108.16
93.075	57.049	113.525
61.224	51.931	31.608
99.489	74.454	42.57
80.67	61.426	45.116
49.532	58.189	68.402
43.292	55.013	40.823
93.417	80.679	114.218
93.103	65.212	87.091
63.826	50.922	60.547
110.167	66.542	53.843
98.47	68.656	54.491
65.834	65.353	57.078
49.532	51.641	48.692
55.715	42.44	84.378
71.063	44.254	111.655
81.353	34.983	56.357
98.139	50.737	55.987
68.449	41.634	90.115
87.657	34.395	59.963
90.082	31.982	67.123
104.483	62.17	61.659
82.366	56.34	54.082
73.722	57.033	73.01
63.107	42.44	59.281
133.712	39.443	71.911
88.983	42.849	78.28
89.246	56.815	80.405
88.983	56.141	40.954
117.325	53.717	103.511
65.939	54.96	68.348
64.284	37.518	59.78
69.871	40.843	70.075
67.205	50.203	44.041
119.227	56.293	70.134
75.604	47.074	69.073
100.085	77.872	65.974
78.998	41.946	49.279
89.404	33.158	60.626
115.23	58.53	38.112
48.401	71.198	48.159
42.084	70.325	65.988
36.913	43.626	43.923
85.741	51.577	68.564
57.915	39.811
78.317	41.673
49.356	34.459
72.767	51.513
72.767	62.769
71.185	51.768
79.143	44.282
54.87	42.067
60.628	82.049
78.294	52.291
52.857	37.77
56.971	53.446
96.585	53.952
66.973	57.561
98.585	45.549
84.068	47.533
60.149	73.481
98.898	72.033
88.901	52.99
55.682	152.551
77.994	52.835
112.718	53.986
82.267	45.321
58.583	74.494
49.679	44.946
54.395	31.782
66.244	48.887
62.018	56.481
61.185	52.495
71.267	38.753
35.271	56.408
103.634
36.543
67.874
78.614
94.701
78.796
33.994
50.704
48.986
70.258
83.439
54.159
56.983
68.76
47.116
72.654
59.001
129.908
93.899
57.469
90.373
102.488
78.511
58.01
55.703
83.698
45.313
43.818
49.149
89.609
68.207
98.721
53.1
60.574
46.983
50.404
46.938
62.869
53.879
40.663
40.199
112.707
67.346
57.759
77.711
96.178
52.03
93.407
154.094
90.487
109.299
106.815
71.137
123.837
95.01
94.301
109.33
107.971
86.117
104.432
60.976
59.641
80.31
95.01
112.118
82.941
127.889
48.141
130.465
68.271
90.349
70.497
57.412
75.965
54.893
47.485
75.89
76.343
71.203
120.619
55.955
45.033
85.551
58.318
46.631
29.985
59.198
66.098
56.415
57.349
76.587
56.846
61.693
110.216
25.422
50.048
59.319
46.754
63.324
55.336
32.733
87.935
66.596
46.877
110.177
62.914
120.987
60.113
40.676
63.324
51.852
57.649
51.239
80.571
55.413
56.339
60.184
58.735
52.567
53.595
67.496
62.8
55.336
79.945
40.992
56.568
69.136
59.921
42.675
46.042
31.251
98.315
45.792
47.576
33.556
52.211
38.087
52.975
53.219
49.412
44.358
103.883
91.681
85.701
62.611
65.315
118.894
66.885
50.135
65.93
50.479
47.295
57.825
51.831
64.068
53.149
44.143
108.073
61.215
62.611
72.031
60.074
52.823
51.72
72.031
38.417
51.942
64.427
54.435
32.034
37.505
68.335
54.752
65.227
64.872
38.716
83.865
98.706
37.505
53.689
47.295
58.123
63.797
70.002
76.306
43.219
51.831
97.235
53.689
61.215
83.244
44.143
70.002
96.042
84.89
81.635
65.93
66.885
60.742
62.427
68.671
49.44
54.857
56.92
42.547
40.747
48.26
53.689
102.375
40.888
40.888
67.996
72.906
54.752
70.002
48.26
82.618
41.309
111.228
63.161
96.162
81.494
111.228
75.164
110.186
71.388
50.479
33.956
36.572
86.571
44.273
79.453
32.994
38.071
75.162
94.761
138.789
85.753
60.636
79.899
84.144
110.755
99.358
96.027
69.394
81.392
82.148
81.791
48.508
54.794
62.84
47.836
45.56
44.041
54.2
50.042
41.955
36.174
45.01
61.545
54.184
43.833
41.257
42.681
39.425
66.337
82.332
52.567
56.141
41.317
50.191
44.733
48.251
32.293
51.947
59.292
40.464
118.513
48.371
71.575
54.138
34.698
42.212
88.596
60.661
87.347
74.946
85.992
52.59
79.041
70.196
83.257
96.567
99.133
148.21
69.165
108.058
126.886
84.676
72.364
85.873
97.119
204.426
55.896
55.682
75.775
67.874
78.614
94.701
58.583
67.496
62.8
55.336
79.945
40.992
56.568
69.136
59.921
42.675
46.042
31.251
98.315
45.792
47.576
33.556
52.211
38.087
52.975
53.219
49.412
44.358
103.883
91.681
85.701
62.611
65.315
118.894
66.885
50.135
65.93
50.479
47.295
57.825
51.831
64.068
53.149
44.143
108.073
61.215
62.611
72.031
60.074
52.823
51.72
72.031
38.417
51.942
64.427
54.435
32.034
37.505
68.335
54.752
65.227
64.872
38.716
83.865
98.706
37.505
53.689
47.295
58.123
63.797
70.002
76.306
43.219
51.831
97.235
53.689
61.215
83.244
44.143
70.002
96.042
84.89
81.635
65.93
66.885
60.742
62.427
68.671
49.44
54.857
56.92
42.547
40.747
48.26
53.689
102.375
40.888
40.888
67.996
72.906
54.752
70.002
48.26
82.618
41.309
111.228
63.161
96.162
81.494
111.228
75.164
110.186
71.388
50.479
33.956
36.572
86.571
44.273
79.453
32.994
38.071
75.162
94.761
138.789
85.753
60.636
79.899
84.144
110.755
99.358
96.027
69.394
81.392
82.148
81.791
48.508
54.794
62.84
47.836
45.56
44.041
54.2
50.042
41.955
36.174
45.01
61.545
54.184
43.833
41.257
42.681
39.425
66.337
82.332
52.567
56.141
41.317
50.191
44.733
48.251
32.293
51.947
59.292
40.464
118.513
48.371
71.575
54.138
34.698
42.212
88.596
60.661
87.347
74.946
85.992
52.59
79.041
70.196
83.257
96.567
99.133
148.21
69.165
108.058
126.886
84.676
72.364
85.873
97.119
204.426
55.896
