# Supplementary material for: A ‘torn bag mechanism’ of small extracellular vesicle release via limiting membrane rupture of en bloc released amphisomes (amphiectosomes)
Source: eLife. 2025 Feb 7;13:RP95828. doi: 10.7554/eLife.95828 (PMC11805505; doi:10.7554/eLife.95828)
Supplement: Figure 2—source data 1. [file elife-95828-fig2-data1.xlsx]

## Sheet: Figure 2G
	GFP	CD63	ALIX
0	0	0.121464	0.000413187
0.00682	0	0.11868	0.00040941
0.013639	0	0.115105	0.00045303
0.020459	0	0.110725	0.000492037
0.027278	0	0.104974	0.00054588
0.034098	0	0.0991905	0.00054588
0.040917	0	0.0939886	0.000591104
0.047737	0	0.0902316	0.000603377
0.054557	0	0.0877547	0.000596388
0.061376	0	0.0865263	0.00054588
0.068196	0	0.0851306	0.00054588
0.075015	0	0.0832746	0.000577462
0.081835	0	0.0808212	0.000621891
0.088655	0	0.0779657	0.000667667
0.095474	0	0.075008	0.000720204
0.102294	0	0.0719824	0.000814781
0.109113	0	0.0690996	0.000792279
0.115933	0	0.06626	0.000775357
0.122752	0	0.0635272	0.00072935
0.129572	0	0.061161	0.00068235
0.136392	0	0.059138	0.00068235
0.143211	0	0.0578071	0.000656008
0.150031	0	0.057078	0.000614295
0.15685	0	0.0564627	0.000592706
0.16367	0	0.055381	0.000553458
0.17049	0	0.053551	0.00054588
0.177309	0	0.0506951	0.000546344
0.184129	0	0.0476819	0.00059536
0.190948	0	0.04523	0.000614115
0.197768	0	0.0438123	0.000619081
0.204587	0	0.0441164	0.000647868
0.211407	0	0.0455349	0.000629131
0.218227	0	0.0477634	0.000621089
0.225046	0	0.0498171	0.000567011
0.231866	0	0.0513423	0.000512197
0.238685	0	0.0511454	0.000439722
0.245505	0	0.049757	0.000401393
0.252325	0	0.0470882	0.000407143
0.259144	0	0.0438587	0.00040941
0.265964	0	0.0407498	0.00044935
0.272783	0	0.0381641	0.000490189
0.279603	0	0.0362046	0.00054588
0.286422	0	0.0348558	0.000545027
0.293242	0	0.0336222	0.000534313
0.300062	0	0.032305	0.000482676
0.306881	0	0.0308351	0.000444869
0.313701	0	0.0293829	0.00040941
0.32052	0	0.0282639	0.000445011
0.32734	0	0.0278463	0.000484118
0.33416	0	0.0281847	0.000524231
0.340979	0	0.0290298	0.000553792
0.347799	0	0.0299152	0.000541878
0.354618	0	0.0303545	0.000538369
0.361438	0	0.0302314	0.000545403
0.368257	0	0.0289981	0.000522591
0.375077	0	0.0272543	0.000557188
0.381897	0	0.0252354	0.000596798
0.388716	0	0.0234092	0.000614115
0.395536	0	0.0218641	0.000613569
0.402355	0	0.0208672	0.000614115
0.409175	0	0.0201684	0.000563818
0.415995	0	0.0197288	0.00054588
0.422814	0	0.0193274	0.00056973
0.429634	0	0.0189283	0.000614115
0.436453	0	0.0185231	0.00064024
0.443273	0	0.0181934	0.000681944
0.450092	0	0.0176882	0.00068235
0.456912	0	0.0171283	0.00068235
0.463732	0	0.0164227	0.000665663
0.470551	0	0.0156279	0.000634087
0.477371	0	0.0145814	0.000673697
0.48419	0	0.0135677	0.000656552
0.49101	0	0.012618	0.00068235
0.49783	0	0.0118806	0.00068235
0.504649	0	0.0113379	0.000695668
0.511469	0	0.011146	0.000735278
0.518288	0	0.0113133	0.00069796
0.525108	0	0.0116996	0.00068235
0.531927	0	0.0122178	0.000633787
0.538747	0	0.0128486	0.000592525
0.545567	0	0.0135128	0.000497247
0.552386	0	0.0142043	0.000419618
0.559206	0	0.0149423	0.000371261
0.566025	0	0.015514	0.000341175
0.572845	0	0.0160295	0.000341175
0.579665	0	0.0162797	0.000345681
0.586484	0	0.0162694	0.000405379
0.593304	0	0.0161934	0.000447133
0.600123	0	0.0160092	0.000499627
0.606943	0	0.0158019	0.000539237
0.613762	0	0.0154601	0.00054588
0.620582	0	0.0148381	0.000550185
0.627402	0	0.014193	0.00055359
0.634221	0	0.0134152	0.00054588
0.641041	0	0.0127024	0.00054588
0.64786	0	0.0120027	0.000501
0.65468	0	0.0114253	0.000411721
0.6615	0	0.010942	0.000372111
0.668319	0	0.010682	0.0003325
0.675139	0	0.0106474	0.000282208
0.681958	0	0.0108788	0.000248971
0.688778	0	0.0114253	0.000204705
0.695597	0	0.0123098	0.000234828
0.702417	0	0.0132416	0.00027294
0.709237	0	0.0140996	0.00027294
0.716056	0	0.0147451	0.000309719
0.722876	0	0.0150769	0.000341175
0.729695	0	0.0150494	0.000341175
0.736515	0	0.0150312	0.000341175
0.743335	0	0.0149572	0.000341175
0.750154	0	0.0150182	0.000341175
0.756974	0	0.0151456	0.000341175
0.763793	0	0.0151972	0.000323837
0.770613	0	0.0150712	0.000284226
0.777432	0	0.01472	0.00027294
0.784252	0	0.0141841	0.00027294
0.791072	0	0.0135987	0.000323953
0.797891	0	0.0131118	0.000356218
0.804711	0	0.0128157	0.000411235
0.81153	0	0.0128127	0.000467555
0.81835	0	0.012962	0.000477645
0.825169	0	0.0130566	0.000477645
0.831989	0	0.0130751	0.000473614
0.838809	0	0.0129222	0.000434004
0.845628	0	0.0127328	0.000394393
0.852448	0	0.0124593	0.000354783
0.859267	0	0.012391	0.000315173
0.866087	0	0.0123103	0.000274569
0.872907	0	0.0121895	0.00027294
0.879726	0	0.0121291	0.00027294
0.886546	0	0.0117843	0.00027294
0.893365	0	0.0113333	0.00027294
0.900185	0	0.010778	0.000304191
0.907004	0	0.0102119	0.000341175
0.913824	0	0.00970442	0.000348849
0.920644	0	0.00923155	0.000406866
0.927463	0	0.00899662	0.00040941
0.934283	0	0.00877688	0.00040941
0.941102	0	0.00847062	0.000385323
0.947922	0	0.00795209	0.000341175
0.954742	0	0.0073496	0.000341706
0.961561	0	0.0066292	0.000291389
0.968381	0	0.0060747	0.000290455
0.9752	0	0.00574258	0.000243451
0.98202	0	0.00568764	0.000204705
0.988839	0	0.00572653	0.000200349
0.995659	0	0.00576542	0.00014468
1.00248	0	0.00583307	0.00013647
1.0093	0	0.00573358	0.000171362
1.01612	0	0.00555618	0.00022703
1.02294	0	0.00534246	0.000282699
1.02976	0	0.00501643	0.000338367
1.03658	0	0.00474021	0.000333887
1.0434	0	0.00444379	0.000339652
1.05022	0	0.00425193	0.000351295
1.05703	0	0.00405216	0.000356336
1.06385	0	0.00373668	0.000412005
1.07067	0	0.00357333	0.000441983
1.07749	0	0.00348216	0.000456076
1.08431	0	0.0034617	0.000492968
1.09113	0	0.00350647	0.000469594
1.09795	0	0.00366075	0.000429983
1.10477	0	0.00374363	0.000391648
1.11159	0	0.00390627	0.000350763
1.11841	0	0.0039456	0.00027262
1.12523	0	0.0038603	0.000204705
1.13205	0	0.00389919	0.000204705
1.13887	0	0.0039068	0.000192473
1.14569	0	0.00392274	0.000195765
1.15251	0	0.00401586	0.000204705
1.15933	0	0.00404889	0.000233657
1.16615	0	0.00423711	0.00027294
1.17297	0	0.00432553	0.000278669
1.17979	0	0.00455627	0.00031828
1.18661	0	0.00466753	0.000341175
1.19343	0	0.00468995	0.000304404
1.20025	0	0.00467034	0.000290814
1.20707	0	0.00459887	0.00027294
1.21389	0	0.00446532	0.00027294
1.2207	0	0.0043536	0.000281011
1.22752	0	0.00431471	0.000334085
1.23434	0	0.0042537	0.000350307
1.24116	0	0.0041313	0.000403725
1.24798	0	0.0041313	0.000443816
1.2548	0	0.00413228	0.000481053
1.26162	0	0.0041313	0.000520663
1.26844	0	0.00421609	0.00051087
1.27526	0	0.00433957	0.000455202
1.28208	0	0.00452326	0.000399533
1.2889	0	0.00461919	0.000343865
1.29572	0	0.00479474	0.000341175
1.30254	0	0.00489782	0.000345759
1.30936	0	0.0049782	0.000388525
1.31618	0	0.00505841	0.000443414
1.323	0	0.00533175	0.00053598
1.32982	0	0.00564027	0.000575591
1.33664	0	0.00605799	0.000614844
1.34346	0	0.00635652	0.000634981
1.35028	0	0.00654861	0.000593433
1.3571	0	0.00664449	0.000537764
1.36392	0	0.00653041	0.000482096
1.37074	0	0.00640621	0.000426427
1.37756	0	0.00659629	0.000390127
1.38437	0	0.00698298	0.000365188
1.39119	0	0.007609	0.000373302
1.39801	0	0.00834841	0.000410361
1.40483	0	0.00883271	0.00046603
1.41165	0	0.00898747	0.000494309
1.41847	0	0.00877547	0.000509797
1.42529	0	0.00822265	0.000518146
1.43211	0	0.00768282	0.00053613
1.43893	0	0.00736667	0.00049652
1.44575	0	0.00724345	0.000477645
1.45257	0	0.00744976	0.000445021
1.45939	0	0.00768788	0.00040941
1.46621	0	0.00795436	0.00040941
1.47303	0	0.00809416	0.00040941
1.47985	0	0.00825762	0.00040941
1.48667	0	0.00851688	0.00040941
1.49349	0	0.0087258	0.00040941
1.50031	0	0.00895654	0.00040941
1.50713	0	0.00900154	0.00040941
1.51395	0	0.00888763	0.000410278
1.52077	0	0.00861614	0.00040941
1.52759	0	0.00835618	0.000427823
1.53441	0	0.00807748	0.000467434
1.54123	0	0.00781255	0.000507044
1.54804	0	0.00742884	0.000546654
1.55486	0	0.00696902	0.000639361
1.56168	0	0.00649616	0.00069411
1.5685	0	0.00623115	0.000761684
1.57532	0	0.0062937	0.000823952
1.58214	0	0.00667231	0.000881419
1.58896	0	0.00752011	0.000915973
1.59578	0	0.00847083	0.000958727
1.6026	0	0.00938133	0.00101151
1.60942	0	0.0100106	0.00103962
1.61624	0	0.0101644	0.00107099
1.62306	0	0.00992453	0.00105493
1.62988	0	0.00940749	0.000987541
1.6367	0	0.00895846	0.000915814
1.64352	0	0.00852453	0.00087029
1.65034	0	0.00829351	0.000864034
1.65716	0	0.00838616	0.000927902
1.66398	0	0.00869468	0.00100712
1.6708	0	0.00921716	0.00114159
1.67762	0	0.00994166	0.0012654
1.68444	0	0.0106761	0.00136222
1.69126	0	0.0114121	0.00137069
1.69808	0	0.012068	0.00130733
1.7049	0	0.0125439	0.00125366
1.71172	0	0.0127899	0.00122613
1.71853	0	0.0126258	0.00122823
1.72535	0	0.0123107	0.00125786
1.73217	0	0.0119401	0.00136379
1.73899	0	0.011726	0.00149275
1.74581	0	0.0117711	0.00160783
1.75263	0	0.0120155	0.00166748
1.75945	0	0.0122701	0.00168825
1.76627	0	0.0126603	0.00163016
1.77309	0	0.0130173	0.00151556
1.77991	0	0.0135069	0.00145336
1.78673	0	0.0142872	0.00145537
1.79355	0	0.0154169	0.00154034
1.80037	0	0.0171993	0.00173482
1.80719	0	0.0192191	0.00199063
1.81401	0	0.02192	0.00231608
1.82083	0	0.0249361	0.00260088
1.82765	0	0.0288178	0.00281978
1.83447	0	0.033394	0.00297293
1.84129	0	0.038543	0.00313145
1.84811	0	0.0443052	0.00328449
1.85493	0	0.051374	0.00363862
1.86175	0	0.059827	0.0041532
1.86857	0	0.0695999	0.00477758
1.87539	0	0.0805894	0.00546723
1.8822	0	0.0924451	0.00606051
1.88902	0	0.105031	0.00654664
1.89584	0	0.119018	0.00689208
1.90266	0	0.134837	0.00716952
1.90948	0	0.15287	0.00740843
1.9163	0	0.172686	0.00761025
1.92312	0	0.193212	0.00783935
1.92994	0.00024558	0.214544	0.00817116
1.93676	0.00801501	0.237759	0.008713
1.94358	0.0264489	0.265836	0.00952904
1.9504	0.0471728	0.299853	0.0106955
1.95722	0.07108	0.339862	0.0123474
1.96404	0.099927	0.38272	0.0144465
1.97086	0.132895	0.424781	0.0168931
1.97768	0.169825	0.466236	0.0228764
1.9845	0.209623	0.507665	0.0332498
1.99132	0.251941	0.553585	0.0454838
1.99814	0.296265	0.606792	0.0590285
2.00496	0.343804	0.66507	0.0729287
2.01178	0.395457	0.723677	0.0871822
2.0186	0.449493	0.775059	0.101828
2.02542	0.505845	0.813407	0.116613
2.03224	0.5657	0.839311	0.131957
2.03905	0.62667	0.859697	0.148239
2.04588	0.694389	0.883771	0.165373
2.05269	0.767614	0.914538	0.182325
2.05951	0.837756	0.951168	0.198577
2.06633	0.900161	0.983628	0.211644
2.07315	0.947081	1	0.22009
2.07997	0.98121	0.998606	0.224839
2.08679	1	0.983135	0.227403
2.09361	0.999414	0.960073	0.229105
2.10043	0.982421	0.936329	0.231506
2.10725	0.939674	0.913925	0.236282
2.11407	0.884097	0.891305	0.24321
2.12089	0.817641	0.866455	0.251366
2.12771	0.749362	0.836946	0.259322
2.13453	0.681672	0.804187	0.266006
2.14135	0.624088	0.764607	0.269693
2.14817	0.576182	0.724096	0.271073
2.15499	0.533881	0.679981	0.269958
2.16181	0.493647	0.637076	0.268393
2.16863	0.457609	0.596002	0.26729
2.17545	0.422333	0.557295	0.267214
2.18227	0.388998	0.521007	0.26794
2.18909	0.353435	0.483243	0.267499
2.19591	0.317138	0.445796	0.265806
2.20273	0.279797	0.40925	0.261268
2.20954	0.243599	0.37668	0.254638
2.21636	0.208026	0.349788	0.245472
2.22318	0.175222	0.330605	0.235616
2.23	0.145621	0.316385	0.225166
2.23682	0.119456	0.304985	0.2147
2.24364	0.096783	0.294545	0.205169
2.25046	0.0738784	0.284049	0.196547
2.25728	0.0519642	0.274471	0.190113
2.2641	0.0314791	0.267312	0.186195
2.27092	0.0128465	0.263776	0.185101
2.27774	0	0.265176	0.186098
2.28456	0	0.271487	0.188209
2.29138	0	0.281376	0.190126
2.2982	0	0.292429	0.190284
2.30502	0	0.303201	0.188627
2.31184	0	0.313667	0.185625
2.31866	0	0.323811	0.182064
2.32548	0	0.335591	0.179535
2.3323	0	0.350784	0.179529
2.33912	0	0.36871	0.182754
2.34594	0	0.38803	0.188438
2.35276	0	0.40621	0.196425
2.35958	0	0.422355	0.205832
2.36639	0	0.434038	0.21665
2.37322	0	0.443292	0.228816
2.38003	0	0.451689	0.242527
2.38685	0	0.459658	0.257653
2.39367	0	0.4671	0.27265
2.40049	0	0.47269	0.286512
2.40731	0	0.476597	0.296477
2.41413	0	0.477794	0.303812
2.42095	0	0.478713	0.310961
2.42777	0	0.482744	0.319858
2.43459	0	0.494054	0.333694
2.44141	0	0.516192	0.351241
2.44823	0	0.547269	0.372065
2.45505	0	0.582123	0.391954
2.46187	0	0.616396	0.408853
2.46869	0	0.644825	0.420663
2.47551	0	0.664444	0.428554
2.48233	0	0.673583	0.433035
2.48915	0	0.678827	0.438164
2.49597	0	0.682874	0.444888
2.50279	0	0.690559	0.454252
2.50961	0	0.70485	0.466596
2.51643	0	0.728051	0.481673
2.52325	0	0.759703	0.497168
2.53007	0	0.795853	0.51014
2.53688	0	0.834001	0.522324
2.5437	0	0.867789	0.533975
2.55052	0	0.892166	0.546608
2.55734	0	0.905447	0.563011
2.56416	0	0.907153	0.582174
2.57098	0	0.902878	0.603774
2.5778	0	0.894499	0.62345
2.58462	0	0.885652	0.639543
2.59144	0	0.876354	0.649157
2.59826	0	0.866951	0.654658
2.60508	0	0.858395	0.658127
2.6119	0	0.852376	0.661861
2.61872	0	0.85252	0.663858
2.62554	0	0.863773	0.660976
2.63236	0	0.884562	0.649759
2.63918	0	0.909327	0.631349
2.646	0	0.932425	0.605666
2.65282	0	0.947319	0.578141
2.65964	0	0.949822	0.555576
2.66646	0	0.938544	0.541502
2.67328	0	0.91579	0.536259
2.6801	0	0.881372	0.537953
2.68692	0	0.837896	0.543962
2.69374	0	0.787829	0.551166
2.70056	0	0.741562	0.558172
2.70737	0	0.704301	0.561821
2.71419	0	0.675286	0.561838
2.72101	0	0.652704	0.55658
2.72783	0	0.636287	0.547388
2.73465	0	0.620336	0.534857
2.74147	0	0.606451	0.523076
2.74829	0	0.590802	0.512962
2.75511	0	0.573732	0.507327
2.76193	0	0.554034	0.504479
2.76875	0	0.532937	0.503883
2.77557	0	0.510824	0.500296
2.78239	0	0.48768	0.494743
2.78921	0	0.462365	0.48436
2.79603	0	0.434424	0.472351
2.80285	0	0.404053	0.459253
2.80967	0	0.372702	0.44637
2.81649	0	0.343021	0.436606
2.82331	0	0.317851	0.429358
2.83013	0	0.298604	0.426608
2.83695	0	0.286408	0.427938
2.84377	0	0.281017	0.431704
2.85059	0	0.280331	0.435091
2.8574	0	0.280192	0.436482
2.86422	0	0.278654	0.435846
2.87104	0	0.272841	0.434379
2.87786	0	0.263739	0.432966
2.88468	0	0.2525	0.435386
2.8915	0	0.242628	0.440774
2.89832	0	0.235676	0.44845
2.90514	0	0.232397	0.457525
2.91196	0	0.231583	0.466874
2.91878	0	0.232686	0.475703
2.9256	0	0.233582	0.480611
2.93242	0	0.233825	0.480807
2.93924	0	0.234282	0.47673
2.94606	0	0.235272	0.469122
2.95288	0	0.238952	0.460609
2.9597	0	0.245045	0.452618
2.96652	0	0.253585	0.447784
2.97334	0	0.263775	0.446604
2.98016	0	0.27534	0.44891
2.98698	0	0.288286	0.455861
2.9938	0	0.301769	0.46601
3.00062	0	0.313729	0.478491
3.00744	0	0.32129	0.489844
3.01426	0	0.323023	0.497838
3.02108	0	0.319954	0.500825
3.0279	0	0.314981	0.499405
3.03471	0	0.314765	0.494129
3.04153	0	0.318666	0.488451
3.04835	0	0.3262	0.484096
3.05517	0	0.33333	0.481531
3.06199	0	0.337545	0.480151
3.06881	0	0.336722	0.477496
3.07563	0	0.332435	0.471159
3.08245	0	0.323747	0.459142
3.08927	0	0.312495	0.442459
3.09609	0	0.298143	0.422582
3.10291	0	0.281598	0.403389
3.10973	0	0.263951	0.386517
3.11655	0	0.248603	0.377568
3.12337	0	0.236872	0.372479
3.13019	0	0.231454	0.373731
3.13701	0	0.231322	0.378443
3.14383	0	0.235077	0.384277
3.15065	0	0.238268	0.38754
3.15747	0	0.238416	0.386391
3.16429	0	0.232596	0.3818
3.17111	0	0.222437	0.375884
3.17793	0	0.209578	0.371714
3.18474	0	0.198754	0.371937
3.19157	0	0.192205	0.376299
3.19838	0	0.19026	0.384526
3.2052	0	0.192037	0.392326
3.21202	0	0.195025	0.398834
3.21884	0	0.19592	0.400902
3.22566	0	0.192291	0.400979
3.23248	0	0.183455	0.401115
3.2393	0	0.171489	0.403065
3.24612	0	0.157457	0.408178
3.25294	0	0.145983	0.415778
3.25976	0	0.139471	0.422668
3.26658	0	0.137825	0.428354
3.2734	0	0.139726	0.432537
3.28022	0	0.1437	0.437307
3.28704	0	0.147486	0.443821
3.29386	0	0.149661	0.453756
3.30068	0	0.150906	0.465125
3.3075	0	0.152063	0.475294
3.31432	0	0.154153	0.481312
3.32114	0	0.157895	0.482108
3.32796	0	0.163957	0.475894
3.33478	0	0.172555	0.465774
3.34159	0	0.183909	0.453899
3.34842	0	0.198132	0.442316
3.35523	0	0.215408	0.431337
3.36205	0	0.23497	0.421245
3.36887	0	0.255373	0.411523
3.37569	0	0.276529	0.403618
3.38251	0	0.298222	0.396362
3.38933	0	0.319921	0.390244
3.39615	0	0.340974	0.385187
3.40297	0	0.361304	0.381024
3.40979	0	0.379353	0.377113
3.41661	0	0.397369	0.371922
3.42343	0	0.414369	0.365167
3.43025	0	0.433056	0.356798
3.43707	0	0.454686	0.345502
3.44389	0	0.480048	0.331527
3.45071	0	0.50954	0.31399
3.45753	0	0.539346	0.295083
3.46435	0	0.567123	0.275789
3.47117	0	0.58769	0.259715
3.47799	0	0.600041	0.249406
3.48481	0	0.60483	0.245813
3.49163	0	0.607098	0.248991
3.49845	0	0.611241	0.256291
3.50527	0	0.619629	0.267917
3.51208	0	0.631953	0.280574
3.51891	0	0.645616	0.292744
3.52572	0	0.657561	0.30382
3.53254	0	0.665035	0.313571
3.53936	0	0.666698	0.321985
3.54618	0	0.663427	0.329636
3.553	0	0.655421	0.33749
3.55982	0	0.644735	0.346448
3.56664	0	0.630716	0.357186
3.57346	0	0.611082	0.370318
3.58028	0	0.587024	0.385956
3.5871	0	0.559156	0.404798
3.59392	0	0.529048	0.426764
3.60074	0	0.499304	0.450406
3.60756	0	0.471914	0.474638
3.61438	0	0.447646	0.498358
3.6212	0	0.42696	0.519
3.62802	0	0.410875	0.539187
3.63484	0	0.396107	0.559564
3.64166	0	0.382349	0.583491
3.64848	0	0.367421	0.612764
3.6553	0	0.349598	0.646678
3.66212	0	0.328572	0.684469
3.66893	0	0.303215	0.718892
3.67576	0	0.277278	0.750877
3.68257	0	0.251099	0.777616
3.68939	0	0.2271	0.802556
3.69621	0	0.205833	0.826453
3.70303	0	0.188719	0.850957
3.70985	0	0.175556	0.877428
3.71667	0	0.166689	0.90594
3.72349	0	0.161234	0.935718
3.73031	0	0.158623	0.964718
3.73713	0	0.158683	0.986488
3.74395	0	0.160373	1
3.75077	0	0.163489	0.999434
3.75759	0	0.167205	0.990221
3.76441	0	0.170607	0.972707
3.77123	0	0.171423	0.952855
3.77805	0	0.169124	0.935352
3.78487	0	0.164655	0.92097
3.79169	0	0.159429	0.90944
3.79851	0	0.155263	0.898971
3.80533	0	0.153217	0.888762
3.81215	0	0.154583	0.879271
3.81897	0	0.158697	0.869935
3.82579	0	0.164796	0.860906
3.83261	0	0.171902	0.850995
3.83942	0	0.179738	0.839066
3.84625	0	0.187678	0.823969
3.85306	0	0.195764	0.803974
3.85988	0	0.203831	0.779111
3.8667	0	0.212067	0.747852
3.87352	0	0.220153	0.713611
3.88034	0	0.227204	0.675087
3.88716	0	0.232224	0.636736
3.89398	0	0.235306	0.595633
3.9008	0	0.237882	0.553964
3.90762	0	0.241802	0.511925
3.91444	0	0.248629	0.471348
3.92126	0	0.258454	0.432568
3.92808	0	0.269444	0.397802
3.9349	0	0.278945	0.366946
3.94172	0	0.286377	0.339187
3.94854	0	0.29217	0.313684
3.95536	0	0.297994	0.28833
3.96218	0	0.305544	0.261609
3.969	0	0.314634	0.233961
3.97582	0	0.325468	0.206525
3.98264	0	0.337485	0.18077
3.98946	0	0.351105	0.157979
3.99627	0	0.365798	0.139174
4.0031	0	0.380829	0.123676
4.00992	0.00166306	0.394373	0.110748
4.01673	0.00519942	0.405929	0.098775
4.02355	0.00886268	0.41391	0.0870143
4.03037	0.0134312	0.41976	0.0751006
4.03719	0.0186813	0.422976	0.0633406
4.04401	0.0261934	0.422762	0.052377
4.05083	0.0340895	0.420052	0.0424196
4.05765	0.0432197	0.413409	0.0333837
4.06447	0.0518432	0.404398	0.0252028
4.07129	0.0608498	0.392294	0.0215537
4.07811	0.0715853	0.377418	0.020958
4.08493	0.0834593	0.360133	0.0204118
4.09175	0.0971734	0.341138	0.0194397
4.09857	0.111735	0.321129	0.0182934
4.10539	0.128095	0.302762	0.0168529
4.11221	0.143624	0.285523	0.0152164
4.11903	0.160021	0.269202	0.0135105
4.12585	0.176829	0.254558	0.011826
4.13267	0.194504	0.240113	0.0102539
4.13949	0.213541	0.227522	0.00898403
4.14631	0.233948	0.214991	0.00797727
4.15313	0.253234	0.20322	0.00720788
4.15994	0.270124	0.192192	0.00656106
4.16676	0.284522	0.18263	0.00592035
4.17359	0.294771	0.175583	0.00536567
4.1804	0.303474	0.171201	0.00487891
4.18722	0.313233	0.167542	0.00445736
4.19404	0.324491	0.162258	0.00416179
4.20086	0.338214	0.153939	0.00391557
4.20768	0.353776	0.142037	0.00364727
4.2145	0.369398	0.127839	0.00335675
4.22132	0.384929	0.113521	0.00304521
4.22814	0.397709	0.100716	0.00273166
4.23496	0.407396	0.0902644	0.00245381
4.24178	0.413922	0.0817957	0.00225694
4.2486	0.417029	0.0749315	0.00214011
4.25542	0.416006	0.0694584	0.0021092
4.26224	0.410513	0.0643956	0.00204367
4.26906	0.400064	0.0596463	0.00200406
4.27588	0.389309	0.0544388	0.00195859
4.2827	0.37939	0.0489931	0.00189527
4.28952	0.372618	0.0435204	0.00175859
4.29634	0.366799	0.0385332	0.00160764
4.30316	0.359097	0.0348345	0.00145669
4.30998	0.348471	0.0319237	0.00133137
4.3168	0.331551	0.0298492	0.00123609
4.32362	0.309407	0.0280142	0.00114095
4.33043	0.281715	0.0259987	0.00109352
4.33725	0.251988	0.0239698	0.00103745
4.34407	0.221425	0.0219591	0.00102247
4.35089	0.191142	0.0202823	0.00098286
4.35771	0.161399	0.0186696	0.000937358
4.36453	0.132498	0.0173058	0.000842079
4.37135	0.105965	0.0158163	0.000802287
4.37817	0.0814548	0.0142866	0.000719757
4.38499	0.0591513	0.0127348	0.000624478
4.39181	0.0385227	0.0111491	0.000544988
4.39863	0.0206943	0.00977349	0.000501722
4.40545	0.00631834	0.00881786	0.000461273
4.41227	0.000609571	0.00822753	0.000421663
4.41909	0	0.00783695	0.000438674
4.42591	0	0.00749212	0.000477645
4.43273	0	0.00704444	0.000517797
4.43955	0	0.00651594	0.00054588
4.44637	0	0.00601783	0.000511734
4.45319	0	0.00539068	0.000467127
4.46001	0	0.00475578	0.000395231
4.46683	0	0.00419611	0.000336748
4.47365	0	0.00378588	0.000275837
4.48047	0	0.00336327	0.000292657
4.48728	0	0.00294067	0.000304758
4.49411	0	0.00251807	0.000309142
4.50092	0	0.00209546	0.000331075
4.50774	0	0.00166712	0.000347009
4.51456	0	0.0011839	0.000363191
4.52138	0	0.000857501	0.000333779
4.5282	0	0.00063273	0.000294168
4.53502	0	0.000451238	0.000287799
4.54184	0	0.000336488	0.000282016
4.54866	0	0.000171866	0.00027294
4.55548	0	4.1588e-05	0.00027294
4.5623	0	0	0.00027294
4.56912	0	0	0.00027294
4.57594	0	0	0.00027294
4.58276	0	0	0.00027294
4.58958	0	0	0.00027294
4.5964	0	0	0.000239241
4.60322	0	0	0.000204705
4.61004	0	0	0.000204705
4.61686	0	0	0.000188645
4.62368	0	0	0.000149035
4.6305	0	0	0.000166116
4.63732	0	0	0.000173749
4.64414	0	0	0.000166674
4.65095	0	0	0.00013647
4.65777	0	0	0.00013647
4.66459	0	0	0.00013647
4.67141	0	0	0.00013647
4.67823	0	0	0.00013647
4.68505	0	0	0.000134396
4.69187	0	0	0.00013647
4.69869	0	0	0.000122732
4.70551	0	0	8.31214e-05
4.71233	0	0	6.8235e-05
4.71915	0	0	6.8235e-05
4.72597	0	0	6.8235e-05
4.73279	0	0	6.8235e-05
4.73961	0	0	6.8235e-05
4.74643	0	0	6.8235e-05
4.75325	0	0	6.8235e-05
4.76007	0	0	6.8235e-05
4.76689	0	0	6.8235e-05
4.77371	0	0	6.8235e-05
4.78053	0	0	6.8235e-05
4.78735	0	0	6.8235e-05
4.79417	0	0	6.8235e-05
4.80099	0	0	6.8235e-05
4.80781	0	0	6.8235e-05
4.81463	0	0	6.8235e-05
4.82144	0	0	8.16723e-05
4.82826	0	0	8.81257e-05
4.83508	0	0	8.11113e-05
4.8419	0	0	6.8235e-05
4.84872	0	0	6.8235e-05
4.85554	0	0	6.8235e-05
4.86236	0	0	6.8235e-05
4.86918	0	0	6.8235e-05
4.876	0	0	6.8235e-05
4.88282	0	0	6.8235e-05
4.88964	0	0	6.8235e-05
4.89646	0	0	6.8235e-05
4.90328	0	0	6.8235e-05
4.9101	0	0	6.8235e-05
4.91692	0	0	6.8235e-05
4.92374	0	0	4.86891e-05
4.93056	0	0	4.36819e-05
4.93738	0	0	6.8235e-05
4.9442	0	0	6.8235e-05
4.95102	0	0	6.8235e-05
4.95784	0	0	6.8235e-05
4.96466	0	0	6.8235e-05
4.97148	0	0	6.8235e-05
4.9783	0	0	6.8235e-05
4.98512	0	0	6.8235e-05
4.99193	0	0	6.8235e-05
4.99875	0	0	6.8235e-05
5.00557	0	0	6.8235e-05
5.01239	0	0	6.8235e-05
5.01921	0	0	6.8235e-05
5.02603	0	0	6.8235e-05
5.03285	0	0	6.8235e-05
5.03967	0	0	6.8235e-05
5.04649	0	0	6.8235e-05
5.05331	0	0	6.8235e-05
5.06013	0	0	6.04855e-05
5.06695	0	0	3.94673e-05
5.07377	0	0	6.8235e-05
5.08059	0	0	6.8235e-05
5.08741	0	0	6.8235e-05
5.09423	0	0	6.8235e-05
5.10105	0	0	6.8235e-05
5.10787	0	0	6.8235e-05
5.11469	0	0	6.8235e-05
5.12151	0	0	6.8235e-05
5.12833	0	0	6.8235e-05
5.13515	0	0	6.8235e-05
5.14196	0	0	6.8235e-05
5.14879	0	0	6.8235e-05
5.1556	0	0	6.8235e-05
5.16242	0	0	6.8235e-05
5.16924	0	0	5.07881e-05
5.17606	0	0	1.11778e-05
5.18288	0	0	0
5.1897	0	0	0
5.19652	0	0	0
5.20334	0	0	0
5.21016	0	0	4.48506e-06
5.21698	0	0	6.01536e-05
5.2238	0	0	6.8235e-05
5.23062	0	0	6.8235e-05
5.23744	0	0	6.8235e-05
5.24426	0	0	6.8235e-05
5.25108	0	0	6.8235e-05
5.2579	0	0	6.8235e-05
5.26472	0	0	4.21243e-05
5.27154	0	0	2.93443e-05
5.27836	0	0	3.11388e-05
5.28518	0	0	0
5.292	0	0	0
5.29882	0	0	0
5.30563	0	0	0
5.31245	0	0	0
5.31927	0	0	0
5.32609	0	0	0
5.33291	0	0	0
5.33973	0	0	0
5.34655	0	0	1.46913e-05
5.35337	0	0	0
5.36019	0	0	0
5.36701	0	0	0
5.37383	0	0	0
5.38065	0	0	0
5.38747	0	0	0
5.39429	0	0	3.18624e-05
5.40111	0	0	6.81892e-05
5.40793	0	0	9.65849e-05
5.41475	0	0	0.00013647
5.42157	0	0	0.00013647
5.42839	0	0	0.00013647
5.43521	0	0	0.00013647
5.44203	0	0	0.00013647
5.44885	0	0	9.27125e-05
5.45567	0	0	6.8235e-05

## Sheet: Figure 2H
	GFP	CD81	ALIX
0	0.133717	0.119022	0.107781
0.00998117	0.132483	0.119387	0.100132
0.0199623	0.130422	0.114173	0.0921939
0.0299435	0.12796	0.105575	0.0840021
0.0399247	0.125662	0.0966163	0.0753578
0.0499058	0.124083	0.0900331	0.0670066
0.059887	0.123347	0.0873589	0.0600264
0.0698682	0.122554	0.0878764	0.055276
0.0798493	0.120577	0.0900275	0.0523985
0.0898305	0.116694	0.0914765	0.0501553
0.0998117	0.11112	0.089768	0.0479279
0.109793	0.105223	0.0849312	0.0450162
0.119774	0.100565	0.0776239	0.0411787
0.129755	0.0988549	0.0698523	0.0382986
0.139736	0.100981	0.0631508	0.0375736
0.149718	0.1064	0.0593733	0.0393166
0.159699	0.113267	0.0596517	0.0430727
0.16968	0.118979	0.0641737	0.0479031
0.179661	0.121913	0.070835	0.0524493
0.189642	0.121712	0.0776589	0.0563237
0.199623	0.119313	0.0829754	0.0593011
0.209605	0.115915	0.0848399	0.0608722
0.219586	0.112537	0.082873	0.0608637
0.229567	0.109215	0.0784676	0.059303
0.239548	0.105811	0.0730453	0.0574399
0.249529	0.102783	0.0680106	0.0558437
0.25951	0.10088	0.0635975	0.0550624
0.269492	0.101465	0.0599284	0.0549327
0.279473	0.104828	0.0569415	0.0558446
0.289454	0.110469	0.0552795	0.0573273
0.299435	0.117465	0.0563349	0.0598427
0.309416	0.124639	0.0596577	0.0629629
0.319397	0.130992	0.065451	0.0666585
0.329379	0.135351	0.0730341	0.070099
0.33936	0.137137	0.0798093	0.0730313
0.349341	0.135875	0.083187	0.0741006
0.359322	0.131556	0.0826424	0.0723952
0.369303	0.125431	0.0776349	0.0670211
0.379284	0.118438	0.0706357	0.0591178
0.389266	0.112604	0.0644237	0.0497964
0.399247	0.109219	0.0627095	0.0416325
0.409228	0.10934	0.0671218	0.0358607
0.419209	0.112646	0.076126	0.0328498
0.42919	0.118081	0.0873768	0.033074
0.439171	0.124134	0.0950177	0.0353192
0.449153	0.130546	0.0969058	0.0388617
0.459134	0.137764	0.0935864	0.0428546
0.469115	0.146727	0.0877141	0.0472942
0.479096	0.157328	0.0844731	0.0519624
0.489077	0.16853	0.0861804	0.0564638
0.499058	0.177916	0.0933678	0.0604508
0.50904	0.184493	0.103616	0.0629518
0.519021	0.187273	0.115137	0.0643696
0.529002	0.187195	0.126282	0.0651048
0.538983	0.186582	0.13552	0.0655386
0.548964	0.188708	0.147144	0.0662201
0.558945	0.197066	0.16454	0.0678784
0.568927	0.213246	0.19186	0.0698679
0.578908	0.237737	0.232682	0.0719677
0.588889	0.269641	0.288346	0.0738596
0.59887	0.308827	0.357702	0.0754322
0.608851	0.354616	0.435485	0.0758789
0.618832	0.406528	0.513519	0.0742801
0.628814	0.463325	0.585077	0.0696523
0.638795	0.522865	0.643923	0.0619219
0.648776	0.58262	0.68875	0.0528319
0.658757	0.639425	0.720774	0.0450777
0.668738	0.691941	0.748978	0.0402434
0.678719	0.739723	0.783498	0.0388301
0.688701	0.783015	0.831155	0.0401055
0.698682	0.822014	0.889866	0.0433905
0.708663	0.855517	0.947068	0.0473259
0.718644	0.883413	0.987019	0.0517789
0.728625	0.906588	1	0.0566856
0.738606	0.926955	0.989307	0.0617127
0.748588	0.946647	0.965851	0.066947
0.758569	0.965322	0.937287	0.0716422
0.76855	0.979816	0.907326	0.0751129
0.778531	0.989601	0.874535	0.0778018
0.788512	0.995259	0.838953	0.0798345
0.798493	0.998522	0.802159	0.0814705
0.808475	1	0.763193	0.0824725
0.818456	0.996275	0.721923	0.0829257
0.828437	0.983113	0.674674	0.08222
0.838418	0.958083	0.62221	0.0809755
0.848399	0.921021	0.568891	0.0816764
0.85838	0.87463	0.522303	0.0865534
0.868362	0.822599	0.486201	0.096271
0.878343	0.767803	0.461174	0.109486
0.888324	0.714735	0.441789	0.123885
0.898305	0.664989	0.422435	0.137175
0.908286	0.620388	0.399612	0.149217
0.918267	0.582596	0.373643	0.162753
0.928249	0.551093	0.345923	0.179952
0.93823	0.522705	0.320636	0.201382
0.948211	0.493149	0.297827	0.226211
0.958192	0.459888	0.278548	0.250653
0.968173	0.422991	0.26073	0.271009
0.978154	0.385602	0.245066	0.285378
0.988136	0.351844	0.230024	0.294815
0.998117	0.323365	0.217921	0.301243
1.0081	0.300383	0.207732	0.308882
1.01808	0.281788	0.19951	0.322582
1.02806	0.266729	0.192811	0.34246
1.03804	0.255072	0.189572	0.365842
1.04802	0.246532	0.190519	0.388662
1.058	0.239998	0.193071	0.405213
1.06798	0.235818	0.195027	0.413181
1.07797	0.233804	0.193518	0.412877
1.08795	0.233551	0.187691	0.409848
1.09793	0.234006	0.179131	0.405941
1.10791	0.234639	0.169415	0.408319
1.11789	0.233893	0.16114	0.416298
1.12787	0.231581	0.158225	0.427101
1.13785	0.227838	0.160426	0.437822
1.14783	0.222531	0.166184	0.446437
1.15782	0.216995	0.1731	0.447986
1.1678	0.211069	0.177853	0.442957
1.17778	0.204389	0.177903	0.43515
1.18776	0.197097	0.172541	0.429897
1.19774	0.188996	0.163698	0.429027
1.20772	0.18084	0.153421	0.428147
1.2177	0.172215	0.146465	0.422662
1.22768	0.163599	0.145217	0.41105
1.23766	0.155326	0.15045	0.393468
1.24765	0.148668	0.162696	0.373072
1.25763	0.145535	0.18018	0.353992
1.26761	0.145771	0.201223	0.33759
1.27759	0.149121	0.224307	0.322319
1.28757	0.154389	0.247866	0.309478
1.29755	0.160103	0.269911	0.301077
1.30753	0.163656	0.290391	0.300306
1.31751	0.164574	0.306642	0.310443
1.3275	0.16238	0.31991	0.328713
1.33748	0.158035	0.332266	0.351862
1.34746	0.153096	0.347237	0.376171
1.35744	0.148804	0.368066	0.397788
1.36742	0.146148	0.395106	0.413457
1.3774	0.145072	0.424898	0.422299
1.38738	0.145272	0.453414	0.424697
1.39736	0.146503	0.475494	0.423248
1.40734	0.148744	0.487656	0.421808
1.41733	0.151288	0.487781	0.42604
1.42731	0.152845	0.478237	0.440031
1.43729	0.152218	0.463367	0.461648
1.44727	0.149044	0.449834	0.485829
1.45725	0.1444	0.444535	0.507206
1.46723	0.140131	0.450751	0.523263
1.47721	0.138143	0.467751	0.535531
1.48719	0.139363	0.494049	0.54481
1.49718	0.143118	0.525195	0.551406
1.50716	0.148133	0.556853	0.553389
1.51714	0.15304	0.583695	0.548235
1.52712	0.156188	0.597477	0.536504
1.5371	0.156398	0.591239	0.52309
1.54708	0.154065	0.565249	0.515438
1.55706	0.15024	0.521625	0.521576
1.56704	0.146384	0.467818	0.544075
1.57702	0.143888	0.414131	0.57934
1.58701	0.143504	0.365521	0.620998
1.59699	0.14423	0.327658	0.661664
1.60697	0.145173	0.298186	0.697598
1.61695	0.145656	0.271684	0.731083
1.62693	0.145959	0.245397	0.763449
1.63691	0.146876	0.219225	0.793798
1.64689	0.149474	0.196754	0.815084
1.65687	0.154096	0.179484	0.821912
1.66685	0.160673	0.167192	0.810963
1.67684	0.168679	0.160176	0.785527
1.68682	0.177454	0.158328	0.752805
1.6968	0.186043	0.163989	0.721663
1.70678	0.192822	0.177176	0.696131
1.71676	0.196891	0.198088	0.674228
1.72674	0.197992	0.226181	0.651314
1.73672	0.19758	0.260538	0.621842
1.7467	0.197956	0.300573	0.585997
1.75669	0.202879	0.346135	0.549629
1.76667	0.213697	0.392788	0.521136
1.77665	0.229409	0.439173	0.507951
1.78663	0.247583	0.481455	0.511209
1.79661	0.26367	0.517334	0.524059
1.80659	0.274302	0.546956	0.537415
1.81657	0.278152	0.572706	0.543351
1.82655	0.277172	0.597765	0.53668
1.83653	0.273344	0.624723	0.522973
1.84652	0.268678	0.652954	0.509958
1.8565	0.264746	0.680024	0.505473
1.86648	0.261864	0.699511	0.516643
1.87646	0.259971	0.709496	0.542683
1.88644	0.259921	0.715173	0.578425
1.89642	0.261218	0.724323	0.618703
1.9064	0.264785	0.741405	0.659637
1.91638	0.271831	0.765817	0.698589
1.92637	0.28121	0.786952	0.738694
1.93635	0.291445	0.797207	0.781919
1.94633	0.299784	0.792172	0.829218
1.95631	0.304051	0.773971	0.875068
1.96629	0.303696	0.747717	0.914515
1.97627	0.301143	0.72147	0.940634
1.98625	0.300004	0.700863	0.956439
1.99623	0.304027	0.684612	0.966089
2.00621	0.315544	0.670386	0.973122
2.0162	0.334783	0.65509	0.978825
2.02618	0.360316	0.639492	0.988634
2.03616	0.389268	0.625432	0.99807
2.04614	0.418625	0.613742	1
2.05612	0.445799	0.601406	0.987572
2.0661	0.468976	0.582597	0.954153
2.07608	0.48691	0.554881	0.902053
2.08606	0.501207	0.521216	0.83933
2.09605	0.514989	0.487461	0.780694
2.10603	0.529907	0.461302	0.732677
2.11601	0.546174	0.447078	0.696616
2.12599	0.563258	0.446011	0.667965
2.13597	0.580682	0.456041	0.641145
2.14595	0.59743	0.4751	0.612515
2.15593	0.613922	0.505213	0.579896
2.16591	0.630397	0.550561	0.544631
2.17589	0.647097	0.614456	0.509605
2.18588	0.66385	0.691595	0.477258
2.19586	0.679461	0.770514	0.449549
2.20584	0.693182	0.839281	0.427747
2.21582	0.704418	0.889414	0.411355
2.2258	0.712771	0.921435	0.399749
2.23578	0.717275	0.943517	0.392592
2.24576	0.718508	0.962777	0.38745
2.25574	0.717784	0.982289	0.381471
2.26572	0.717395	0.995388	0.372755
2.27571	0.719476	0.994958	0.359385
2.28569	0.723791	0.979795	0.340968
2.29567	0.728634	0.951547	0.319002
2.30565	0.730356	0.918563	0.297031
2.31563	0.728288	0.887435	0.278611
2.32561	0.725556	0.856623	0.264933
2.33559	0.725877	0.824252	0.254868
2.34557	0.730607	0.790539	0.247266
2.35556	0.73751	0.752436	0.24038
2.36554	0.743909	0.709963	0.233586
2.37552	0.746257	0.663433	0.226742
2.3855	0.744661	0.614343	0.220495
2.39548	0.740715	0.566284	0.215913
2.40546	0.736529	0.524191	0.214066
2.41544	0.731986	0.492962	0.215299
2.42542	0.725832	0.474016	0.219238
2.4354	0.716508	0.463376	0.22249
2.44539	0.70437	0.455362	0.223779
2.45537	0.691083	0.443761	0.222739
2.46535	0.676709	0.425716	0.220818
2.47533	0.664153	0.403416	0.220794
2.48531	0.651478	0.378413	0.221907
2.49529	0.636519	0.350769	0.222355
2.50527	0.619379	0.320728	0.219396
2.51525	0.600472	0.286001	0.213531
2.52524	0.583531	0.250098	0.206009
2.53522	0.568777	0.216901	0.19924
2.5452	0.555041	0.189291	0.192808
2.55518	0.538409	0.169993	0.185301
2.56516	0.517704	0.159832	0.175122
2.57514	0.492974	0.15687	0.162644
2.58512	0.469858	0.160204	0.149289
2.5951	0.452317	0.165562	0.136853
2.60508	0.440655	0.169815	0.126265
2.61507	0.431893	0.169614	0.118872
2.62505	0.421067	0.164645	0.115569
2.63503	0.405278	0.156693	0.117457
2.64501	0.386605	0.149034	0.124029
2.65499	0.368005	0.146367	0.13421
2.66497	0.352642	0.14982	0.146042
2.67495	0.342567	0.159961	0.157059
2.68493	0.337289	0.173436	0.163957
2.69492	0.337053	0.189326	0.166575
2.7049	0.338617	0.203301	0.164238
2.71488	0.339754	0.21322	0.159184
2.72486	0.339193	0.217547	0.153509
2.73484	0.338201	0.213171	0.146789
2.74482	0.338109	0.202541	0.140575
2.7548	0.338469	0.189093	0.133421
2.76478	0.33879	0.176797	0.125522
2.77476	0.338242	0.167205	0.117131
2.78475	0.335684	0.160351	0.110036
2.79473	0.331642	0.155398	0.106149
2.80471	0.325211	0.151394	0.104487
2.81469	0.316463	0.14618	0.104305

## Sheet: Figure 2I
	GFP	CD63	TSG101
0	0.0279981	0.0167035	0.00827594
0.013521	0.0282763	0.018286	0.00810589
0.027041	0.0290991	0.0198686	0.00814739
0.040562	0.0301432	0.0214512	0.00810771
0.054083	0.0311114	0.0229794	0.00817011
0.067603	0.0318819	0.0241581	0.00831998
0.081124	0.0323019	0.0255404	0.00872373
0.094645	0.0326826	0.0265684	0.00914529
0.108166	0.0334306	0.027474	0.0102316
0.121686	0.0342219	0.027154	0.0115537
0.135207	0.035246	0.0266003	0.0130798
0.148728	0.0362895	0.0267606	0.0146295
0.162248	0.0376547	0.0272246	0.0161674
0.175769	0.0394762	0.0287966	0.0176439
0.18929	0.0420311	0.0313219	0.0192432
0.20281	0.0456014	0.0338417	0.0207818
0.216331	0.050589	0.0374213	0.0226179
0.229852	0.056761	0.0400998	0.0243324
0.243373	0.0639104	0.0427104	0.0261281
0.256893	0.0722935	0.0461321	0.0280671
0.270414	0.0815379	0.0503058	0.0300605
0.283935	0.0918764	0.0552982	0.0323438
0.297455	0.103122	0.0598155	0.0343947
0.310976	0.115296	0.0638886	0.036554
0.324497	0.129039	0.0673422	0.038874
0.338017	0.145834	0.0695117	0.041818
0.351538	0.165944	0.0701167	0.0455379
0.365059	0.190911	0.0702745	0.0499332
0.37858	0.220577	0.0703308	0.0549219
0.3921	0.255221	0.0705246	0.0603812
0.405621	0.295266	0.0724643	0.0659998
0.419142	0.339571	0.0758137	0.0714978
0.432662	0.388251	0.0809714	0.0769527
0.446183	0.442174	0.0889958	0.0827599
0.459704	0.503134	0.0984392	0.0883451
0.473224	0.568881	0.108989	0.0944194
0.486745	0.637899	0.119687	0.100948
0.500266	0.708616	0.129605	0.106703
0.513787	0.78094	0.138133	0.112413
0.527307	0.849927	0.145229	0.117154
0.540828	0.912376	0.151792	0.121338
0.554349	0.961396	0.158974	0.126142
0.567869	0.99297	0.167435	0.131349
0.58139	1	0.179374	0.13769
0.594911	0.990735	0.194548	0.145047
0.608431	0.971873	0.211839	0.153293
0.621952	0.948239	0.23014	0.162782
0.635473	0.920477	0.248105	0.174592
0.648994	0.888725	0.265017	0.188426
0.662514	0.852322	0.280003	0.205433
0.676035	0.812902	0.294709	0.224521
0.689556	0.772929	0.308718	0.246277
0.703076	0.735725	0.320517	0.272275
0.716597	0.702187	0.329054	0.304021
0.730118	0.670032	0.332762	0.342436
0.743638	0.637959	0.33127	0.388643
0.757159	0.606937	0.325031	0.443455
0.77068	0.578219	0.315888	0.505723
0.784201	0.555591	0.30509	0.573724
0.797721	0.540589	0.294646	0.645303
0.811242	0.533521	0.284395	0.715761
0.824763	0.529691	0.276052	0.782179
0.838283	0.526345	0.268927	0.840241
0.851804	0.519398	0.261664	0.887431
0.865325	0.510163	0.25381	0.926669
0.878845	0.497738	0.243444	0.957189
0.892366	0.484474	0.233581	0.979508
0.905887	0.471874	0.224964	0.99331
0.919408	0.460658	0.219598	1
0.932928	0.45114	0.217007	0.998957
0.946449	0.442819	0.216638	0.99228
0.95997	0.436066	0.213293	0.981209
0.97349	0.429531	0.206509	0.964484
0.987011	0.422987	0.196806	0.941649
1.00053	0.414197	0.187402	0.908067
1.01405	0.40354	0.17891	0.864004
1.02757	0.391234	0.174423	0.811868
1.04109	0.378006	0.173659	0.753536
1.05462	0.365118	0.174378	0.69084
1.06814	0.353554	0.174573	0.629408
1.08166	0.342832	0.172166	0.57145
1.09518	0.332559	0.167519	0.52015
1.1087	0.32115	0.163428	0.476963
1.12222	0.310455	0.161589	0.442653
1.13574	0.300482	0.163848	0.416766
1.14926	0.291765	0.171264	0.398568
1.16278	0.283482	0.182833	0.385874
1.1763	0.274741	0.198974	0.376511
1.18982	0.264145	0.21811	0.366568
1.20334	0.252331	0.237292	0.355045
1.21686	0.240814	0.253938	0.340432
1.23038	0.23091	0.266738	0.325524
1.2439	0.224159	0.273388	0.313099
1.25743	0.220757	0.275543	0.307167
1.27095	0.218693	0.274475	0.3086
1.28447	0.217063	0.272486	0.316643
1.29799	0.215286	0.270085	0.32788
1.31151	0.213479	0.268722	0.341227
1.32503	0.212133	0.266356	0.35174
1.33855	0.211142	0.264256	0.359574
1.35207	0.2106	0.263186	0.365027
1.36559	0.210108	0.262033	0.368465
1.37911	0.209567	0.259917	0.374799
1.39263	0.208231	0.25593	0.384717
1.40615	0.206218	0.253115	0.399565
1.41967	0.202699	0.251908	0.418102
1.43319	0.198206	0.255919	0.437452
1.44671	0.193677	0.267421	0.454909
1.46024	0.189966	0.284843	0.468058
1.47376	0.187236	0.308638	0.475387
1.48728	0.18578	0.339935	0.47649
1.5008	0.184588	0.373918	0.47355
1.51432	0.18315	0.409517	0.466734
1.52784	0.181234	0.441869	0.45746
1.54136	0.179262	0.468738	0.443751
1.55488	0.177679	0.489917	0.424108
1.5684	0.176805	0.508393	0.400105
1.58192	0.177216	0.525574	0.372809
1.59544	0.178922	0.53963	0.346142
1.60896	0.18117	0.551175	0.322568
1.62248	0.183314	0.559411	0.304556
1.636	0.184622	0.565737	0.292011
1.64952	0.185055	0.573557	0.283898
1.66305	0.185138	0.582759	0.280531
1.67657	0.185176	0.592453	0.279333
1.69009	0.184446	0.604667	0.278347
1.70361	0.182414	0.615829	0.277754
1.71713	0.179455	0.628011	0.277577
1.73065	0.175533	0.638345	0.279243
1.74417	0.172232	0.646214	0.284751
1.75769	0.170691	0.655895	0.294506
1.77121	0.17204	0.664266	0.308082
1.78473	0.177021	0.673942	0.324707
1.79825	0.184566	0.680954	0.342473
1.81177	0.192555	0.679083	0.36005
1.82529	0.20021	0.670045	0.377692
1.83882	0.206343	0.653346	0.396025
1.85234	0.208743	0.631686	0.41588
1.86586	0.209202	0.610635	0.435319
1.87938	0.207595	0.59203	0.452116
1.8929	0.204556	0.580485	0.4642
1.90642	0.201506	0.575528	0.468525
1.91994	0.198922	0.576172	0.462194
1.93346	0.197918	0.579571	0.447012
1.94698	0.198657	0.581081	0.425357
1.9605	0.201127	0.573779	0.400912
1.97402	0.205635	0.556972	0.378802
1.98754	0.211839	0.533174	0.361982
2.00106	0.219231	0.504422	0.350228
2.01458	0.227299	0.473204	0.340112
2.02811	0.235016	0.441629	0.330451
2.04163	0.241377	0.410207	0.319359
2.05515	0.246128	0.381441	0.308199
2.06867	0.249839	0.359684	0.29787
2.08219	0.252767	0.345103	0.289726
2.09571	0.255898	0.338061	0.284498
2.10923	0.259614	0.33888	0.281144
2.12275	0.262474	0.344357	0.28059
2.13627	0.264439	0.353266	0.282743
2.14979	0.266222	0.364072	0.287939
2.16331	0.268293	0.376119	0.296367
2.17683	0.27108	0.386906	0.306849
2.19035	0.275862	0.397501	0.319982
2.20387	0.281801	0.409978	0.334656
2.21739	0.289908	0.432712	0.351175
2.23091	0.298495	0.467889	0.370124
2.24444	0.307262	0.516842	0.391981
2.25796	0.317208	0.576198	0.417359
2.27148	0.326652	0.642251	0.443374
2.285	0.334515	0.70767	0.467794
2.29852	0.34059	0.767758	0.486157
2.31204	0.344605	0.825491	0.498032
2.32556	0.347996	0.881017	0.501691
2.33908	0.35236	0.931827	0.500257
2.3526	0.356761	0.973577	0.495828
2.36612	0.362569	0.997072	0.49047
2.37964	0.368143	1	0.482836
2.39316	0.374133	0.97743	0.471451
2.40668	0.38132	0.937361	0.457022
2.42021	0.38942	0.890851	0.438813
2.43373	0.399822	0.841633	0.417628
2.44725	0.414012	0.794383	0.394272
2.46077	0.430935	0.747414	0.37018
2.47429	0.449659	0.703123	0.346864
2.48781	0.46875	0.656488	0.326006
2.50133	0.487091	0.607109	0.308635
2.51485	0.504002	0.555619	0.296937
2.52837	0.519505	0.506693	0.286256
2.54189	0.534719	0.462817	0.275389
2.55541	0.553101	0.429067	0.263106
2.56893	0.5776	0.396947	0.248861
2.58245	0.610989	0.365759	0.235417
2.59597	0.654536	0.3309	0.224183
2.60949	0.702657	0.293711	0.214571
2.62302	0.75294	0.256775	0.205961
2.63654	0.798191	0.224228	0.197739
2.65006	0.835871	0.198656	0.188008
2.66358	0.864476	0.180075	0.178042
2.6771	0.885861	0.166121	0.167953
2.69062	0.901213	0.154924	0.158261
2.70414	0.912932	0.145173	0.150027
2.71766	0.919682	0.135524	0.142078
2.73118	0.919736	0.126827	0.134554
2.7447	0.908771	0.119971	0.127591
2.75822	0.882285	0.11389	0.119916
2.77174	0.839431	0.108509	0.11211
2.78526	0.780925	0.103442	0.103812
2.79879	0.710956	0.0982907	0.0949899
2.81231	0.634228	0.0934619	0.0853491
2.82583	0.557317	0.0879221	0.0752094
2.83935	0.483911	0.0822231	0.0653652
2.85287	0.415809	0.077766	0.0562571
2.86639	0.352976	0.0738323	0.0478294
2.87991	0.296772	0.0718145	0.0409209
2.89343	0.246949	0.0723609	0.035771
2.90695	0.204296	0.0743514	0.0317527
2.92047	0.169574	0.0779724	0.0287426
2.93399	0.142374	0.0816993	0.0265553
2.94751	0.120147	0.0845887	0.0239748
2.96103	0.101953	0.08645	0.0218141
2.97455	0.0864215	0.0863916	0.0199352
2.98807	0.0732177	0.0842545	0.0180887
3.0016	0.0632453	0.0793637	0.016067
3.01512	0.055392	0.0735637	0.0144668
3.02864	0.0498512	0.0680578	0.0130805
3.04216	0.0462945	0.0637079	0.0119654
3.05568	0.0439313	0.0599352	0.0108503
3.0692	0.0422816	0.0587328	0.00998647
3.08272	0.0407199	0.0587354	0.00958891
3.09624	0.039006	0.0592399	0.00924278
3.10976	0.0370726	0.0590631	0.00889666
3.12328	0.0348921	0.0580574	0.00871479
3.1368	0.0327777	0.0570922	0.00873154
3.15032	0.0305311	0.0566136	0.00908826
3.16384	0.0285529	0.0568911	0.00937275
3.17736	0.0267143	0.0580002	0.00971888
3.19089	0.025224	0.0597747	0.00963568
3.20441	0.0238803	0.0613394	0.00962575
3.21793	0.0228931	0.0621619	0.00958834
3.23145	0.0225902	0.0610576	0.00949535

## Sheet: Figure 2J
	GFP	CD81	TSG101
0	0.0393423	0.0864711	0.00593102
0.009981	0.0390615	0.0868582	0.00568609
0.019962	0.0401398	0.0815712	0.0055562
0.029943	0.0413814	0.0744691	0.00543154
0.039924	0.0433706	0.0676711	0.00532887
0.049905	0.045825	0.0638716	0.00527872
0.059887	0.0488243	0.0635968	0.005053
0.069868	0.0520456	0.0652001	0.00486724
0.079849	0.0549253	0.0680639	0.0045877
0.08983	0.0570707	0.0712384	0.00449484
0.099811	0.0588314	0.0744128	0.00420605
0.109792	0.0601595	0.0752719	0.00391725
0.119773	0.0613746	0.0750857	0.00376449
0.129754	0.060701	0.076212	0.00350209
0.139735	0.059029	0.0760667	0.00326849
0.149716	0.0554379	0.0773284	0.00301224
0.159697	0.0500479	0.0790375	0.00288111
0.169679	0.044028	0.0794311	0.00292579
0.17966	0.0384173	0.0777123	0.00301292
0.189641	0.0339989	0.0752412	0.00330146
0.199622	0.0302208	0.0729579	0.00359026
0.209603	0.0276272	0.0724	0.00387018
0.219584	0.0263148	0.0755712	0.00416146
0.229565	0.0258059	0.0822406	0.00447233
0.239546	0.026757	0.0897528	0.00453078
0.249527	0.0288695	0.0942549	0.00472295
0.259508	0.0316179	0.0945169	0.00502742
0.269489	0.0344397	0.0895617	0.00551727
0.279471	0.0363798	0.0824547	0.00600713
0.289452	0.0372397	0.0755513	0.00649698
0.299433	0.0364022	0.0705199	0.00692723
0.309414	0.0354088	0.069286	0.00697681
0.319395	0.0349978	0.0714012	0.00691999
0.329376	0.0360641	0.0779506	0.00657381
0.339357	0.0383069	0.0874556	0.00625442
0.349338	0.0410397	0.0999023	0.00567683
0.359319	0.0435397	0.117126	0.00538136
0.3693	0.0447484	0.134783	0.00528591
0.379281	0.0451155	0.151761	0.0053905
0.389263	0.0452488	0.164578	0.00568864
0.399244	0.0446313	0.167739	0.00629017
0.409225	0.043704	0.16561	0.00682616
0.419206	0.0431427	0.160654	0.00750353
0.429187	0.0428505	0.157256	0.00804437
0.439168	0.0440752	0.159672	0.00884388
0.449149	0.0459124	0.167143	0.00959739
0.45913	0.0487911	0.177444	0.0105929
0.469111	0.0520598	0.188244	0.0116603
0.479092	0.0554121	0.197277	0.0125657
0.489073	0.0584517	0.202309	0.0128575
0.499055	0.062442	0.206752	0.0131586
0.509036	0.0671958	0.212025	0.0132148
0.519017	0.073174	0.215797	0.0132147
0.528998	0.0796826	0.22091	0.0133075
0.538979	0.0856333	0.223516	0.0132255
0.54896	0.0907852	0.223309	0.0128567
0.558941	0.0931706	0.216652	0.0121129
0.568922	0.0945329	0.210762	0.0110958
0.578903	0.0953979	0.2061	0.010054
0.588884	0.113505	0.202112	0.00954762
0.598865	0.144946	0.200223	0.0095282
0.608847	0.184643	0.197028	0.0100478
0.618828	0.237749	0.192341	0.011252
0.628809	0.299788	0.18471	0.0128418
0.63879	0.373364	0.176957	0.0144388
0.648771	0.454902	0.171986	0.0157628
0.658752	0.543893	0.168468	0.0166437
0.668733	0.636051	0.168317	0.0173369
0.678714	0.730915	0.166602	0.0177796
0.688695	0.824551	0.163518	0.0181384
0.698676	0.903421	0.160242	0.0188714
0.708658	0.963711	0.155171	0.0200429
0.718639	1	0.150584	0.021462
0.72862	0.999898	0.146914	0.0233193
0.738601	0.965487	0.144597	0.0253491
0.748582	0.912026	0.141291	0.0274451
0.758563	0.847084	0.136558	0.0298422
0.768544	0.788761	0.13052	0.0326204
0.778525	0.7466	0.120413	0.0359875
0.788506	0.71799	0.109287	0.0399378
0.798487	0.692479	0.0996577	0.0443331
0.808468	0.662252	0.0919914	0.0483324
0.81845	0.624041	0.0865393	0.0517947
0.828431	0.57694	0.0819579	0.0549963
0.838412	0.526149	0.0745887	0.0582888
0.848393	0.473136	0.0661158	0.062806
0.858374	0.419726	0.0590091	0.069643
0.868355	0.368958	0.0551749	0.0800628
0.878336	0.320995	0.0530195	0.0943145
0.888317	0.275816	0.0518521	0.112614
0.898298	0.238571	0.0505853	0.135319
0.908279	0.20511	0.0501237	0.163095
0.91826	0.177493	0.0510598	0.195861
0.928242	0.163245	0.0540543	0.232585
0.938223	0.15858	0.0588317	0.27366
0.948204	0.156338	0.0640687	0.31941
0.958185	0.154576	0.067583	0.367915
0.968166	0.154415	0.068727	0.419435
0.978147	0.15555	0.0671876	0.472402
0.988128	0.157608	0.0656731	0.527689
0.998109	0.159619	0.0654406	0.585254
1.00809	0.160134	0.0661035	0.640266
1.01807	0.159644	0.0683097	0.693032
1.02805	0.159006	0.0718053	0.742548
1.03803	0.159428	0.0736611	0.788047
1.04801	0.161045	0.0756809	0.83433
1.058	0.16326	0.0795363	0.882119
1.06798	0.16329	0.0864026	0.929136
1.07796	0.160212	0.0971338	0.967322
1.08794	0.154861	0.109142	0.994059
1.09792	0.14878	0.120941	1
1.1079	0.144363	0.129805	0.991459
1.11788	0.142077	0.133194	0.967959
1.12786	0.14235	0.135301	0.935703
1.13784	0.143626	0.137694	0.903162
1.14783	0.144707	0.143659	0.871326
1.15781	0.144693	0.157979	0.840126
1.16779	0.144587	0.179198	0.8076
1.17777	0.144116	0.205231	0.77313
1.18775	0.14257	0.230634	0.736591
1.19773	0.139923	0.248868	0.696589
1.20771	0.134182	0.255656	0.65026
1.21769	0.12743	0.253857	0.600202
1.22767	0.12091	0.246942	0.547933
1.23765	0.116286	0.240579	0.495021
1.24764	0.115394	0.236	0.446821
1.25762	0.116505	0.230918	0.403464
1.2676	0.119948	0.22832	0.368548
1.27758	0.123576	0.22496	0.341469
1.28756	0.12683	0.224982	0.321848
1.29754	0.131035	0.233657	0.310402
1.30752	0.134854	0.249802	0.304136
1.3175	0.138804	0.271734	0.300968
1.32749	0.143657	0.291978	0.29848
1.33747	0.148554	0.304725	0.294488
1.34745	0.153138	0.30527	0.289233
1.35743	0.155391	0.29392	0.284743
1.36741	0.154994	0.275628	0.282492
1.37739	0.151052	0.256133	0.28504
1.38737	0.144877	0.239511	0.291498
1.39735	0.137625	0.226112	0.30064
1.40733	0.131793	0.212495	0.312947
1.41732	0.128083	0.197448	0.329753
1.4273	0.125579	0.182132	0.350567
1.43728	0.125417	0.164102	0.372826
1.44726	0.126706	0.144143	0.393006
1.45724	0.128996	0.126222	0.408456
1.46722	0.131874	0.108451	0.416166
1.4772	0.134664	0.0948616	0.421376
1.48718	0.137385	0.0864735	0.428181
1.49716	0.13948	0.0847276	0.441253
1.50714	0.142989	0.0859271	0.462959
1.51713	0.147489	0.0852	0.490689
1.52711	0.152016	0.0809823	0.517523
1.53709	0.156275	0.0730124	0.539428
1.54707	0.158432	0.0653781	0.548053
1.55705	0.157387	0.058768	0.541344
1.56703	0.154084	0.0556141	0.524563
1.57701	0.15073	0.0549821	0.500648
1.58699	0.148903	0.0583843	0.474726
1.59698	0.148885	0.0624256	0.452708
1.60696	0.149971	0.0639131	0.436951
1.61694	0.150581	0.063611	0.424847
1.62692	0.148955	0.0605473	0.41367
1.6369	0.147166	0.0573566	0.3976
1.64688	0.144296	0.0535837	0.37639
1.65686	0.141468	0.0497474	0.350482
1.66684	0.138919	0.0483183	0.322168
1.67682	0.136007	0.0483605	0.296426
1.6868	0.132946	0.0506863	0.275005
1.69679	0.128897	0.0529293	0.258847
1.70677	0.123506	0.054518	0.244962
1.71675	0.118208	0.0555044	0.2333
1.72673	0.114622	0.0570051	0.223179
1.73671	0.11254	0.0603811	0.214629
1.74669	0.111652	0.0671663	0.209043
1.75667	0.11041	0.0781615	0.207887
1.76665	0.107381	0.0921001	0.209536
1.77663	0.10196	0.107519	0.212698
1.78662	0.0948068	0.120433	0.215161
1.7966	0.087828	0.129061	0.215407
1.80658	0.0845173	0.131237	0.211127
1.81656	0.08506	0.129942	0.203799
1.82654	0.0896285	0.12917	0.195356
1.83652	0.0966291	0.132381	0.1876
1.8465	0.102984	0.142124	0.183605
1.85648	0.107417	0.156976	0.183051
1.86646	0.109869	0.176879	0.185398
1.87644	0.112392	0.197065	0.189053
1.88643	0.115501	0.217968	0.19325
1.89641	0.120301	0.243354	0.197169
1.90639	0.124363	0.276375	0.201658
1.91637	0.125836	0.319431	0.206232
1.92635	0.122964	0.366464	0.211615
1.93633	0.118148	0.413293	0.218337
1.94631	0.112282	0.447574	0.226238
1.95629	0.107477	0.466374	0.23597
1.96627	0.10411	0.470101	0.247556
1.97626	0.102582	0.462039	0.260205
1.98624	0.10235	0.458569	0.272577
1.99622	0.103431	0.462307	0.285182
2.0062	0.105595	0.478548	0.299986
2.01618	0.109511	0.503397	0.32121
2.02616	0.113037	0.526646	0.346629
2.03614	0.116669	0.548419	0.379783
2.04612	0.118267	0.566256	0.414281
2.05611	0.11723	0.579033	0.447442
2.06609	0.115344	0.591363	0.479532
2.07607	0.112488	0.599006	0.507539
2.08605	0.109773	0.60446	0.531959
2.09603	0.110028	0.610813	0.550327
2.10601	0.112358	0.620907	0.562272
2.11599	0.115821	0.635105	0.568844
2.12597	0.119247	0.647453	0.571387
2.13595	0.122592	0.654933	0.569279
2.14594	0.124215	0.647462	0.564508
2.15592	0.125206	0.623692	0.556972
2.1659	0.125748	0.589388	0.546963
2.17588	0.126689	0.545563	0.536313
2.18586	0.128082	0.499559	0.526281
2.19584	0.129243	0.457893	0.515543
2.20582	0.129723	0.421385	0.502537
2.2158	0.130224	0.394665	0.485945
2.22578	0.132158	0.380227	0.46653
2.23576	0.136725	0.371912	0.445073
2.24575	0.144481	0.366164	0.424519
2.25573	0.154427	0.358114	0.405854
2.26571	0.163943	0.344181	0.386638
2.27569	0.1708	0.328479	0.366355
2.28567	0.173724	0.318154	0.342485
2.29565	0.172724	0.317236	0.314663
2.30563	0.168584	0.325392	0.28492
2.31561	0.163342	0.343596	0.256108
2.32559	0.160748	0.367957	0.231149
2.33557	0.161966	0.396339	0.210485
2.34556	0.169245	0.429165	0.19376
2.35554	0.181199	0.46646	0.178971
2.36552	0.194527	0.504112	0.164113
2.3755	0.205687	0.536481	0.149565
2.38548	0.212075	0.564784	0.136155
2.39546	0.213613	0.584189	0.124498
2.40544	0.212094	0.596669	0.116326
2.41542	0.212229	0.609175	0.109783
2.42541	0.21993	0.627722	0.104093
2.43539	0.249553	0.662568	0.0976766
2.44537	0.28462	0.717923	0.090275
2.45535	0.324562	0.793623	0.0823857
2.46533	0.370192	0.873194	0.0752009
2.47531	0.41906	0.943475	0.0689866
2.48529	0.476029	0.985508	0.0640469
2.49527	0.533598	1	0.060485
2.50525	0.593553	0.995987	0.0578917
2.51524	0.651565	0.983205	0.0555375
2.52522	0.701661	0.973189	0.0538946
2.5352	0.742689	0.964959	0.0523168
2.54518	0.775748	0.957335	0.0514392
2.55516	0.802867	0.953855	0.0510905
2.56514	0.825557	0.952938	0.0509249
2.57512	0.844919	0.951042	0.0501962
2.5851	0.860418	0.942691	0.048465
2.59508	0.871836	0.921444	0.0457701
2.60507	0.876062	0.88588	0.0417255
2.61505	0.872907	0.839885	0.0376174
2.62503	0.865179	0.784923	0.033483
2.63501	0.854823	0.72677	0.0295412
2.64499	0.839292	0.667611	0.0262673
2.65497	0.821722	0.613956	0.0235636
2.66495	0.797816	0.569016	0.0218687
2.67493	0.768922	0.53163	0.0206248
2.68491	0.729238	0.500083	0.0198128
2.69489	0.679709	0.468914	0.0191136
2.70488	0.622192	0.430293	0.0180245
2.71486	0.556945	0.382565	0.0163344
2.72484	0.488751	0.329702	0.0144883
2.73482	0.418669	0.271782	0.012645
2.7448	0.349712	0.219539	0.0109398
2.75478	0.28414	0.172362	0.00994731
2.76476	0.222628	0.132788	0.00941417
2.77474	0.166367	0.103416	0.00911799
2.78472	0.125417	0.0828666	0.00855626
2.79471	0.105449	0.0692958	0.00802956
2.80469	0.0911245	0.0598965	0.00749648
2.81467	0.0785626	0.052736	0.00720768
2.82465	0.0679414	0.0468645	0.00691888
2.83463	0.0600207	0.0425545	0.00690676
2.84461	0.0534381	0.0380142	0.00670559
2.85459	0.0484027	0.033557	0.00612973
2.86457	0.0438663	0.0299829	0.00558662
2.87455	0.0392199	0.0265332	0.00484207
2.88454	0.034418	0.0224896	0.0041416
2.89452	0.0303474	0.0188063	0.00361246
2.9045	0.0265218	0.0164347	0.00337895
2.91448	0.0234794	0.0137338	0.00306839
2.92446	0.0207538	0.011245	0.00302052
2.93444	0.0182513	0.00907889	0.002987
2.94442	0.0156307	0.00646042	0.0026982
2.9544	0.0128598	0.00520491	0.00271474
2.96438	0.0101831	0.00375491	0.00286551
2.97437	0.00809101	0.00353853	0.00283742
2.98435	0.00615326	0.00201307	0.00267572
2.99433	0.00475553	0.00185235	0.00264296
3.00431	0.00386947	0.00185235	0.00226771
3.01429	0.00338319	0.00185235	0.00180933
3.02427	0.00338319	0.00185235	0.00152053
3.03425	0.00314301	0.00117328	0.00118252
3.04423	0.00289988	0	0.000915583
3.05421	0.00289988	0	0.000755131
3.06419	0.00267703	0	0.000749718
3.07418	0.00237221	0	0.000454118
3.08416	0.00198818	0	0.000377565
3.09414	0.0015871	0	0.000377565

## Sheet: Figure 2K
	GFP	CD63	LC3B
0.061267	4.44554e-05	0.000191	0
0.065643	4.44554e-05	0.000209	0
0.070019	4.44554e-05	0.00022	0
0.074395	4.44554e-05	0.00023	0
0.078772	4.44554e-05	0.000247	0
0.083148	4.44554e-05	0.000272	0
0.087524	2.50059e-05	0.000301	0
0.0919	4.78667e-06	0.000334	0
0.096277	0	0.000375	0
0.100653	0	0.000423	0
0.105029	0	0.000471	0
0.109405	0	0.000512	0
0.113781	0	0.000552	0
0.118158	9.3506e-06	0.000589	0
0.122534	3.768e-05	0.000621	0
0.12691	7.23232e-05	0.000651	0
0.131286	0.000103171	0.000673	0
0.135662	0.000134992	0.000703	0
0.140039	0.000169613	0.000733	0
0.144415	0.000176424	0.00076	0
0.148791	0.000176424	0.000786	0
0.153167	0.000176424	0.000801	0
0.157543	0.000176424	0.000809	0
0.16192	0.000176424	0.000805	0
0.166296	0.000176424	0.000787	0
0.170672	0.000176424	0.000756	0
0.175048	0.000176424	0.000717	0
0.179424	0.000176424	0.000678	0
0.183801	0.000167073	0.00065	0
0.188177	0.000138744	0.000635	0
0.192553	0.000104101	0.000635	0
0.196929	8.41033e-05	0.000646	0.000111
0.201305	8.69249e-05	0.000655	0.000355
0.205682	8.69479e-05	0.000662	0.000561
0.210058	0.00011478	0.000655	0.000758
0.214434	0.000149423	0.000634	0.000758
0.21881	0.000184066	0.000606	0.000759
0.223186	0.000218709	0.000568	0.000759
0.227563	0.000251315	0.00053	0.000759
0.231939	0.000266497	0.0005	0.000759
0.236315	0.000266497	0.000477	0.000759
0.240691	0.000266497	0.000467	0.000759
0.245067	0.000266497	0.000467	0.000759
0.249444	0.000266497	0.000467	0.000759
0.25382	0.000267917	0.000463	0.000759
0.258196	0.000300371	0.00046	0.000759
0.262572	0.000324164	0.000459	0.000648
0.266949	0.000324164	0.000459	0.000404
0.271325	0.000324164	0.000458	0.000198
0.275701	0.000338809	0.00046	1.19e-06
0.280077	0.000368227	0.000467	1.19e-06
0.284453	0.00040287	0.000477	0
0.28883	0.000426219	0.000492	0
0.293206	0.000428257	0.000502	0.000101
0.297582	0.000447718	0.000515	0.000355
0.301958	0.000482361	0.00053	0.00061
0.306334	0.000491475	0.000539	0.000864
0.310711	0.000491475	0.000539	0.001118
0.315087	0.000491475	0.000536	0.001372
0.319463	0.000490055	0.000532	0.001606
0.323839	0.000457601	0.000523	0.001659
0.328215	0.000422958	0.000515	0.001659
0.332592	0.000388315	0.000512	0.001659
0.336968	0.000355818	0.00051	0.001659
0.341344	0.00033971	0.000518	0.001659
0.34572	0.000310292	0.000532	0.001659
0.350096	0.000275648	0.000552	0.001659
0.354473	0.0002523	0.000571	0.001659
0.358849	0.000242663	0.000591	0.001558
0.363225	0.000217591	0.000613	0.001303
0.367601	0.000182948	0.00064	0.001049
0.371977	0.000173834	0.000679	0.000912
0.376354	0.000173834	0.000728	0.000911
0.38073	0.000173834	0.000774	0.000911
0.385106	0.000173834	0.000816	0.000931
0.389482	0.000173834	0.000847	0.001132
0.393858	0.000173834	0.000854	0.001387
0.398235	0.000173834	0.00084	0.001641
0.402611	0.000171687	0.000819	0.001895
0.406987	0.00014226	0.000786	0.002059
0.411363	0.000107617	0.000745	0.002059
0.41574	7.2974e-05	0.000705	0.002059
0.420116	3.83308e-05	0.000671	0.002059
0.424492	1.33244e-05	0.000649	0.002059
0.428868	3.75333e-06	0.000627	0.002059
0.433244	3.75333e-06	0.000604	0.002059
0.437621	3.75333e-06	0.000583	0.001942
0.441997	3.75333e-06	0.000569	0.001689
0.446373	2.31704e-05	0.000569	0.001435
0.450749	5.78136e-05	0.000583	0.001181
0.455125	9.24568e-05	0.000615	0.000927
0.459502	0.0001271	0.000656	0.000673
0.463878	0.000161743	0.000709	0.000419
0.468254	0.000196386	0.000762	0.000275
0.47263	0.000227276	0.000817	0.000267
0.477006	0.000236671	0.000877	0.000505
0.481383	0.000236671	0.000937	0.000759
0.485759	0.000236671	0.000993	0.000981
0.490135	0.000236671	0.001039	0.001186
0.494511	0.000249636	0.001069	0.00142
0.498887	0.000284279	0.001077	0.001674
0.503264	0.000318922	0.001069	0.001928
0.50764	0.000353565	0.001043	0.002203
0.512016	0.000368792	0.001003	0.002701
0.516392	0.000368792	0.000967	0.00321
0.520768	0.000368792	0.000938	0.003718
0.525145	0.000361548	0.000926	0.004096
0.529521	0.00033887	0.000923	0.00435
0.533897	0.000304227	0.000928	0.004438
0.538273	0.000269583	0.000939	0.004282
0.542649	0.000260239	0.000968	0.004044
0.547026	0.000260239	0.001012	0.00379
0.551402	0.000260239	0.001082	0.003568
0.555778	0.000260239	0.001173	0.003363
0.560154	0.000247274	0.001283	0.003129
0.56453	0.000212631	0.001398	0.00292
0.568907	0.000177988	0.001508	0.002926
0.573283	0.000158494	0.001609	0.003128
0.577659	0.000158494	0.001708	0.003324
0.582035	0.000158494	0.0018	0.003725
0.586412	0.000158494	0.001889	0.004288
0.590788	0.000166454	0.001981	0.005046
0.595164	0.000210155	0.002079	0.006096
0.59954	0.000252301	0.002183	0.007418
0.603916	0.00030586	0.002287	0.009224
0.608293	0.000365843	0.002377	0.011245
0.612669	0.000433049	0.002455	0.013458
0.617045	0.000502336	0.002523	0.015647
0.621421	0.00058161	0.002603	0.017512
0.625797	0.00066619	0.002717	0.019003
0.630174	0.000735476	0.00289	0.019884
0.63455	0.000804763	0.003131	0.020183
0.638926	0.000834852	0.00342	0.020215
0.643302	0.000834852	0.003724	0.020023
0.647678	0.000834852	0.003999	0.019659
0.652055	0.000834852	0.004219	0.019142
0.656431	0.000834135	0.004373	0.018627
0.660807	0.000825853	0.004467	0.018025
0.665183	0.000861654	0.004527	0.017286
0.669559	0.000912024	0.004583	0.016222
0.673936	0.000969241	0.004664	0.015048
0.678312	0.00104018	0.004791	0.013949
0.682688	0.00110085	0.004959	0.013271
0.687064	0.00113609	0.005163	0.013268
0.69144	0.00115544	0.005378	0.014205
0.695817	0.00119008	0.005578	0.016183
0.700193	0.00123916	0.005772	0.018959
0.704569	0.00134332	0.005994	0.021906
0.708945	0.00148911	0.006287	0.024809
0.713321	0.00166461	0.006691	0.027588
0.717698	0.00184429	0.007231	0.030091
0.722074	0.00200948	0.00787	0.032237
0.72645	0.00213744	0.00857	0.034047
0.730826	0.00220889	0.009278	0.035453
0.735202	0.0022315	0.009954	0.036685
0.739579	0.0022341	0.010567	0.03756
0.743955	0.00223066	0.01111	0.037954
0.748331	0.00225102	0.011596	0.038036
0.752707	0.0023191	0.012056	0.038143
0.757084	0.0024331	0.012529	0.03841
0.76146	0.00259451	0.013081	0.039046
0.765836	0.00278774	0.01375	0.040081
0.770212	0.00299656	0.014557	0.041724
0.774588	0.00319861	0.015495	0.044018
0.778965	0.00336777	0.01652	0.04649
0.783341	0.00350969	0.017541	0.048904
0.787717	0.00364474	0.01853	0.051138
0.792093	0.00377324	0.019466	0.05321
0.796469	0.00389593	0.020373	0.055128
0.800846	0.00402155	0.021269	0.057127
0.805222	0.00416929	0.022204	0.059094
0.809598	0.00431761	0.023204	0.061189
0.813974	0.00448087	0.024341	0.063039
0.81835	0.0046481	0.025657	0.064566
0.822727	0.00482902	0.027195	0.065583
0.827103	0.00502444	0.02893	0.065953
0.831479	0.0052254	0.030776	0.065943
0.835855	0.00541162	0.032584	0.065654
0.840231	0.00559344	0.034203	0.065281
0.844608	0.00579386	0.035558	0.065458
0.848984	0.00603278	0.036665	0.066278
0.85336	0.00633521	0.03759	0.067639
0.857736	0.00671515	0.038441	0.069108
0.862112	0.00719281	0.039337	0.070375
0.866489	0.0077673	0.040417	0.071064
0.870865	0.00837807	0.041771	0.071586
0.875241	0.00900443	0.043423	0.071879
0.879617	0.00963658	0.04529	0.07236
0.883993	0.0102475	0.047268	0.072921
0.88837	0.0108318	0.049193	0.073483
0.892746	0.0113746	0.051	0.074416
0.897122	0.0119133	0.052686	0.075665
0.901498	0.0124697	0.054385	0.077412
0.905874	0.0130281	0.056254	0.079466
0.910251	0.0135883	0.058427	0.081852
0.914627	0.014144	0.060948	0.084569
0.919003	0.0147024	0.063795	0.087533
0.923379	0.0152618	0.066815	0.090703
0.927756	0.0158008	0.069772	0.093942
0.932132	0.0163093	0.072412	0.096809
0.936508	0.0168221	0.074536	0.099071
0.940884	0.0173634	0.076037	0.100561
0.94526	0.0179318	0.076913	0.101249
0.949637	0.0185833	0.077204	0.101066
0.954013	0.0192856	0.077063	0.100185
0.958389	0.0200351	0.076585	0.098466
0.962765	0.0207943	0.075938	0.095623
0.967141	0.0215521	0.075193	0.091525
0.971518	0.0223688	0.074437	0.086579
0.975894	0.0233495	0.073663	0.080655
0.98027	0.0245413	0.072893	0.074452
0.984646	0.0259607	0.072098	0.068098
0.989022	0.0276608	0.071323	0.062119
0.993399	0.0296733	0.070672	0.057242
0.997775	0.0320282	0.070256	0.053919
1.00215	0.0346614	0.070136	0.052286
1.00653	0.0374777	0.070333	0.052499
1.0109	0.0403855	0.070783	0.053988
1.01528	0.0432873	0.071357	0.05649
1.01966	0.0463267	0.07188	0.059143
1.02403	0.0496169	0.072248	0.06144
1.02841	0.0534604	0.072364	0.063348
1.03278	0.0579907	0.072238	0.065041
1.03716	0.0632551	0.071899	0.066538
1.04154	0.0690345	0.071432	0.067994
1.04591	0.0750837	0.070866	0.069102
1.05029	0.0811375	0.070227	0.06992
1.05466	0.0869735	0.06951	0.070151
1.05904	0.0926372	0.06868	0.069666
1.06342	0.0981806	0.067711	0.068924
1.06779	0.103883	0.066581	0.068218
1.07217	0.110019	0.065327	0.06762
1.07655	0.116905	0.06405	0.067369
1.08092	0.124753	0.062908	0.067157
1.0853	0.133468	0.062025	0.06695
1.08967	0.142912	0.061416	0.06648
1.09405	0.152685	0.061003	0.065553
1.09843	0.162679	0.060626	0.064146
1.1028	0.173019	0.060106	0.062242
1.10718	0.184222	0.059313	0.060146
1.11156	0.196728	0.058238	0.058086
1.11593	0.210755	0.056968	0.056175
1.12031	0.2262	0.055676	0.054406
1.12468	0.242499	0.054546	0.052615
1.12906	0.258966	0.053735	0.050174
1.13344	0.274887	0.053306	0.047056
1.13781	0.289978	0.053188	0.043247
1.14219	0.304293	0.053213	0.039079
1.14657	0.318403	0.053181	0.035345
1.15094	0.332871	0.052974	0.032795
1.15532	0.348255	0.052559	0.031886
1.15969	0.364764	0.05203	0.032853
1.16407	0.382171	0.051559	0.035167
1.16845	0.399875	0.051312	0.038477
1.17282	0.417068	0.051412	0.041953
1.1772	0.433369	0.051871	0.045047
1.18158	0.448547	0.052581	0.047584
1.18595	0.463041	0.053341	0.049747
1.19033	0.477259	0.053909	0.051496
1.1947	0.491997	0.054117	0.053313
1.19908	0.507787	0.053941	0.055062
1.20346	0.524851	0.053526	0.056666
1.20783	0.543005	0.053071	0.057847
1.21221	0.561524	0.05279	0.058548
1.21659	0.57942	0.052788	0.058823
1.22096	0.595696	0.053101	0.058761
1.22534	0.609294	0.05366	0.058481
1.22971	0.619882	0.054317	0.058431
1.23409	0.627757	0.054943	0.058703
1.23847	0.63346	0.05544	0.060127
1.24284	0.637683	0.055767	0.063537
1.24722	0.641177	0.055954	0.069219
1.2516	0.644225	0.056054	0.077125
1.25597	0.647218	0.056206	0.086755
1.26035	0.650202	0.05648	0.09721
1.26472	0.653022	0.056914	0.107592
1.2691	0.655438	0.057444	0.117501
1.27348	0.656827	0.057994	0.126928
1.27785	0.656718	0.058477	0.135698
1.28223	0.654936	0.058894	0.144238
1.2866	0.651605	0.059277	0.152607
1.29098	0.647471	0.059672	0.161134
1.29536	0.642913	0.060116	0.169986
1.29973	0.637832	0.060633	0.179527
1.30411	0.63182	0.061227	0.188977
1.30848	0.624174	0.061939	0.197547
1.31286	0.614474	0.062815	0.204323
1.31724	0.602685	0.063921	0.208575
1.32161	0.58908	0.065259	0.210817
1.32599	0.573854	0.066788	0.211668
1.33037	0.557383	0.06839	0.212081
1.33474	0.539948	0.06992	0.212674
1.33912	0.522133	0.071205	0.213729
1.3435	0.504677	0.072177	0.214971
1.34787	0.488355	0.072795	0.215585
1.35225	0.473638	0.0731	0.215225
1.35662	0.460828	0.073128	0.213417
1.361	0.450022	0.072916	0.20975
1.36538	0.441362	0.072457	0.204044
1.36975	0.435011	0.071715	0.197078
1.37413	0.430869	0.070678	0.189321
1.37851	0.428409	0.069383	0.18189
1.38288	0.42658	0.067876	0.175487
1.38726	0.424203	0.066263	0.169979
1.39163	0.420345	0.064662	0.165427
1.39601	0.414605	0.063308	0.161642
1.40039	0.407157	0.062406	0.158889
1.40476	0.398566	0.062141	0.157669
1.40914	0.389278	0.062542	0.158558
1.41351	0.379607	0.063522	0.161837
1.41789	0.369618	0.064895	0.167419
1.42227	0.359137	0.066485	0.174983
1.42664	0.347873	0.068252	0.184024
1.43102	0.335572	0.070253	0.194406
1.43539	0.322317	0.072579	0.20571
1.43977	0.308594	0.075234	0.218145
1.44415	0.29527	0.078099	0.232063
1.44852	0.2833	0.081015	0.247717
1.4529	0.273431	0.083792	0.264645
1.45728	0.266279	0.086319	0.280826
1.46165	0.261929	0.088492	0.294765
1.46603	0.260115	0.090272	0.305507
1.4704	0.260018	0.091623	0.312469
1.47478	0.260679	0.092596	0.315916
1.47916	0.261177	0.093307	0.316286
1.48353	0.260858	0.093916	0.314291
1.48791	0.259419	0.094631	0.310771
1.49229	0.256891	0.095525	0.306653
1.49666	0.25342	0.096612	0.302383
1.50104	0.249117	0.097839	0.297928
1.50541	0.244085	0.099203	0.293471
1.50979	0.238465	0.10071	0.288761
1.51417	0.232507	0.102415	0.285148
1.51854	0.22669	0.104353	0.284868
1.52292	0.221125	0.106562	0.291588
1.5273	0.21576	0.109028	0.306969
1.53167	0.210024	0.111777	0.330596
1.53605	0.203477	0.114829	0.359624
1.54042	0.195863	0.11813	0.390429
1.5448	0.187398	0.121487	0.419988
1.54918	0.178885	0.124731	0.447407
1.55355	0.171206	0.127677	0.472598
1.55793	0.1653	0.130273	0.496089
1.56231	0.161763	0.132509	0.517314
1.56668	0.160705	0.134456	0.535882
1.57106	0.161796	0.136129	0.54974
1.57543	0.164304	0.137577	0.55833
1.57981	0.167317	0.138763	0.559918
1.58419	0.169914	0.139708	0.554036
1.58856	0.171465	0.140435	0.539683
1.59294	0.171879	0.141019	0.517887
1.59732	0.171614	0.141607	0.490824
1.60169	0.171254	0.14239	0.462957
1.60607	0.171209	0.143545	0.438207
1.61044	0.171549	0.145216	0.419752
1.61482	0.171955	0.14739	0.407948
1.6192	0.172086	0.149979	0.401935
1.62357	0.171578	0.152802	0.40009
1.62795	0.170404	0.155704	0.401187
1.63233	0.168653	0.158556	0.403889
1.6367	0.166522	0.161341	0.408076
1.64108	0.164135	0.164141	0.413076
1.64545	0.161567	0.167157	0.418976
1.64983	0.158874	0.170555	0.425122
1.65421	0.156205	0.174366	0.43162
1.65858	0.153601	0.178505	0.437474
1.66296	0.151102	0.182659	0.442336
1.66733	0.148872	0.186602	0.444257
1.67171	0.147213	0.19014	0.443111
1.67609	0.14652	0.193351	0.43858
1.68046	0.146887	0.196465	0.431266
1.68484	0.148173	0.199788	0.421931
1.68921	0.150003	0.203602	0.4114
1.69359	0.151808	0.208017	0.401152
1.69797	0.153137	0.213066	0.392462
1.70234	0.153719	0.21865	0.385599
1.70672	0.153505	0.224646	0.379871
1.7111	0.152811	0.23091	0.373802
1.71547	0.151932	0.237265	0.366177
1.71985	0.151194	0.243509	0.356464
1.72422	0.150765	0.249489	0.345585
1.7286	0.150641	0.255243	0.334892
1.73298	0.150639	0.260873	0.326535
1.73735	0.15052	0.266587	0.321328
1.74173	0.150031	0.272473	0.319896
1.74611	0.149003	0.278451	0.321861
1.75048	0.147415	0.284226	0.326246
1.75486	0.145346	0.289429	0.331084
1.75924	0.143018	0.293863	0.334
1.76361	0.14071	0.297523	0.333633
1.76799	0.138638	0.3006	0.330216
1.77236	0.137082	0.303326	0.325273
1.77674	0.136078	0.305886	0.320964
1.78112	0.13546	0.308348	0.318711
1.78549	0.134972	0.310741	0.319119
1.78987	0.134292	0.31305	0.321444
1.79424	0.133257	0.315284	0.324135
1.79862	0.13181	0.317397	0.325735
1.803	0.130035	0.319357	0.325326
1.80737	0.127966	0.321111	0.32178
1.81175	0.125739	0.322634	0.314814
1.81612	0.123522	0.323953	0.30462
1.8205	0.121496	0.325217	0.292902
1.82488	0.119857	0.326523	0.282217
1.82925	0.11865	0.32789	0.27454
1.83363	0.117869	0.329185	0.271016
1.83801	0.117242	0.330032	0.271378
1.84238	0.116465	0.330137	0.273964
1.84676	0.115365	0.32932	0.277087
1.85113	0.113835	0.327715	0.279071
1.85551	0.111973	0.325607	0.279867
1.85989	0.109922	0.32324	0.279218
1.86426	0.107961	0.320723	0.277506
1.86864	0.106306	0.317848	0.274798
1.87302	0.105218	0.314388	0.271275
1.87739	0.104825	0.310267	0.267274
1.88177	0.105105	0.305618	0.263651
1.88614	0.105939	0.30059	0.261093
1.89052	0.106965	0.295334	0.259531
1.8949	0.107921	0.289854	0.259108
1.89927	0.108515	0.284193	0.258705
1.90365	0.108789	0.278518	0.25738
1.90803	0.108926	0.272956	0.255115
1.9124	0.109211	0.26764	0.251813
1.91678	0.109881	0.262457	0.247981
1.92115	0.11106	0.257258	0.243066
1.92553	0.112699	0.251777	0.236964
1.92991	0.114585	0.246005	0.229274
1.93428	0.11656	0.240146	0.219745
1.93866	0.118425	0.234497	0.208901
1.94304	0.120057	0.229173	0.197068
1.94741	0.121402	0.224114	0.184466
1.95179	0.122504	0.219145	0.171164
1.95616	0.123548	0.214131	0.157835
1.96054	0.124679	0.209061	0.144746
1.96492	0.126048	0.203972	0.133295
1.96929	0.127506	0.198929	0.124533
1.97367	0.128836	0.193979	0.118884
1.97805	0.129783	0.189199	0.116337
1.98242	0.130147	0.184775	0.116222
1.9868	0.130031	0.180808	0.118493
1.99117	0.12959	0.177444	0.123743
1.99555	0.129001	0.174533	0.13229
1.99993	0.128243	0.171915	0.144365
2.0043	0.127204	0.169309	0.15917
2.00868	0.125776	0.166577	0.175724
2.01305	0.123792	0.163657	0.1924
2.01743	0.121098	0.160654	0.207415
2.02181	0.117578	0.157654	0.219533
2.02618	0.113206	0.154732	0.228015
2.03056	0.108116	0.151903	0.232792
2.03493	0.10262	0.149189	0.234448
2.03931	0.0971428	0.146578	0.234016
2.04369	0.092078	0.143956	0.232719
2.04806	0.0877835	0.141153	0.231394
2.05244	0.0842465	0.138033	0.230089
2.05682	0.0813301	0.134535	0.228057
2.06119	0.0788595	0.130765	0.224922
2.06557	0.0766678	0.12691	0.220336
2.06995	0.0747592	0.123228	0.214845
2.07432	0.0730766	0.119973	0.208671
2.0787	0.0716597	0.117308	0.202773
2.08307	0.0705931	0.11527	0.198181
2.08745	0.0699843	0.113809	0.19566
2.09183	0.0699266	0.112825	0.195419
2.0962	0.0703527	0.112213	0.196784
2.10058	0.0712063	0.111788	0.199067
2.10495	0.0723036	0.11143	0.201159
2.10933	0.0735004	0.111151	0.20288
2.11371	0.0746983	0.111059	0.204038
2.11808	0.0758822	0.111301	0.204799
2.12246	0.0769898	0.11195	0.204957
2.12684	0.0779619	0.112968	0.20405
2.13121	0.0787214	0.114194	0.201757
2.13559	0.0791917	0.1154	0.198176
2.13996	0.0795474	0.11636	0.194184
2.14434	0.0800083	0.116994	0.190252
2.14872	0.0809656	0.117283	0.186684
2.15309	0.082583	0.117253	0.182681
2.15747	0.0848457	0.116962	0.177735
2.16185	0.0875393	0.116385	0.171768
2.16622	0.0902231	0.115653	0.165421
2.1706	0.0925829	0.114909	0.160076
2.17497	0.0944223	0.114286	0.156446
2.17935	0.0956688	0.113857	0.155404
2.18373	0.0964091	0.113627	0.156854
2.1881	0.0968652	0.113546	0.16039
2.19248	0.0972376	0.113514	0.165272
2.19685	0.097658	0.113467	0.171176
2.20123	0.0982384	0.113461	0.177676
2.20561	0.0988627	0.113563	0.184296
2.20998	0.0994706	0.113812	0.190886
2.21436	0.0998452	0.114212	0.197513
2.21874	0.0998977	0.114755	0.204741
2.22311	0.0995968	0.115434	0.212689
2.22749	0.0989811	0.11631	0.221182
2.23186	0.0981553	0.117385	0.228933
2.23624	0.0971805	0.118619	0.23438
2.24062	0.0961345	0.119948	0.236319
2.24499	0.0951394	0.121276	0.234121
2.24937	0.0942462	0.122503	0.228054
2.25375	0.0935674	0.12351	0.219267
2.25812	0.0932146	0.124304	0.208898
2.2625	0.0933529	0.12487	0.197398
2.26687	0.0940036	0.12525	0.184949
2.27125	0.0951644	0.125453	0.171826
2.27563	0.0965397	0.125567	0.158407
2.28	0.0977337	0.125622	0.145258
2.28438	0.0984185	0.125701	0.132909
2.28876	0.0984011	0.125807	0.122368
2.29313	0.0977472	0.125913	0.114633
2.29751	0.0967261	0.125937	0.110594
2.30188	0.0956081	0.12579	0.111174
2.30626	0.0945447	0.125382	0.117022
2.31064	0.0935673	0.124691	0.127757
2.31501	0.0926699	0.123762	0.142786
2.31939	0.0917669	0.122755	0.160613
2.32376	0.0907551	0.121801	0.179977
2.32814	0.0895542	0.121044	0.199482
2.33252	0.0881557	0.120501	0.218136
2.33689	0.0866123	0.120092	0.234487
2.34127	0.0851617	0.119662	0.247341
2.34565	0.0840946	0.119053	0.256522
2.35002	0.0836693	0.118165	0.262602
2.3544	0.0841176	0.117032	0.266776
2.35878	0.0854297	0.115785	0.271043
2.36315	0.0874427	0.114641	0.277738
2.36753	0.089815	0.113848	0.288708
2.3719	0.0921956	0.113587	0.303745
2.37628	0.0942801	0.113881	0.321735
2.38066	0.0958867	0.114593	0.340268
2.38503	0.0970284	0.115459	0.357259
2.38941	0.097801	0.116188	0.371256
2.39378	0.0983473	0.116584	0.382841
2.39816	0.0987422	0.116587	0.393012
2.40254	0.099016	0.116326	0.404901
2.40691	0.0992179	0.1159	0.420769
2.41129	0.0993702	0.115427	0.442062
2.41567	0.0994967	0.114909	0.46875
2.42004	0.0994939	0.114271	0.499869
2.42442	0.0992462	0.11342	0.533394
2.42879	0.0987277	0.112303	0.566462
2.43317	0.0979318	0.110831	0.597411
2.43755	0.0971109	0.109004	0.625671
2.44192	0.0965344	0.106888	0.652192
2.4463	0.0965361	0.104666	0.677707
2.45067	0.0971924	0.102589	0.702843
2.45505	0.0985133	0.100944	0.726906
2.45943	0.100311	0.099944	0.749078
2.4638	0.102285	0.099671	0.769087
2.46818	0.104081	0.100061	0.785765
2.47256	0.105265	0.10101	0.798425
2.47693	0.105574	0.102416	0.805722
2.48131	0.104875	0.104218	0.806428
2.48569	0.103266	0.106366	0.799486
2.49006	0.101103	0.108787	0.784306
2.49444	0.0986417	0.111307	0.761754
2.49881	0.0962679	0.113748	0.73257
2.50319	0.0941187	0.115915	0.699113
2.50757	0.0922181	0.117728	0.663262
2.51194	0.0903819	0.119206	0.628086
2.51632	0.0885021	0.120406	0.596049
2.52069	0.0864184	0.121478	0.568628
2.52507	0.0841705	0.1225	0.546998
2.52945	0.0818889	0.123576	0.531271
2.53382	0.0797778	0.124775	0.521626
2.5382	0.0780396	0.126112	0.518215
2.54257	0.0767126	0.127526	0.520522
2.54695	0.0757721	0.128912	0.526892
2.55133	0.0751796	0.13018	0.535874
2.5557	0.0747851	0.131279	0.546753
2.56008	0.0746483	0.132245	0.559488
2.56446	0.074833	0.13315	0.573907
2.56883	0.0754166	0.134123	0.589228
2.57321	0.0763887	0.135214	0.603377
2.57759	0.0776194	0.136479	0.613452
2.58196	0.0788232	0.137935	0.617062
2.58634	0.0797722	0.139635	0.614649
2.59071	0.0802225	0.141632	0.606712
2.59509	0.0801185	0.143968	0.594722
2.59947	0.0795704	0.146596	0.579392
2.60384	0.0787651	0.149398	0.561275
2.60822	0.0779561	0.152331	0.540787
2.61259	0.0772269	0.15539	0.518813
2.61697	0.0765241	0.158663	0.496384
2.62135	0.0758018	0.162228	0.474142
2.62572	0.0749205	0.166215	0.452052
2.6301	0.0737574	0.170779	0.430307
2.63448	0.0721561	0.176013	0.40949
2.63885	0.0700508	0.181995	0.391627
2.64323	0.0675231	0.188644	0.378963
2.6476	0.0648149	0.195796	0.372976
2.65198	0.0621866	0.203042	0.373122
2.65636	0.0599441	0.210048	0.377004
2.66073	0.0582688	0.216464	0.380964
2.66511	0.0572025	0.222324	0.382507
2.66948	0.056732	0.227912	0.380345
2.67386	0.0567321	0.233621	0.375022
2.67824	0.0571544	0.239711	0.368736
2.68261	0.0578898	0.246291	0.363037
2.68699	0.0589021	0.253251	0.359121
2.69137	0.060138	0.26032	0.356142
2.69574	0.0616192	0.267206	0.352762
2.70012	0.063401	0.273722	0.347337
2.7045	0.0655155	0.279816	0.338952
2.70887	0.0678876	0.285576	0.328095
2.71325	0.0703378	0.29125	0.316287
2.71762	0.0726844	0.297141	0.305953
2.722	0.0747235	0.303426	0.298789
2.72638	0.0763923	0.310156	0.296225
2.73075	0.0777086	0.317114	0.297852
2.73513	0.0787237	0.324013	0.302363
2.7395	0.0794931	0.330543	0.307808
2.74388	0.0800801	0.336648	0.312194
2.74826	0.0805906	0.342472	0.314184
2.75263	0.0811147	0.348416	0.313296
2.75701	0.0816827	0.354868	0.31079
2.76139	0.0822827	0.362168	0.307529
2.76576	0.0828501	0.370486	0.303964
2.77014	0.0833394	0.379711	0.299687
2.77451	0.0838087	0.389692	0.293538
2.77889	0.0844718	0.399865	0.284528
2.78327	0.0854653	0.40999	0.272017
2.78764	0.0868931	0.419795	0.257069
2.79202	0.0886815	0.429431	0.240977
2.79639	0.0906848	0.439137	0.22571
2.80077	0.0927241	0.449346	0.212738
2.80515	0.0946588	0.460371	0.203271
2.80952	0.0963692	0.472254	0.197187
2.8139	0.0977485	0.484685	0.193956
2.81828	0.0986418	0.497115	0.192436
2.82265	0.099032	0.509052	0.191328
2.82703	0.0988798	0.520195	0.189947
2.83141	0.0982781	0.530443	0.188151
2.83578	0.0973797	0.540177	0.186419
2.84016	0.096262	0.549796	0.18546
2.84453	0.0949236	0.560024	0.185561
2.84891	0.0934005	0.571072	0.186677
2.85329	0.0916799	0.583263	0.187671
2.85766	0.0897694	0.59638	0.187753
2.86204	0.087692	0.610152	0.185664
2.86641	0.0854466	0.624105	0.181322
2.87079	0.0831548	0.638137	0.174822
2.87517	0.0809147	0.652402	0.167475
2.87954	0.0789101	0.667498	0.16074
2.88392	0.0774264	0.684074	0.155785
2.88829	0.0766578	0.702598	0.153301
2.89267	0.0768209	0.723103	0.153425
2.89705	0.0780107	0.745123	0.155512
2.90142	0.0801154	0.767877	0.158276
2.9058	0.0828264	0.790557	0.160668
2.91018	0.0856772	0.812582	0.161754
2.91455	0.088122	0.833636	0.161163
2.91893	0.0899693	0.853524	0.159515
2.92331	0.0912223	0.872155	0.15762
2.92768	0.0921109	0.889543	0.15712
2.93206	0.0930044	0.90578	0.158382
2.93643	0.0941029	0.920836	0.161737
2.94081	0.0955405	0.934518	0.166565
2.94519	0.0972316	0.946524	0.171937
2.94956	0.0989602	0.95655	0.176431
2.95394	0.10051	0.96455	0.178783
2.95831	0.101613	0.9707	0.178463
2.96269	0.102028	0.975418	0.175788
2.96707	0.101668	0.97895	0.172011
2.97144	0.100722	0.981448	0.168308
2.97582	0.099554	0.983019	0.165814
2.9802	0.0986308	0.983955	0.164787
2.98457	0.0981149	0.984569	0.165013
2.98895	0.0980126	0.985362	0.165835
2.99332	0.0982082	0.986454	0.166222
2.9977	0.0985159	0.987717	0.165951
3.00208	0.098832	0.988541	0.164826
3.00645	0.0991226	0.988583	0.163056
3.01083	0.0994498	0.987232	0.160337
3.0152	0.0999034	0.984574	0.157075
3.01958	0.10058	0.980556	0.153562
3.02396	0.10162	0.975421	0.150213
3.02833	0.103191	0.969338	0.147452
3.03271	0.105209	0.962582	0.145293
3.03709	0.107549	0.955371	0.143966
3.04146	0.109821	0.947618	0.143272
3.04584	0.111772	0.93911	0.143731
3.05022	0.113181	0.929577	0.145514
3.05459	0.113978	0.918699	0.148703
3.05897	0.114095	0.906431	0.152816
3.06334	0.1135	0.892884	0.15715
3.06772	0.112207	0.878546	0.161093
3.0721	0.110349	0.863819	0.164863
3.07647	0.108137	0.849517	0.169735
3.08085	0.105782	0.835773	0.176528
3.08522	0.103381	0.822835	0.18608
3.0896	0.100958	0.810498	0.198167
3.09398	0.0983956	0.798888	0.211494
3.09835	0.0958042	0.787958	0.224987
3.10273	0.0933082	0.777829	0.236983
3.10711	0.0913298	0.768517	0.246981
3.11148	0.0901593	0.759721	0.254863
3.11586	0.0899957	0.751133	0.261238
3.12023	0.0908758	0.742452	0.267085
3.12461	0.0926695	0.733613	0.273731
3.12899	0.0952421	0.724806	0.281431
3.13336	0.0983863	0.716275	0.289816
3.13774	0.101851	0.708214	0.296935
3.14211	0.105449	0.700489	0.301094
3.14649	0.10904	0.693035	0.301211
3.15087	0.112613	0.6857	0.297201
3.15524	0.116167	0.678439	0.290233
3.15962	0.119647	0.670902	0.282899
3.164	0.122919	0.662779	0.27789
3.16837	0.125697	0.653601	0.27729
3.17275	0.127632	0.643235	0.281625
3.17713	0.128434	0.631975	0.289559
3.1815	0.128037	0.620233	0.298654
3.18588	0.126614	0.608654	0.305791
3.19025	0.124654	0.597604	0.307903
3.19463	0.12266	0.587175	0.304324
3.19901	0.121204	0.577086	0.295693
3.20338	0.120497	0.56707	0.284809
3.20776	0.120559	0.556866	0.273715
3.21213	0.121106	0.546397	0.264787
3.21651	0.121742	0.535661	0.259656
3.22089	0.122026	0.524741	0.259188
3.22526	0.121678	0.513691	0.262615
3.22964	0.120613	0.502762	0.268184
3.23402	0.118958	0.492269	0.273575
3.23839	0.117142	0.482511	0.27697
3.24277	0.115521	0.473638	0.278398
3.24714	0.114431	0.465751	0.279397
3.25152	0.113944	0.458786	0.28271
3.2559	0.113873	0.452704	0.290706
3.26027	0.113872	0.447399	0.303561
3.26465	0.11342	0.442976	0.320303
3.26903	0.112215	0.4393	0.339098
3.2734	0.110033	0.436313	0.358781
3.27778	0.106975	0.433627	0.377962
3.28215	0.103322	0.430982	0.395585
3.28653	0.0994714	0.428046	0.410459
3.29091	0.0958086	0.424861	0.422151
3.29528	0.0926512	0.421475	0.430688
3.29966	0.0902347	0.418101	0.437174
3.30403	0.0885307	0.414839	0.442645
3.30841	0.0875396	0.411688	0.448239
3.31279	0.0870156	0.408448	0.453819
3.31716	0.0868127	0.404902	0.458692
3.32154	0.0867326	0.401017	0.461709
3.32592	0.0867324	0.396959	0.462204
3.33029	0.0868509	0.392979	0.460161
3.33467	0.0871352	0.389414	0.456028
3.33905	0.0876199	0.386397	0.450779
3.34342	0.0882556	0.384017	0.445108
3.3478	0.0888922	0.382155	0.439366
3.35217	0.0893956	0.380842	0.433627
3.35655	0.0896426	0.380038	0.427978
3.36093	0.0895861	0.379832	0.42293
3.3653	0.0892693	0.380149	0.419749
3.36968	0.0888246	0.380952	0.419617
3.37405	0.0882865	0.382135	0.422255
3.37843	0.0876838	0.383676	0.425648
3.38281	0.0868858	0.385537	0.428242
3.38718	0.0858382	0.387652	0.428728
3.39156	0.0844857	0.389955	0.427127
3.39594	0.0829574	0.392504	0.424551
3.40031	0.0815171	0.395423	0.422204
3.40469	0.0804067	0.398954	0.420847
3.40906	0.0798266	0.40335	0.420492
3.41344	0.0797249	0.4088	0.420704
3.41782	0.079989	0.415359	0.420609
3.42219	0.0804998	0.422987	0.419142
3.42657	0.0811114	0.431578	0.415012
3.43094	0.0817478	0.440997	0.407204
3.43532	0.0822786	0.451138	0.396074
3.4397	0.0826874	0.461942	0.383039
3.44407	0.083032	0.473391	0.371791
3.44845	0.0834083	0.485436	0.364327
3.45283	0.0837432	0.497992	0.361871
3.4572	0.0839489	0.510947	0.363216
3.46158	0.0838441	0.524001	0.366094
3.46596	0.0832589	0.5369	0.36835
3.47033	0.0821853	0.549459	0.368157
3.47471	0.0806787	0.56175	0.365197
3.47908	0.0790207	0.574003	0.360042
3.48346	0.0773539	0.586452	0.353782
3.48784	0.0757773	0.599304	0.347034
3.49221	0.0743049	0.612551	0.340398
3.49659	0.0728684	0.626113	0.333696
3.50096	0.0715255	0.63976	0.326014
3.50534	0.0703975	0.653332	0.316458
3.50972	0.0695773	0.666768	0.304287
3.51409	0.0692321	0.680278	0.289993
3.51847	0.0694813	0.694292	0.274833
3.52284	0.0702975	0.709208	0.260618
3.52722	0.071523	0.7254	0.24844
3.5316	0.0728829	0.74303	0.238308
3.53597	0.0741092	0.761903	0.229545
3.54035	0.0750216	0.781693	0.221344
3.54473	0.0756565	0.801497	0.212982
3.5491	0.0762169	0.820594	0.204633
3.55348	0.0769742	0.838334	0.197379
3.55785	0.0781262	0.854429	0.192074
3.56223	0.0797068	0.868923	0.189418
3.56661	0.0816177	0.882149	0.189393
3.57098	0.0836552	0.894424	0.191241
3.57536	0.0857581	0.905967	0.193495
3.57974	0.0877822	0.916572	0.194515
3.58411	0.089712	0.925763	0.193501
3.58849	0.0915666	0.933024	0.190489
3.59287	0.0934105	0.938095	0.18628
3.59724	0.095359	0.940939	0.182234
3.60162	0.097456	0.942033	0.18011
3.60599	0.0996274	0.941815	0.180862
3.61037	0.101604	0.941221	0.184547
3.61475	0.103164	0.940706	0.190258
3.61912	0.104116	0.940575	0.196711
3.6235	0.104505	0.940731	0.202808
3.62787	0.104416	0.941008	0.207866
3.63225	0.103901	0.940972	0.211297
3.63663	0.1029	0.940329	0.212507
3.641	0.101327	0.938762	0.211668
3.64538	0.0991396	0.936237	0.209048
3.64975	0.0964305	0.93279	0.204686
3.65413	0.093413	0.928597	0.19932
3.65851	0.0903142	0.923551	0.193714
3.66288	0.0873847	0.917412	0.188887
3.66726	0.0848097	0.909834	0.185132
3.67164	0.0827611	0.900596	0.182954
3.67601	0.08135	0.889709	0.182778
3.68039	0.0806707	0.877647	0.185195
3.68477	0.0806459	0.864984	0.190376
3.68914	0.081166	0.85238	0.19805
3.69352	0.082176	0.840004	0.206193
3.69789	0.0837214	0.828075	0.213919
3.70227	0.0859716	0.81639	0.21996
3.70665	0.0889126	0.804985	0.224352
3.71102	0.0923943	0.793712	0.226869
3.7154	0.0960855	0.782554	0.228342
3.71977	0.0995757	0.771373	0.22889
3.72415	0.102529	0.760175	0.229013
3.72853	0.104687	0.749147	0.22797
3.7329	0.105935	0.73858	0.225144
3.73728	0.106326	0.728859	0.219442
3.74166	0.106085	0.720159	0.210097
3.74603	0.105497	0.712425	0.196505
3.75041	0.104938	0.705248	0.178751
3.75478	0.104612	0.698126	0.15773
3.75916	0.104618	0.690902	0.135859
3.76354	0.104877	0.683544	0.114844
3.76791	0.105131	0.676392	0.097095
3.77229	0.105279	0.669602	0.083649
3.77666	0.105288	0.663321	0.075022
3.78104	0.105217	0.657406	0.070598
3.78542	0.105202	0.651839	0.069416
3.78979	0.105347	0.646605	0.070016
3.79417	0.105857	0.641733	0.071573
3.79855	0.10689	0.637134	0.073271
3.80292	0.108542	0.632539	0.074888
3.8073	0.110747	0.627655	0.076149
3.81168	0.11321	0.622128	0.077207
3.81605	0.115482	0.615925	0.078251
3.82043	0.117125	0.609137	0.079
3.8248	0.117881	0.601872	0.079226
3.82918	0.11772	0.594171	0.078764
3.83356	0.116894	0.58605	0.077752
3.83793	0.115641	0.57758	0.076202
3.84231	0.114226	0.568955	0.074626
3.84668	0.112843	0.560396	0.073429
3.85106	0.111592	0.552022	0.073091
3.85544	0.110505	0.543794	0.073517
3.85981	0.10948	0.535594	0.074575
3.86419	0.108398	0.527233	0.076058
3.86856	0.1072	0.518685	0.077631
3.87294	0.105984	0.509861	0.079476
3.87732	0.104964	0.500805	0.081566
3.88169	0.104451	0.491609	0.084073
3.88607	0.104684	0.482487	0.086917
3.89045	0.105615	0.473672	0.089666
3.89482	0.106949	0.465451	0.091994
3.8992	0.108361	0.457927	0.093279
3.90358	0.109618	0.451033	0.093243
3.90795	0.110639	0.444643	0.091732
3.91233	0.111489	0.438697	0.088652
3.9167	0.11208	0.433195	0.084031
3.92108	0.112399	0.428202	0.078335
3.92546	0.112416	0.423695	0.072025
3.92983	0.112275	0.419565	0.065911
3.93421	0.112064	0.415598	0.060773
3.93858	0.111852	0.411721	0.05698
3.94296	0.111646	0.407985	0.054615
3.94734	0.111351	0.404526	0.053455
3.95171	0.1109	0.40146	0.053275
3.95609	0.110243	0.398929	0.054016
3.96047	0.109603	0.39695	0.055776
3.96484	0.109118	0.395549	0.058298
3.96922	0.108972	0.39483	0.061368
3.97359	0.109138	0.394846	0.064746
3.97797	0.109458	0.395634	0.068343
3.98235	0.109865	0.397057	0.072169
3.98672	0.110236	0.398913	0.076879
3.9911	0.11048	0.400957	0.082654
3.99547	0.110453	0.403028	0.089372
3.99985	0.11003	0.404981	0.096392
4.00423	0.109101	0.406644	0.102835
4.0086	0.107674	0.407961	0.107801
4.01298	0.10595	0.408896	0.110567
4.01736	0.104127	0.40965	0.111457
4.02173	0.102461	0.410346	0.11121
4.02611	0.100947	0.411131	0.110589
4.03048	0.0994691	0.412025	0.110629
4.03486	0.0977479	0.412889	0.111799
4.03924	0.095709	0.413486	0.114297
4.04361	0.0934187	0.413624	0.117694
4.04799	0.0911471	0.413265	0.121859
4.05237	0.0892027	0.412748	0.126024
4.05674	0.0878429	0.412478	0.129838
4.06112	0.0871774	0.413058	0.132779
4.0655	0.0871972	0.414939	0.134719
4.06987	0.0877873	0.418447	0.135632
4.07425	0.0887015	0.423428	0.135951
4.07862	0.0897016	0.429393	0.136671
4.083	0.0905338	0.435609	0.138325
4.08738	0.091104	0.441439	0.141109
4.09175	0.0914466	0.446475	0.144896
4.09613	0.0917217	0.450678	0.149245
4.1005	0.0922045	0.454246	0.153965
4.10488	0.0930849	0.457495	0.15887
4.10926	0.0945154	0.460709	0.163905
4.11363	0.0966016	0.46405	0.168583
4.11801	0.0993287	0.467497	0.17234
4.12239	0.102605	0.470951	0.175122
4.12676	0.106182	0.474197	0.178183
4.13114	0.109742	0.477079	0.183266
4.13551	0.113003	0.47953	0.19208
4.13989	0.115745	0.481756	0.205123
4.14427	0.117822	0.484006	0.220689
4.14864	0.119306	0.486483	0.236885
4.15302	0.120322	0.489152	0.251402
4.1574	0.120979	0.491885	0.262809
4.16177	0.121499	0.494464	0.271072
4.16615	0.121864	0.496856	0.276668
4.17052	0.122022	0.499171	0.280417
4.1749	0.121789	0.501443	0.283253
4.17928	0.12094	0.503607	0.285838
4.18365	0.119404	0.505294	0.288837
4.18803	0.1172	0.506234	0.292639
4.1924	0.114495	0.506248	0.297479
4.19678	0.111618	0.505461	0.303859
4.20116	0.108968	0.504062	0.312321
4.20553	0.106843	0.50209	0.323293
4.20991	0.105497	0.499541	0.336644
4.21429	0.105015	0.496214	0.351888
4.21866	0.105385	0.492102	0.367617
4.22304	0.10649	0.487253	0.382907
4.22741	0.108046	0.482109	0.39719
4.23179	0.109902	0.476832	0.410586
4.23617	0.111943	0.47156	0.423761
4.24054	0.114295	0.466352	0.437304
4.24492	0.117134	0.461258	0.45125
4.2493	0.120615	0.456545	0.464771
4.25367	0.124743	0.452371	0.47618
4.25805	0.129376	0.448755	0.483518
4.26242	0.134243	0.445377	0.484843
4.2668	0.138992	0.441745	0.47972
4.27118	0.143401	0.437469	0.469257
4.27555	0.147203	0.432311	0.456488
4.27993	0.1502	0.426428	0.444095
4.2843	0.152199	0.4202	0.434893
4.28868	0.153251	0.414031	0.430285
4.29306	0.153567	0.407947	0.429934
4.29743	0.153505	0.401887	0.433586
4.30181	0.153363	0.395574	0.440319
4.30619	0.153259	0.388685	0.450047
4.31056	0.153233	0.381044	0.463257
4.31494	0.153198	0.37256	0.480755
4.31931	0.153109	0.363369	0.503974
4.32369	0.152938	0.353568	0.532558
4.32807	0.152622	0.343421	0.56469
4.33244	0.151995	0.333197	0.597183
4.33682	0.150937	0.32326	0.62661
4.3412	0.149515	0.313957	0.65124
4.34557	0.147888	0.3055	0.67174
4.34995	0.146383	0.297765	0.69058
4.35432	0.145277	0.290401	0.709979
4.3587	0.1448	0.28297	0.731039
4.36308	0.144998	0.275143	0.752598
4.36745	0.146027	0.266888	0.771517
4.37183	0.147881	0.258438	0.78653
4.3762	0.150303	0.250199	0.796737
4.38058	0.152955	0.242407	0.80345
4.38496	0.155485	0.235176	0.806541
4.38933	0.157747	0.22857	0.807512
4.39371	0.159824	0.222474	0.805892
4.39809	0.161957	0.216839	0.802006
4.40246	0.164429	0.211362	0.795634
4.40684	0.167223	0.205915	0.786566
4.41122	0.170263	0.200265	0.773599
4.41559	0.173224	0.194426	0.755735
4.41997	0.17566	0.18856	0.733402
4.42434	0.177079	0.182954	0.707872
4.42872	0.177247	0.177923	0.680944
4.4331	0.175974	0.173621	0.654778
4.43747	0.173393	0.170041	0.628673
4.44185	0.169829	0.166933	0.601829
4.44623	0.165766	0.164023	0.572567
4.4506	0.16162	0.160964	0.541469
4.45498	0.157665	0.157497	0.508846
4.45935	0.154098	0.15357	0.477691
4.46373	0.151102	0.149215	0.449506
4.46811	0.148695	0.144741	0.425248
4.47248	0.146869	0.140306	0.404157
4.47686	0.145521	0.136136	0.385353
4.48123	0.14448	0.132267	0.367413
4.48561	0.143786	0.12871	0.349352
4.48999	0.143401	0.125377	0.330122
4.49436	0.143366	0.122202	0.309674
4.49874	0.143669	0.119115	0.288744
4.50312	0.144274	0.116111	0.268691
4.50749	0.145108	0.11322	0.250235
4.51187	0.145955	0.110459	0.233371
4.51624	0.146833	0.107831	0.217445
4.52062	0.147774	0.105313	0.202045
4.525	0.149001	0.102839	0.187236
4.52937	0.150541	0.100366	0.174027
4.53375	0.152495	0.097862	0.163899
4.53812	0.154832	0.095375	0.158163
4.5425	0.157476	0.092971	0.156632
4.54688	0.160416	0.090692	0.158631
4.55125	0.163638	0.088475	0.162231
4.55563	0.167255	0.086262	0.166185
4.56001	0.171183	0.083936	0.169619
4.56438	0.175348	0.081461	0.172723
4.56876	0.179633	0.078888	0.175903
4.57313	0.184009	0.076299	0.180151
4.57751	0.188538	0.073842	0.185346
4.58189	0.193009	0.071643	0.191116
4.58626	0.197079	0.069815	0.196871
4.59064	0.200106	0.068392	0.201791
4.59502	0.201703	0.067317	0.205163
4.59939	0.201698	0.066464	0.206367
4.60377	0.200565	0.065668	0.204857
4.60814	0.198808	0.064803	0.200811
4.61252	0.19722	0.063822	0.194878
4.6169	0.196183	0.062769	0.187783
4.62127	0.195999	0.061713	0.180774
4.62565	0.19683	0.060741	0.174332
4.63002	0.198687	0.05984	0.168685
4.6344	0.201463	0.058932	0.163531
4.63878	0.204845	0.057918	0.157878
4.64315	0.208446	0.056693	0.151793
4.64753	0.212113	0.055237	0.145261
4.65191	0.215883	0.053545	0.138672
4.65628	0.219995	0.051711	0.13226
4.66066	0.224892	0.049854	0.126344
4.66503	0.230823	0.048113	0.121091
4.66941	0.237818	0.046557	0.116924
4.67379	0.245732	0.045169	0.114071
4.67816	0.254117	0.043895	0.11283
4.68254	0.262455	0.042679	0.113228
4.68692	0.270278	0.041488	0.114709
4.69129	0.276992	0.040323	0.116347
4.69567	0.282383	0.039232	0.1173
4.70004	0.286446	0.038234	0.116799
4.70442	0.289506	0.037342	0.11518
4.7088	0.292101	0.036552	0.112868
4.71317	0.294581	0.035841	0.110305
4.71755	0.297332	0.035198	0.107418
4.72193	0.300597	0.034593	0.103967
4.7263	0.304467	0.034031	0.0999
4.73068	0.309209	0.033496	0.095182
4.73505	0.314848	0.033029	0.090073
4.73943	0.321452	0.032688	0.084918
4.74381	0.32874	0.03255	0.079786
4.74818	0.336148	0.032675	0.07474
4.75256	0.342724	0.03312	0.069687
4.75694	0.347861	0.033879	0.065119
4.76131	0.351311	0.034926	0.061608
4.76569	0.353291	0.036197	0.059679
4.77006	0.354535	0.037615	0.059559
4.77444	0.355567	0.039095	0.060719
4.77882	0.356877	0.040574	0.062733
4.78319	0.358612	0.042058	0.065075
4.78757	0.360633	0.043569	0.067435
4.79195	0.362654	0.045111	0.069338
4.79632	0.364292	0.046682	0.071188
4.8007	0.365183	0.048218	0.073065
4.80507	0.365093	0.049646	0.075151
4.80945	0.364104	0.0509	0.077261
4.81383	0.362756	0.051955	0.079353
4.8182	0.361912	0.052774	0.081218
4.82258	0.362258	0.053371	0.082311
4.82695	0.363932	0.053701	0.082032
4.83133	0.366616	0.053759	0.080143
4.83571	0.3696	0.053553	0.076293
4.84008	0.372497	0.053134	0.071149
4.84446	0.375183	0.052604	0.065363
4.84884	0.377624	0.052014	0.059708
4.85321	0.379754	0.051377	0.05487
4.85759	0.381297	0.050687	0.051156
4.86196	0.381956	0.049924	0.048121
4.86634	0.381853	0.049103	0.04518
4.87072	0.381339	0.048215	0.041925
4.87509	0.381038	0.047264	0.038259
4.87947	0.381231	0.046187	0.033901
4.88384	0.381902	0.044962	0.029291
4.88822	0.382798	0.043556	0.024848
4.8926	0.383835	0.042038	0.021018
4.89697	0.385205	0.04054	0.017856
4.90135	0.387226	0.039228	0.015606
4.90573	0.390234	0.038221	0.014109
4.9101	0.394346	0.037511	0.013092
4.91448	0.399556	0.037011	0.012396
4.91885	0.40579	0.036592	0.011713
4.92323	0.412928	0.036121	0.010917
4.92761	0.420738	0.035504	0.009851
4.93198	0.428964	0.034733	0.008713
4.93636	0.43697	0.033865	0.007687
4.94074	0.444053	0.03296	0.006781
4.94511	0.449762	0.032097	0.006126
4.94949	0.453813	0.031305	0.005706
4.95386	0.456333	0.030575	0.005452
4.95824	0.457639	0.029852	0.005198
4.96262	0.458168	0.029042	0.004944
4.96699	0.458676	0.02805	0.004597
4.97137	0.459339	0.026829	0.004088
4.97574	0.460168	0.025401	0.003464
4.98012	0.460887	0.023839	0.002702
4.9845	0.461355	0.022235	0.001939
4.98887	0.461646	0.020681	0.001208
4.99325	0.462084	0.019232	0.000896
4.99763	0.463096	0.017882	0.000969
5.002	0.465293	0.016612	0.001369
5.00638	0.469408	0.015395	0.002087
5.01075	0.47589	0.014201	0.003263
5.01513	0.485254	0.013029	0.004533
5.01951	0.497683	0.011891	0.005804
5.02388	0.512953	0.010818	0.006926
5.02826	0.530263	0.009829	0.007831
5.03264	0.548146	0.008939	0.00852
5.03701	0.565371	0.008131	0.008993
5.04139	0.580904	0.007386	0.009249
5.04577	0.594112	0.006673	0.009503
5.05014	0.60496	0.005985	0.009757
5.05452	0.613894	0.005322	0.010012
5.05889	0.621625	0.004703	0.010057
5.06327	0.628543	0.004147	0.009918
5.06765	0.635027	0.003653	0.009492
5.07202	0.640852	0.003223	0.008671
5.0764	0.645976	0.002863	0.007495
5.08077	0.650139	0.002556	0.006224
5.08515	0.653421	0.002299	0.005009
5.08953	0.65593	0.002076	0.00397
5.0939	0.658239	0.001874	0.003163
5.09828	0.660831	0.001681	0.002474
5.10266	0.663892	0.001488	0.002001
5.10703	0.667566	0.001294	0.001745
5.11141	0.672149	0.001112	0.001491
5.11578	0.677695	0.000946	0.001237
5.12016	0.68419	0.000802	0.000982
5.12454	0.691523	0.00069	0.000728
5.12891	0.699529	0.000607	0.000478
5.13329	0.708099	0.000563	0.000249
5.13767	0.717289	0.000541	0.000237
5.14204	0.726818	0.000535	0.000237
5.14642	0.7365	0.000541	0.000237
5.15079	0.746017	0.000554	0.000181
5.15517	0.754915	0.000566	9.82e-05
5.15955	0.7626	0.00058	0
5.16392	0.768576	0.000591	0
5.1683	0.7729	0.000601	0
5.17267	0.775999	0.000606	0
5.17705	0.77857	0.000604	0
5.18143	0.781459	0.000603	0
5.1858	0.785051	0.000599	0
5.19018	0.789045	0.000597	0
5.19456	0.793011	0.000594	0
5.19893	0.796289	0.000581	0
5.20331	0.798412	0.000565	0
5.20768	0.799618	0.000545	0
5.21206	0.800114	0.000525	0
5.21644	0.800109	0.000504	0
5.22081	0.799809	0.000484	0
5.22519	0.799368	0.000471	0
5.22957	0.799147	0.000461	0
5.23394	0.799727	0.000454	0
5.23832	0.801422	0.00045	0
5.24269	0.804776	0.000446	0
5.24707	0.809753	0.000437	2.68e-06
5.25145	0.816781	0.000431	0.000239
5.25582	0.826084	0.000412	0.000493
5.2602	0.837363	0.000393	0.000748
5.26457	0.849772	0.000378	0.001002
5.26895	0.861896	0.00037	0.001256
5.27333	0.872275	0.000368	0.00151
5.2777	0.880358	0.000368	0.001764
5.28208	0.886558	0.000364	0.002018
5.28646	0.891764	0.000359	0.002273
5.29083	0.897346	0.000341	0.002527
5.29521	0.904124	0.000321	0.002781
5.29959	0.912255	0.000297	0.003035
5.30396	0.921216	0.000267	0.003289
5.30834	0.929375	0.000241	0.003457
5.31271	0.935194	0.000221	0.003461
5.31709	0.937015	0.000201	0.003224
5.32147	0.934324	0.000192	0.00297
5.32584	0.927649	0.000184	0.002798
5.33022	0.919077	0.000174	0.002798
5.33459	0.9109	0.000163	0.002798
5.33897	0.905042	0.000153	0.002798
5.34335	0.901851	0.000146	0.002983
5.34772	0.900145	0.000149	0.003211
5.3521	0.89844	0.00016	0.003266
5.35647	0.894947	0.000179	0.003266
5.36085	0.888736	0.000192	0.003266
5.36523	0.879618	0.000205	0.003266
5.3696	0.86811	0.000224	0.00342
5.37398	0.855072	0.000241	0.00374
5.37836	0.841156	0.000258	0.004242
5.38273	0.826425	0.000278	0.004673
5.38711	0.810478	0.000293	0.005021
5.39149	0.792668	0.000303	0.005357
5.39586	0.771962	0.000313	0.005387
5.40024	0.748133	0.000314	0.005387
5.40461	0.721117	0.000305	0.005387
5.40899	0.692113	0.000294	0.005085
5.41337	0.662448	0.000282	0.004605
5.41774	0.633526	0.000276	0.004296
5.42212	0.606085	0.000268	0.004042
5.4265	0.580344	0.000275	0.003788
5.43087	0.555725	0.000287	0.003534
5.43525	0.531547	0.000298	0.003125
5.43962	0.50728	0.000306	0.002637
5.444	0.482976	0.000307	0.002129
5.44838	0.459128	0.000298	0.001698
5.45275	0.43634	0.000288	0.00135
5.45713	0.415039	0.000278	0.000933
5.4615	0.39537	0.000267	0.000648
5.46588	0.37701	0.000261	0.000394
5.47026	0.359722	0.000256	0.00014
5.47463	0.342954	0.000246	2.59e-06
5.47901	0.326477	0.000232	0
5.48339	0.309921	0.000212	0
5.48776	0.293108	0.000191	0
5.49214	0.275911	0.00017	0
5.49651	0.258464	0.00015	0
5.50089	0.241021	0.000133	0
5.50527	0.223955	0.000128	0
5.50964	0.207504	0.000131	0
5.51402	0.192029	0.00014	0
5.51839	0.177586	0.00015	0
5.52277	0.164275	0.000159	0
5.52715	0.152051	0.000171	0
5.53152	0.140896	0.000176	0
5.5359	0.130761	0.000181	0
5.54028	0.121507	0.000188	0
5.54465	0.112999	0.000198	0
5.54903	0.105055	0.000208	7.09e-05
5.5534	0.0975669	0.000218	0.000304
5.55778	0.0904316	0.000224	0.000559
5.56216	0.0837196	0.000237	0.000802
5.56653	0.0775486	0.00025	0.001021
5.57091	0.0720609	0.00026	0.001023
5.57529	0.0673578	0.00027	0.001023
5.57966	0.0632764	0.00028	0.001023
5.58404	0.0597021	0.000285	0.001023
5.58841	0.0564225	0.000285	0.001023
5.59279	0.0532248	0.000278	0.001023
5.59717	0.0500042	0.000273	0.001023
5.60154	0.046705	0.000273	0.001023
5.60592	0.0433509	0.000273	0.001023
5.61029	0.0400086	0.000266	0.001023
5.61467	0.0367754	0.000258	0.000973
5.61905	0.0337483	0.000255	0.000914
5.62342	0.0309586	0.00025	0.000914
5.6278	0.0284113	0.000238	0.000925
5.63218	0.0260623	0.000221	0.000961
5.63655	0.0238723	0.000201	0.001213
5.64093	0.0218526	0.000181	0.001467
5.6453	0.0200813	0.000161	0.001702
5.64968	0.0185735	0.000146	0.001906
5.65406	0.0173493	0.000134	0.002133
5.65843	0.0163958	0.000121	0.002385
5.66281	0.0156215	0.000111	0.002627
5.66719	0.0149752	0.000101	0.002881
5.67156	0.0144086	9.08e-05	0.002991
5.67594	0.0138779	8.73e-05	0.002991
5.68031	0.0134066	8.57e-05	0.00297
5.68469	0.0129956	7.88e-05	0.002795
5.68907	0.0126804	6.87e-05	0.002541
5.69344	0.0124594	5.87e-05	0.002287
5.69782	0.0122932	4.87e-05	0.002033
5.70219	0.0121542	3.86e-05	0.001779
5.70657	0.0119818	3.06e-05	0.001524
5.71095	0.0116761	2.62e-05	0.001289
5.71532	0.0111895	1.87e-05	0.001085
5.7197	0.0105064	1.8e-05	0.000858
5.72408	0.00967169	2.25e-05	0.000667
5.72845	0.00873961	2.55e-05	0.000635
5.73283	0.00781962	2.55e-05	0.000635
5.73721	0.00697232	2.55e-05	0.000856
5.74158	0.00628808	2.55e-05	0.001364
5.74596	0.0057348	2.55e-05	0.001882
5.75033	0.00529166	2.55e-05	0.00263
5.75471	0.00490929	2.55e-05	0.003392
5.75909	0.0045766	2.55e-05	0.004155
5.76346	0.00424495	2.55e-05	0.004799
5.76784	0.00394263	2.55e-05	0.005307
5.77222	0.0036778	2.35e-05	0.005794
5.77659	0.00348363	1.79e-05	0.006147
5.78097	0.00333902	1.54e-05	0.006401
5.78534	0.00322528	7.58e-06	0.006655
5.78972	0.00311236	9.42e-06	0.006848
5.7941	0.00299823	1.64e-05	0.006995
5.79847	0.00289185	2.65e-05	0.007203
5.80285	0.00275701	3.65e-05	0.007388
5.80722	0.0026374	4.65e-05	0.007385
5.8116	0.00251857	5.65e-05	0.007375
5.81598	0.00243801	6.66e-05	0.007049
5.82035	0.00238114	7.66e-05	0.006687
5.82473	0.00231212	8.81e-05	0.00637
5.82911	0.00227422	0.000105	0.006234
5.83348	0.00224033	0.00012	0.006234
5.83786	0.00219934	0.00014	0.006255
5.84223	0.00218836	0.000152	0.006411
5.84661	0.00220518	0.000162	0.006508
5.85099	0.00222466	0.000172	0.006508
5.85536	0.00226171	0.000173	0.006426
5.85974	0.00230978	0.000168	0.006069
5.86411	0.00232926	0.000158	0.005606
5.86849	0.00234092	0.000157	0.005091
5.87287	0.00228472	0.000157	0.004586
5.87724	0.00221543	0.000157	0.004077
5.88162	0.0021217	0.000157	0.003656
5.886	0.00198356	0.000157	0.003255
5.89037	0.00184499	0.000155	0.002811
5.89475	0.00171393	0.000148	0.002302
5.89912	0.00157535	0.000143	0.001794
5.9035	0.00142846	0.000134	0.001286
5.90788	0.00125227	0.000131	0.000777
5.91225	0.00107911	0.000131	0.000516
5.91663	0.000942149	0.000131	0.000516
5.92101	0.000840464	0.000133	0.000598
5.92538	0.000757752	0.000129	0.000852
5.92976	0.000706076	0.000129	0.001106
5.93413	0.000666747	0.00012	0.00136
5.93851	0.000658779	0.00011	0.001607
5.94289	0.000641219	9.97e-05	0.001676
5.94726	0.000608362	8.97e-05	0.001676
5.95164	0.00060793	7.96e-05	0.001676
5.95601	0.00060793	6.96e-05	0.001676
5.96039	0.000583658	5.96e-05	0.001676
5.96477	0.000549014	4.95e-05	0.001676
5.96914	0.000514371	3.95e-05	0.001676
5.97352	0.000463559	2.95e-05	0.001676
5.9779	0.000394273	1.95e-05	0.001586
5.98227	0.000341282	9.45e-06	0.001332
5.98665	0.000291829	7.58e-06	0.001078
5.99102	0.000262232	1.73e-05	0.000824
5.9954	0.000238925	2.73e-05	0.00057
5.99978	0.000244914	4.16e-05	0.000315
6.00415	0.000244914	6.11e-05	6.88e-05
6.00853	0.000262475	8.11e-05	0
6.01291	0.000297118	0.000101	0
6.01728	0.000331762	0.000112	0
6.02166	0.000344852	0.000122	0
6.02604	0.000344852	0.000132	0
6.03041	0.000344852	0.000138	0
6.03479	0.000360306	0.000138	0
6.03916	0.000394949	0.000138	0
6.04354	0.000429593	0.000138	0
6.04792	0.000440124	0.000138	0.000197
6.05229	0.000440124	0.000131	0.000452
6.05667	0.000435077	0.000125	0.000642
6.06104	0.000423741	0.00012	0.000698
6.06542	0.000382079	0.000115	0.000698
6.0698	0.000347436	0.000106	0.000698
6.07417	0.000312792	9.54e-05	0.000698
6.07855	0.000278149	8.54e-05	0.000698
6.08293	0.000253911	8.04e-05	0.000698
6.0873	0.000275464	7.11e-05	0.000698
6.09168	0.000310107	6.26e-05	0.000814
6.09605	0.00034475	5.79e-05	0.001065
6.10043	0.000363939	6.78e-05	0.001319
6.10481	0.000356226	7.79e-05	0.001573
6.10918	0.000330897	8.79e-05	0.001827
6.11356	0.000296254	9.79e-05	0.001884
6.11794	0.000261611	0.000108	0.001884
6.12231	0.000226968	0.000114	0.001859
6.12669	0.000192325	0.00012	0.001802
6.13106	0.000185222	0.00012	0.001802
6.13544	0.000185222	0.000117	0.001802
6.13982	0.000185222	0.000118	0.001802
6.14419	0.000185222	0.000118	0.001802
6.14857	0.000200382	0.000123	0.001802
6.15294	0.000200382	0.000141	0.001802
6.15732	0.000200382	0.000159	0.001686
6.1617	0.000200382	0.000178	0.001436
6.16607	0.000200382	0.000192	0.001182
6.17045	0.000208095	0.000203	0.000928
6.17483	0.000233424	0.000213	0.000674
6.1792	0.000268067	0.000223	0.000419
6.18358	0.00030271	0.000228	0.000165
6.18795	0.000337354	0.000228	0
6.19233	0.000371997	0.000228	0
6.19671	0.00040664	0.000228	0
6.20108	0.000442839	0.000231	0
6.20546	0.000477482	0.000231	0
6.20983	0.000512125	0.000233	0
6.21421	0.000521203	0.000242	0
6.21859	0.000521203	0.000243	0
6.22296	0.000521203	0.000243	0
6.22734	0.000521315	0.000248	0
6.23172	0.000521443	0.000247	0
6.23609	0.000521592	0.000246	0
6.24047	0.000521769	0.000245	0
6.24484	0.000521981	0.000237	0
6.24922	0.00052224	0.000232	0
6.2536	0.000522564	0.000224	0
6.25797	0.000522981	0.000214	0
6.26235	0.000523537	0.000204	0
6.26673	0.000519648	0.000194	0
6.2711	0.000519648	0.000184	0
6.27548	0.000519648	0.000172	0
6.27986	0.000519648	0.000152	0
6.28423	0.000519648	0.000132	0
6.28861		0.000113	0
6.29298		9.63e-05	0
6.29736		8.28e-05	0
6.30174		7.28e-05	0
6.30611		6.35e-05	0
6.31049		6.22e-05	0
6.31486		6.3e-05	0
6.31924		7.01e-05	0
6.32362		8.01e-05	0
6.32799		9.01e-05	0
6.33237		0.0001	0
6.33674		0.00011	0
6.34112		0.000119	0

## Sheet: Figure 2L
	GFP	CD81	LC3B
0.078058	0.001175	0.002529	0
0.083633	0.001215	0.002526	0
0.089209	0.001309	0.0025	0.00011
0.094785	0.001444	0.002448	0.000326
0.10036	0.001613	0.002375	0.000541
0.105936	0.001798	0.002281	0.000883
0.111511	0.001963	0.002177	0.001209
0.117087	0.002097	0.002083	0.00155
0.122662	0.002187	0.002042	0.001891
0.128238	0.002233	0.00203	0.00214
0.133814	0.002254	0.002066	0.002356
0.139389	0.002265	0.002186	0.002571
0.144965	0.002277	0.002359	0.002695
0.15054	0.002288	0.002558	0.002695
0.156116	0.00228	0.002786	0.002695
0.161691	0.002244	0.002991	0.002695
0.167267	0.002182	0.003192	0.002584
0.172843	0.002089	0.003344	0.002369
0.178418	0.001957	0.003419	0.002153
0.183994	0.001809	0.003443	0.001812
0.189569	0.001651	0.003464	0.001486
0.195145	0.001503	0.003501	0.001144
0.20072	0.001385	0.003541	0.000856
0.206296	0.00128	0.003582	0.000615
0.211872	0.001194	0.00363	0.000552
0.217447	0.001119	0.00362	0.000496
0.223023	0.001042	0.003553	0.000558
0.228598	0.000962	0.003402	0.000732
0.234174	0.000891	0.003208	0.000819
0.239749	0.000822	0.003011	0.000842
0.245325	0.000738	0.002811	0.000842
0.2509	0.000652	0.002693	0.000959
0.256476	0.000578	0.002663	0.001174
0.262052	0.000519	0.0027	0.00139
0.267627	0.000491	0.002767	0.001738
0.273203	0.000498	0.002788	0.002069
0.278778	0.000526	0.002772	0.002362
0.284354	0.000572	0.00273	0.00257
0.289929	0.000626	0.002681	0.002646
0.295505	0.000669	0.002659	0.002702
0.301081	0.000714	0.002711	0.00267
0.306656	0.000747	0.002859	0.002496
0.312232	0.000749	0.003018	0.002409
0.317807	0.000732	0.003183	0.002386
0.323383	0.00071	0.003338	0.002386
0.328958	0.000689	0.003404	0.002269
0.334534	0.000667	0.003431	0.002054
0.34011	0.000646	0.003434	0.001838
0.345685	0.000624	0.003419	0.00149
0.351261	0.000605	0.003464	0.001159
0.356836	0.000584	0.003525	0.000813
0.362412	0.000569	0.003622	0.000598
0.367987	0.000557	0.003707	0.000369
0.373563	0.000576	0.003767	0.000154
0.379139	0.000596	0.003748	9.14e-05
0.384714	0.000625	0.003667	0.000307
0.39029	0.000652	0.003588	0.000523
0.395865	0.000692	0.003516	0.000738
0.401441	0.000735	0.00348	0.000954
0.407016	0.000777	0.003479	0.001179
0.412592	0.000813	0.003492	0.00156
0.418167	0.000848	0.003506	0.001991
0.423743	0.000885	0.003506	0.002422
0.429319	0.000891	0.003504	0.002853
0.434894	0.000886	0.003526	0.003212
0.44047	0.000856	0.003567	0.003428
0.446045	0.000814	0.003647	0.003626
0.451621	0.000753	0.00378	0.003647
0.457196	0.000691	0.003957	0.003556
0.462772	0.000647	0.004161	0.00334
0.468348	0.000621	0.004362	0.003227
0.473923	0.0006	0.004545	0.003095
0.479499	0.000578	0.004669	0.003065
0.485074	0.000546	0.004781	0.003038
0.49065	0.00051	0.004852	0.002873
0.496225	0.000476	0.004895	0.002648
0.501801	0.000441	0.004899	0.002356
0.507377	0.00042	0.004834	0.001925
0.512952	0.00042	0.004686	0.001566
0.518528	0.000441	0.004481	0.00135
0.524103	0.000463	0.004236	0.001152
0.529679	0.000483	0.003964	0.001131
0.535254	0.000502	0.003721	0.001131
0.54083	0.000506	0.003512	0.001131
0.546406	0.000503	0.00335	0.001029
0.551981	0.000485	0.003196	0.000945
0.557557	0.000463	0.003039	0.000759
0.563132	0.000453	0.002864	0.000561
0.568708	0.000453	0.00266	0.000346
0.574283	0.000452	0.002452	0.00014
0.579859	0.000453	0.002281	0
0.585434	0.000472	0.002156	0
0.59101	0.000476	0.002115	0
0.596586	0.000484	0.002117	0
0.602161	0.000498	0.002157	0
0.607737	0.000514	0.002195	0
0.613312	0.000536	0.002215	0
0.618888	0.000545	0.00222	0
0.624463	0.000548	0.002189	0
0.630039	0.000566	0.002169	0
0.635615	0.000588	0.002184	0
0.64119	0.000609	0.002209	0
0.646766	0.000631	0.002261	0
0.652341	0.000652	0.002322	0
0.657917	0.000671	0.002358	0
0.663492	0.000679	0.00239	2.62e-05
0.669068	0.000702	0.002391	3.66e-05
0.674644	0.000715	0.002376	3.66e-05
0.680219	0.000726	0.002357	6.76e-05
0.685795	0.000735	0.002367	9.86e-05
0.69137	0.000733	0.002388	9.86e-05
0.696946	0.000728	0.002416	0.000129
0.702521	0.000728	0.002428	0.000129
0.708097	0.000728	0.002401	0.000129
0.713672	0.000728	0.002342	0.000129
0.719248	0.000728	0.002266	0.000129
0.724824	0.000728	0.002212	0.000129
0.730399	0.000728	0.002183	0.000129
0.735975	0.000727	0.002238	0.000129
0.74155	0.00073	0.002338	0.000208
0.747126	0.000729	0.002458	0.000413
0.752701	0.000743	0.002551	0.000628
0.758277	0.000767	0.0026	0.000899
0.763853	0.000807	0.002587	0.001159
0.769428	0.000852	0.002516	0.00144
0.775004	0.000913	0.002408	0.001721
0.780579	0.000979	0.002306	0.001937
0.786155	0.001063	0.002233	0.002152
0.79173	0.001149	0.002187	0.002368
0.797306	0.00125	0.00218	0.002583
0.802882	0.001358	0.00218	0.002799
0.808457	0.001468	0.002151	0.003014
0.814033	0.001596	0.002055	0.00323
0.819608	0.001728	0.001914	0.003341
0.825184	0.001871	0.001753	0.003341
0.830759	0.002007	0.001637	0.00326
0.836335	0.002129	0.001567	0.002959
0.841911	0.002218	0.001551	0.002668
0.847486	0.002289	0.001592	0.002386
0.853062	0.002333	0.001672	0.002075
0.858637	0.002362	0.00178	0.00186
0.864213	0.002364	0.001901	0.001644
0.869788	0.002363	0.002009	0.001429
0.875364	0.002331	0.00209	0.001213
0.880939	0.002288	0.002171	0.000997
0.886515	0.002232	0.002282	0.000782
0.892091	0.002147	0.002442	0.000566
0.897666	0.002028	0.002624	0.000351
0.903242	0.001884	0.002832	0.000135
0.908817	0.001734	0.003057	0
0.914393	0.001585	0.003231	0
0.919968	0.001462	0.003377	0
0.925544	0.001369	0.003488	0
0.93112	0.001304	0.00357	0
0.936695	0.001252	0.003623	0
0.942271	0.001195	0.003671	0
0.947846	0.001131	0.003761	0
0.953422	0.001083	0.003904	0
0.958997	0.001039	0.004065	0
0.964573	0.001016	0.004206	0
0.970149	0.001007	0.004283	0
0.975724	0.001024	0.004294	0
0.9813	0.001059	0.004246	0
0.986875	0.001094	0.004137	0
0.992451	0.001128	0.004029	0
0.998026	0.001139	0.003934	0
1.0036	0.001122	0.003874	0
1.00918	0.001088	0.003843	0
1.01475	0.001045	0.003842	3.43e-05
1.02033	0.001015	0.003862	0.000219
1.0259	0.000994	0.003882	0.000434
1.03148	0.00098	0.003896	0.000657
1.03706	0.000981	0.003893	0.001044
1.04263	0.000989	0.003875	0.001475
1.04821	0.001006	0.003854	0.001907
1.05378	0.00103	0.003823	0.002331
1.05936	0.001038	0.003796	0.002563
1.06493	0.001057	0.003769	0.002778
1.07051	0.001087	0.003741	0.002994
1.07608	0.001131	0.003707	0.003209
1.08166	0.001195	0.003628	0.003425
1.08723	0.001267	0.00351	0.003641
1.09281	0.001346	0.003357	0.003822
1.09839	0.001406	0.003164	0.003853
1.10396	0.001463	0.002937	0.003853
1.10954	0.001513	0.002663	0.003846
1.11511	0.001547	0.002384	0.003674
1.12069	0.001572	0.002137	0.003458
1.12626	0.001596	0.00192	0.003243
1.13184	0.001635	0.001759	0.003034
1.13742	0.001705	0.00164	0.003018
1.14299	0.001796	0.001577	0.003011
1.14857	0.001928	0.001569	0.002832
1.15414	0.002102	0.001573	0.002617
1.15972	0.002306	0.001628	0.002401
1.16529	0.002526	0.00175	0.002186
1.17087	0.002732	0.001918	0.00197
1.17644	0.002927	0.002161	0.001754
1.18202	0.003094	0.002412	0.001539
1.1876	0.003245	0.00266	0.001323
1.19317	0.003405	0.002886	0.001108
1.19875	0.003555	0.003054	0.000892
1.20432	0.003701	0.003192	0.000677
1.2099	0.003811	0.003287	0.000461
1.21547	0.003869	0.003313	0.000246
1.22105	0.003865	0.003311	3.67e-05
1.22663	0.003778	0.003281	0
1.2322	0.003619	0.003254	0
1.23778	0.003413	0.003248	0
1.24335	0.003198	0.00324	0
1.24893	0.003	0.003233	0
1.2545	0.00285	0.00319	0
1.26008	0.002733	0.003154	0
1.26565	0.002645	0.00316	0
1.27123	0.002559	0.003189	0
1.2768	0.002486	0.003303	0
1.28238	0.002438	0.003447	0
1.28796	0.002437	0.003652	0
1.29353	0.002489	0.003963	0
1.29911	0.002602	0.004301	0
1.30468	0.002761	0.004642	0
1.31026	0.002946	0.00497	0
1.31583	0.003129	0.005237	0
1.32141	0.003298	0.005454	0
1.32699	0.003449	0.005638	0
1.33256	0.003592	0.005798	0
1.33814	0.003757	0.005985	0
1.34371	0.003957	0.006213	0
1.34929	0.004182	0.006507	0
1.35486	0.004443	0.006827	5.58e-05
1.36044	0.004738	0.0072	8.71e-05
1.36601	0.005049	0.007615	8.71e-05
1.37159	0.005396	0.008045	8.71e-05
1.37716	0.005792	0.00852	8.71e-05
1.38274	0.006245	0.009053	8.71e-05
1.38832	0.006786	0.009624	8.71e-05
1.39389	0.00744	0.010217	8.71e-05
1.39947	0.0082	0.010834	8.71e-05
1.40504	0.00907	0.011475	0.000158
1.41062	0.009991	0.012165	0.000374
1.41619	0.010896	0.012904	0.00061
1.42177	0.011728	0.0137	0.001001
1.42735	0.012488	0.014497	0.001549
1.43292	0.01315	0.015243	0.002197
1.4385	0.013745	0.015853	0.002884
1.44407	0.014307	0.016331	0.003456
1.44965	0.01483	0.016675	0.003879
1.45522	0.015332	0.016915	0.004153
1.4608	0.015811	0.017206	0.004368
1.46637	0.016283	0.017659	0.00456
1.47195	0.016817	0.018382	0.004588
1.47752	0.0175	0.019412	0.004588
1.4831	0.018429	0.02071	0.004548
1.48868	0.019728	0.022154	0.00452
1.49425	0.021524	0.023621	0.004622
1.49983	0.023884	0.025015	0.004716
1.5054	0.026824	0.026344	0.004803
1.51098	0.030386	0.02763	0.004883
1.51655	0.03449	0.028933	0.005071
1.52213	0.039115	0.030196	0.005394
1.52771	0.04421	0.0314	0.005673
1.53328	0.049729	0.032501	0.005982
1.53886	0.055694	0.033341	0.006193
1.54443	0.062096	0.033902	0.006271
1.55001	0.06891	0.034142	0.006512
1.55558	0.076094	0.034034	0.006805
1.56116	0.083593	0.033679	0.007371
1.56673	0.091422	0.033222	0.008022
1.57231	0.099603	0.032755	0.008813
1.57788	0.108256	0.032365	0.009602
1.58346	0.11756	0.032161	0.010285
1.58904	0.127489	0.032205	0.010679
1.59461	0.13796	0.032544	0.010738
1.60019	0.148684	0.033255	0.010494
1.60576	0.159595	0.03445	0.010203
1.61134	0.170682	0.0362	0.009837
1.61691	0.182045	0.038631	0.009626
1.62249	0.193957	0.041675	0.00956
1.62807	0.206545	0.045301	0.009636
1.63364	0.21977	0.049443	0.009918
1.63922	0.233527	0.054057	0.0101
1.64479	0.247474	0.059174	0.010375
1.65037	0.261406	0.064881	0.01066
1.65594	0.275097	0.071196	0.011108
1.66152	0.288228	0.078014	0.011855
1.66709	0.300817	0.085233	0.012914
1.67267	0.312976	0.092796	0.014119
1.67824	0.325037	0.100674	0.015393
1.68382	0.337352	0.108736	0.016469
1.6894	0.350121	0.116611	0.017444
1.69497	0.363213	0.123907	0.018122
1.70055	0.376239	0.130338	0.018538
1.70612	0.38901	0.135618	0.018664
1.7117	0.401436	0.139935	0.018471
1.71727	0.413502	0.143561	0.017949
1.72285	0.425502	0.146848	0.01724
1.72843	0.437398	0.150069	0.016382
1.734	0.448975	0.153239	0.015419
1.73958	0.459928	0.156273	0.014413
1.74515	0.469669	0.158697	0.013394
1.75073	0.477822	0.160193	0.012734
1.7563	0.484108	0.160526	0.012716
1.76188	0.488091	0.159663	0.013574
1.76745	0.489756	0.158158	0.015524
1.77303	0.489272	0.156603	0.018464
1.77861	0.486955	0.155548	0.022186
1.78418	0.483014	0.155436	0.026332
1.78976	0.477595	0.156173	0.030614
1.79533	0.470935	0.15729	0.034667
1.80091	0.463164	0.158198	0.038129
1.80648	0.454309	0.158155	0.040961
1.81206	0.444688	0.156838	0.043125
1.81763	0.434595	0.154268	0.044782
1.82321	0.424392	0.151007	0.046288
1.82879	0.414324	0.147789	0.047655
1.83436	0.404606	0.145245	0.049146
1.83994	0.395407	0.143807	0.050814
1.84551	0.386523	0.143508	0.052136
1.85109	0.3777	0.144006	0.052951
1.85666	0.368581	0.14487	0.053153
1.86224	0.358912	0.145648	0.052753
1.86782	0.348742	0.145951	0.052018
1.87339	0.338059	0.145801	0.051559
1.87897	0.326855	0.145285	0.051652
1.88454	0.315475	0.144894	0.052539
1.89012	0.304155	0.145207	0.054459
1.89569	0.293162	0.146591	0.057121
1.90127	0.282848	0.149234	0.060229
1.90684	0.273452	0.152916	0.063374
1.91242	0.264966	0.15701	0.065776
1.91799	0.257322	0.160844	0.066988
1.92357	0.250521	0.163764	0.066691
1.92915	0.244649	0.165515	0.065241
1.93472	0.239724	0.166273	0.063016
1.9403	0.235712	0.166458	0.060424
1.94587	0.232343	0.166594	0.05791
1.95145	0.229347	0.166959	0.055248
1.95702	0.226483	0.167645	0.052627
1.9626	0.223567	0.168531	0.050141
1.96818	0.220351	0.169168	0.047956
1.97375	0.216673	0.169263	0.046527
1.97933	0.212332	0.16852	0.04604
1.9849	0.207111	0.166673	0.046577
1.99048	0.201154	0.163959	0.047942
1.99605	0.194774	0.160646	0.049429
2.00163	0.188291	0.157163	0.050927
2.0072	0.181998	0.153966	0.052204
2.01278	0.176127	0.151191	0.053624
2.01836	0.170745	0.148833	0.055667
2.02393	0.165912	0.146786	0.058698
2.02951	0.161548	0.144877	0.063611
2.03508	0.157638	0.142913	0.070407
2.04066	0.154112	0.140651	0.078708
2.04623	0.15097	0.138028	0.087524
2.05181	0.148114	0.134889	0.095402
2.05738	0.145528	0.131349	0.101579
2.06296	0.143238	0.127554	0.105826
2.06853	0.141007	0.123616	0.108865
2.07411	0.138672	0.119648	0.112175
2.07969	0.136036	0.115634	0.116852
2.08526	0.13293	0.111471	0.123217
2.09084	0.129303	0.107068	0.130729
2.09641	0.125205	0.102365	0.138416
2.10199	0.120803	0.097416	0.144961
2.10756	0.116347	0.092375	0.149112
2.11314	0.111976	0.087472	0.150267
2.11871	0.107754	0.082983	0.148586
2.12429	0.10364	0.079114	0.14465
2.12987	0.099667	0.076035	0.139827
2.13544	0.095834	0.073713	0.134991
2.14102	0.092197	0.072103	0.131014
2.14659	0.088872	0.071008	0.128296
2.15217	0.085798	0.070313	0.126427
2.15774	0.082904	0.069932	0.125347
2.16332	0.080106	0.069744	0.125347
2.1689	0.077368	0.069692	0.126733
2.17447	0.074726	0.069668	0.129763
2.18005	0.072156	0.06957	0.1345
2.18562	0.069615	0.06934	0.140761
2.1912	0.067029	0.068938	0.14826
2.19677	0.064332	0.068381	0.156727
2.20235	0.061519	0.067643	0.1664
2.20792	0.058685	0.066628	0.17696
2.2135	0.055913	0.065364	0.188075
2.21908	0.053263	0.063851	0.198757
2.22465	0.050781	0.06217	0.20811
2.23023	0.048573	0.06047	0.216264
2.2358	0.046757	0.058831	0.223583
2.24138	0.045432	0.057374	0.23034
2.24695	0.04467	0.056085	0.237353
2.25253	0.044403	0.055033	0.245353
2.2581	0.044486	0.054205	0.255142
2.26368	0.044745	0.053534	0.267836
2.26926	0.044953	0.05299	0.283896
2.27483	0.045022	0.052441	0.303015
2.28041	0.044938	0.051851	0.323689
2.28598	0.044759	0.051342	0.344131
2.29156	0.044643	0.050915	0.362223
2.29713	0.044707	0.05062	0.37748
2.30271	0.045064	0.050525	0.389793
2.30828	0.045707	0.050542	0.399137
2.31386	0.046492	0.050607	0.405902
2.31944	0.047228	0.050603	0.410699
2.32501	0.04771	0.050475	0.414178
2.33059	0.047779	0.050131	0.417145
2.33616	0.04747	0.04953	0.419282
2.34174	0.04695	0.048697	0.419237
2.34731	0.046476	0.047635	0.416129
2.35289	0.04624	0.046505	0.409548
2.35846	0.04636	0.045477	0.400367
2.36404	0.046808	0.044664	0.390232
2.36962	0.047441	0.044179	0.381216
2.37519	0.048084	0.044047	0.373046
2.38077	0.048543	0.044149	0.365905
2.38634	0.048694	0.044361	0.359833
2.39192	0.048517	0.044554	0.354168
2.39749	0.048036	0.044712	0.348375
2.40307	0.047315	0.044892	0.341328
2.40864	0.04646	0.045171	0.331752
2.41422	0.045534	0.045596	0.318739
2.4198	0.044561	0.046145	0.302746
2.42537	0.04358	0.046779	0.284264
2.43095	0.042635	0.047364	0.264613
2.43652	0.041747	0.047738	0.245007
2.4421	0.040955	0.047753	0.226186
2.44767	0.040244	0.047267	0.209026
2.45325	0.03957	0.046197	0.194928
2.45883	0.038915	0.044642	0.183724
2.4644	0.038214	0.042845	0.174982
2.46998	0.037468	0.041076	0.167694
2.47555	0.036724	0.039586	0.161297
2.48113	0.036067	0.038434	0.155808
2.4867	0.035604	0.037559	0.151682
2.49228	0.035457	0.036877	0.15004
2.49785	0.035701	0.036297	0.151085
2.50343	0.036325	0.035774	0.15483
2.50901	0.037193	0.035352	0.160548
2.51458	0.038094	0.035096	0.167052
2.52016	0.038798	0.035051	0.173864
2.52573	0.039181	0.03532	0.180379
2.53131	0.039226	0.035959	0.186205
2.53688	0.039028	0.036878	0.190866
2.54246	0.038754	0.037885	0.19415
2.54803	0.038563	0.03878	0.196391
2.55361	0.038534	0.03929	0.198319
2.55918	0.038633	0.039297	0.200325
2.56476	0.038746	0.038857	0.202356
2.57034	0.038684	0.038114	0.204237
2.57591	0.038236	0.037256	0.205464
2.58149	0.037331	0.036453	0.205769
2.58706	0.036011	0.035769	0.204823
2.59264	0.034458	0.035221	0.202816
2.59821	0.032888	0.034778	0.199535
2.60379	0.031448	0.034375	0.194569
2.60936	0.030266	0.033954	0.188593
2.61494	0.029332	0.033574	0.182399
2.62052	0.028616	0.033258	0.176656
2.62609	0.028047	0.033048	0.172018
2.63167	0.027597	0.03291	0.167586
2.63724	0.027287	0.032837	0.162781
2.64282	0.027131	0.032819	0.157326
2.64839	0.027167	0.032817	0.151382
2.65397	0.027429	0.0329	0.145835
2.65955	0.027872	0.033084	0.14144
2.66512	0.028453	0.033296	0.138428
2.6707	0.029104	0.033472	0.136793
2.67627	0.029762	0.033484	0.136055
2.68185	0.030451	0.033262	0.136176
2.68742	0.031166	0.032801	0.136658
2.693	0.031963	0.032114	0.137436
2.69857	0.03281	0.031353	0.138081
2.70415	0.033666	0.030661	0.138097
2.70973	0.034454	0.030251	0.137609
2.7153	0.035111	0.030221	0.136434
2.72088	0.035633	0.030576	0.134617
2.72645	0.036059	0.03121	0.131859
2.73203	0.036475	0.031899	0.127636
2.7376	0.036944	0.032467	0.121942
2.74318	0.037469	0.03289	0.115139
2.74875	0.038026	0.03318	0.107665
2.75433	0.038564	0.033545	0.100568
2.7599	0.038965	0.034114	0.094902
2.76548	0.039148	0.034992	0.09166
2.77106	0.039029	0.036185	0.091811
2.77663	0.038624	0.037497	0.096263
2.78221	0.037954	0.038761	0.104902
2.78778	0.037097	0.039792	0.116377
2.79336	0.03616	0.040469	0.128637
2.79893	0.035234	0.040727	0.139657
2.80451	0.034338	0.040634	0.148824
2.81008	0.033486	0.040305	0.156518
2.81566	0.032647	0.039849	0.163471
2.82124	0.031818	0.039339	0.17054
2.82681	0.030997	0.038888	0.178064
2.83239	0.030234	0.03848	0.185813
2.83796	0.029586	0.038205	0.193006
2.84354	0.02909	0.038064	0.199085
2.84911	0.028781	0.038038	0.203466
2.85469	0.028649	0.038156	0.205541
2.86027	0.028714	0.038382	0.205176
2.86584	0.028921	0.038672	0.202981
2.87142	0.029189	0.038988	0.199997
2.87699	0.029456	0.039396	0.197211
2.88257	0.029703	0.039847	0.195201
2.88814	0.029909	0.040318	0.194197
2.89372	0.030145	0.040824	0.194096
2.89929	0.030507	0.041459	0.194929
2.90487	0.031064	0.042208	0.196174
2.91045	0.03186	0.043106	0.197473
2.91602	0.032902	0.044134	0.198547
2.9216	0.034158	0.045284	0.198514
2.92717	0.035547	0.046553	0.197031
2.93275	0.037008	0.047953	0.193946
2.93832	0.038449	0.049452	0.189071
2.9439	0.03984	0.051116	0.183011
2.94948	0.0412	0.053044	0.176529
2.95505	0.042545	0.05527	0.170876
2.96063	0.043901	0.057884	0.166746
2.9662	0.045268	0.060888	0.164598
2.97178	0.046571	0.064088	0.164278
2.97735	0.047671	0.067239	0.16503
2.98293	0.048488	0.070094	0.166453
2.9885	0.048962	0.07249	0.167537
2.99408	0.049093	0.074351	0.168037
2.99966	0.048926	0.075693	0.167989
3.00523	0.048531	0.076549	0.167811
3.01081	0.047962	0.076976	0.168379
3.01638	0.047295	0.077081	0.170753
3.02196	0.046576	0.076817	0.174905
3.02753	0.045887	0.076177	0.18087
3.03311	0.04531	0.075134	0.18761
3.03868	0.044872	0.07372	0.194559
3.04426	0.044522	0.072106	0.200759
3.04983	0.044224	0.070603	0.205967
3.05541	0.043915	0.0695	0.210218
3.06099	0.043527	0.06899	0.21354
3.06656	0.043081	0.069077	0.217073
3.07214	0.042603	0.06956	0.221484
3.07771	0.042149	0.070145	0.226561
3.08329	0.041742	0.070613	0.232243
3.08886	0.041398	0.070891	0.237771
3.09444	0.041082	0.070976	0.242576
3.10001	0.040769	0.071059	0.246507
3.10559	0.040334	0.071256	0.249437
3.11117	0.039654	0.071623	0.251711
3.11674	0.0387	0.072168	0.252622
3.12232	0.037587	0.072818	0.252191
3.12789	0.036512	0.07353	0.250111
3.13347	0.035742	0.074272	0.246044
3.13904	0.035455	0.07509	0.240343
3.14462	0.035624	0.07597	0.233082
3.1502	0.036091	0.076849	0.22418
3.15577	0.036642	0.077715	0.214668
3.16135	0.037056	0.078573	0.205569
3.16692	0.037234	0.079321	0.19768
3.1725	0.037201	0.080021	0.191856
3.17807	0.03702	0.08061	0.189069
3.18365	0.036859	0.08109	0.189144
3.18922	0.036817	0.081452	0.19175
3.1948	0.036915	0.081649	0.19699
3.20038	0.037084	0.081707	0.204282
3.20595	0.037176	0.08153	0.213115
3.21153	0.037019	0.081036	0.223136
3.2171	0.036542	0.080186	0.233693
3.22268	0.035748	0.07895	0.243394
3.22825	0.034768	0.077504	0.251658
3.23383	0.03376	0.076061	0.257752
3.2394	0.032954	0.074804	0.26054
3.24498	0.032434	0.074024	0.260399
3.25055	0.032172	0.073773	0.257511
3.25613	0.032056	0.074104	0.252388
3.26171	0.031907	0.075047	0.24646
3.26728	0.031634	0.07651	0.240187
3.27286	0.031187	0.078412	0.233412
3.27843	0.030631	0.08051	0.225979
3.28401	0.030081	0.082581	0.217724
3.28958	0.029653	0.084424	0.208776
3.29516	0.029429	0.085965	0.199626
3.30073	0.029467	0.087281	0.192005
3.30631	0.029764	0.088527	0.186913
3.31189	0.030255	0.089786	0.185368
3.31746	0.030783	0.091089	0.187595
3.32304	0.031233	0.092256	0.192634
3.32861	0.031532	0.093045	0.199334
3.33419	0.031749	0.093284	0.205983
3.33976	0.031984	0.092921	0.210865
3.34534	0.032316	0.092104	0.213556
3.35092	0.032786	0.091102	0.213872
3.35649	0.033319	0.09016	0.211963
3.36207	0.033785	0.089518	0.208151
3.36764	0.03405	0.089243	0.202757
3.37322	0.034051	0.089175	0.196531
3.37879	0.033798	0.089085	0.189764
3.38437	0.033316	0.08867	0.183536
3.38994	0.032692	0.087717	0.177721
3.39552	0.032039	0.086128	0.172492
3.4011	0.031457	0.083991	0.167614
3.40667	0.031048	0.081594	0.162569
3.41225	0.030813	0.079137	0.157223
3.41782	0.03073	0.076694	0.151772
3.4234	0.030682	0.07428	0.146205
3.42897	0.030587	0.071773	0.14142
3.43455	0.030401	0.069107	0.138043
3.44012	0.030125	0.066351	0.136759
3.4457	0.029769	0.063677	0.137821
3.45128	0.029352	0.061401	0.140895
3.45685	0.028888	0.05972	0.145265
3.46243	0.028445	0.058733	0.149291
3.468	0.028064	0.058437	0.152274
3.47358	0.02782	0.058693	0.153481
3.47915	0.027721	0.059445	0.152714
3.48473	0.027716	0.060572	0.150625
3.49031	0.02774	0.062044	0.148062
3.49588	0.027737	0.063771	0.145686
3.50146	0.027759	0.065536	0.144345
3.50703	0.027874	0.067062	0.14401
3.51261	0.028165	0.068149	0.144664
3.51818	0.028715	0.068651	0.145659
3.52376	0.029602	0.068575	0.146455
3.52933	0.030815	0.068006	0.14646
3.53491	0.032313	0.067081	0.14581
3.54048	0.034024	0.065869	0.144914
3.54606	0.035785	0.064374	0.143685
3.55164	0.037465	0.062654	0.142398
3.55721	0.039021	0.060606	0.140963
3.56279	0.040435	0.058202	0.139127
3.56836	0.04173	0.0555	0.136726
3.57394	0.0429	0.052594	0.133983
3.57951	0.043937	0.049712	0.131284
3.58509	0.044832	0.047134	0.129744
3.59066	0.045625	0.044986	0.129816
3.59624	0.046388	0.043302	0.131864
3.60182	0.047186	0.042113	0.13528
3.60739	0.048054	0.04127	0.138935
3.61297	0.048972	0.040797	0.141671
3.61854	0.049883	0.040719	0.142289
3.62412	0.050824	0.04114	0.141635
3.62969	0.051767	0.042083	0.140472
3.63527	0.052694	0.043509	0.139688
3.64085	0.053565	0.045301	0.139846
3.64642	0.054297	0.04732	0.141048
3.652	0.054846	0.049431	0.142748
3.65757	0.05519	0.051492	0.144122
3.66315	0.055343	0.053465	0.143968
3.66872	0.055295	0.055359	0.141821
3.6743	0.054991	0.057273	0.137615
3.67987	0.054362	0.059083	0.131949
3.68545	0.053338	0.060726	0.125616
3.69102	0.05194	0.061977	0.119419
3.6966	0.050217	0.062689	0.114099
3.70218	0.048252	0.062775	0.109263
3.70775	0.046163	0.062262	0.10482
3.71333	0.044019	0.061333	0.100698
3.7189	0.041908	0.060158	0.097076
3.72448	0.039925	0.058781	0.094438
3.73005	0.038137	0.057195	0.093215
3.73563	0.036582	0.055373	0.093528
3.7412	0.035255	0.053249	0.09546
3.74678	0.034116	0.050926	0.098814
3.75236	0.033127	0.048356	0.103164
3.75793	0.032268	0.045623	0.10813
3.76351	0.031608	0.042827	0.11355
3.76908	0.031166	0.040113	0.119193
3.77466	0.030967	0.03761	0.125299
3.78023	0.030966	0.035453	0.132755
3.78581	0.031116	0.033706	0.142281
3.79139	0.031387	0.03239	0.15434
3.79696	0.031758	0.031587	0.168672
3.80254	0.03222	0.031397	0.183918
3.80811	0.032777	0.031984	0.198496
3.81369	0.03342	0.03335	0.211501
3.81926	0.034141	0.035329	0.222129
3.82484	0.034959	0.037542	0.230599
3.83041	0.035876	0.039634	0.237625
3.83599	0.03691	0.041365	0.244304
3.84157	0.038018	0.042629	0.251757
3.84714	0.039105	0.043511	0.261055
3.85272	0.040031	0.044177	0.272691
3.85829	0.040726	0.044714	0.286745
3.86387	0.041134	0.045184	0.302968
3.86944	0.041223	0.045588	0.321029
3.87502	0.041034	0.045773	0.340675
3.88059	0.040631	0.045598	0.362104
3.88617	0.040086	0.044972	0.385219
3.89174	0.039521	0.043883	0.410094
3.89732	0.038979	0.042517	0.436997
3.9029	0.038468	0.041169	0.465648
3.90847	0.037998	0.040148	0.494463
3.91405	0.037502	0.039619	0.522133
3.91962	0.03692	0.039598	0.547204
3.9252	0.036299	0.039944	0.568922
3.93077	0.035731	0.040482	0.587079
3.93635	0.035281	0.041076	0.601852
3.94192	0.035042	0.041674	0.613404
3.9475	0.035057	0.042187	0.622029
3.95308	0.035334	0.042644	0.627149
3.95865	0.035851	0.043105	0.627327
3.96423	0.036548	0.043544	0.623149
3.9698	0.037259	0.043961	0.615264
3.97538	0.037857	0.04432	0.606566
3.98095	0.03825	0.044532	0.601067
3.98653	0.038385	0.044542	0.602739
3.99211	0.038321	0.044309	0.61357
3.99768	0.038212	0.043889	0.632975
4.00326	0.038181	0.043387	0.659133
4.00883	0.038323	0.042918	0.689293
4.01441	0.038691	0.04262	0.719889
4.01998	0.039214	0.042512	0.74804
4.02556	0.039819	0.042595	0.772026
4.03113	0.040357	0.042784	0.791849
4.03671	0.040688	0.042986	0.811282
4.04229	0.040743	0.043173	0.832842
4.04786	0.040543	0.043439	0.858197
4.05344	0.040182	0.043889	0.884784
4.05901	0.039758	0.044663	0.907461
4.06459	0.039315	0.04583	0.921632
4.07016	0.038924	0.047397	0.924353
4.07574	0.038503	0.04921	0.91689
4.08132	0.037961	0.05112	0.901503
4.08689	0.037255	0.0529	0.881455
4.09247	0.03635	0.054352	0.859607
4.09804	0.035298	0.055404	0.837998
4.10362	0.034234	0.056065	0.817267
4.10919	0.03335	0.056464	0.798032
4.11477	0.032775	0.056703	0.779114
4.12034	0.032602	0.056887	0.76028
4.12592	0.032809	0.05707	0.742323
4.1315	0.033274	0.057324	0.727141
4.13707	0.033879	0.05763	0.716361
4.14265	0.034547	0.057986	0.711035
4.14822	0.035193	0.058347	0.711073
4.1538	0.035825	0.058695	0.714476
4.15937	0.036457	0.058937	0.719646
4.16495	0.037054	0.059086	0.72475
4.17052	0.037606	0.059152	0.730354
4.1761	0.038056	0.059206	0.736195
4.18168	0.03833	0.05929	0.74204
4.18725	0.038397	0.059379	0.747482
4.19283	0.038324	0.059519	0.750742
4.1984	0.038162	0.059729	0.749941
4.20398	0.038016	0.059963	0.74303
4.20955	0.037976	0.060146	0.728792
4.21513	0.038018	0.060282	0.708982
4.2207	0.038106	0.060298	0.685321
4.22628	0.03817	0.06019	0.660424
4.23186	0.03816	0.059916	0.636754
4.23743	0.038138	0.059556	0.614764
4.24301	0.038191	0.059152	0.594578
4.24858	0.03839	0.058751	0.573607
4.25416	0.038757	0.058424	0.551208
4.25973	0.039249	0.05825	0.527436
4.26531	0.039725	0.058312	0.502677
4.27088	0.040034	0.058635	0.479003
4.27646	0.040083	0.059124	0.458011
4.28203	0.039828	0.059695	0.440524
4.28761	0.03934	0.060141	0.427543
4.29319	0.038772	0.060261	0.418162
4.29876	0.038244	0.059972	0.412084
4.30434	0.037829	0.05926	0.409144
4.30991	0.03757	0.058346	0.408171
4.31549	0.037398	0.057479	0.408371
4.32106	0.037219	0.056877	0.409376
4.32664	0.036969	0.056675	0.411562
4.33221	0.036683	0.056844	0.415943
4.33779	0.036419	0.057244	0.423911
4.34337	0.036301	0.05774	0.43593
4.34894	0.036413	0.058132	0.45134
4.35452	0.036768	0.058312	0.46944
4.36009	0.03732	0.05822	0.489639
4.36567	0.037982	0.05795	0.511538
4.37124	0.038671	0.057633	0.535118
4.37682	0.03933	0.057456	0.558257
4.38239	0.039934	0.05755	0.578349
4.38797	0.040459	0.057828	0.5935
4.39355	0.040831	0.058132	0.601819
4.39912	0.04103	0.05824	0.604423
4.4047	0.041053	0.058016	0.603004
4.41027	0.040921	0.057388	0.599756
4.41585	0.040719	0.056464	0.596049
4.42142	0.040505	0.055239	0.593178
4.427	0.040337	0.053742	0.592062
4.43257	0.040218	0.052071	0.591706
4.43815	0.040156	0.050314	0.58989
4.44373	0.040117	0.048576	0.583728
4.4493	0.040033	0.047028	0.571004
4.45488	0.039876	0.04583	0.553572
4.46045	0.039633	0.045046	0.53514
4.46603	0.039344	0.044814	0.520197
4.4716	0.039122	0.045125	0.513213
4.47718	0.039072	0.045895	0.514091
4.48276	0.039234	0.046963	0.520737
4.48833	0.039561	0.048159	0.52921
4.49391	0.039896	0.049261	0.535921
4.49948	0.0401	0.050268	0.538334
4.50506	0.040089	0.051237	0.534937
4.51063	0.03993	0.052223	0.526322
4.51621	0.03976	0.053335	0.51419
4.52178	0.039747	0.054564	0.500969
4.52736	0.040013	0.055765	0.488752
4.53294	0.040563	0.056689	0.478009
4.53851	0.041305	0.057134	0.468083
4.54409	0.042109	0.056843	0.45765
4.54966	0.042875	0.05574	0.445594
4.55524	0.043498	0.053991	0.431652
4.56081	0.04396	0.051892	0.416686
4.56639	0.044266	0.049744	0.4012
4.57196	0.044463	0.047802	0.385724
4.57754	0.044582	0.046232	0.370731
4.58312	0.044669	0.045062	0.356608
4.58869	0.04472	0.044303	0.343616
4.59427	0.044782	0.04389	0.332184
4.59984	0.044864	0.043748	0.322069
4.60542	0.04502	0.043842	0.312745
4.61099	0.045263	0.044079	0.303111
4.61657	0.045579	0.044473	0.291927
4.62214	0.04591	0.045128	0.278484
4.62772	0.046155	0.046071	0.262262
4.6333	0.046325	0.047309	0.243941
4.63887	0.04644	0.048705	0.22453
4.64445	0.046607	0.050132	0.205331
4.65002	0.046888	0.051474	0.187442
4.6556	0.047314	0.052646	0.171508
4.66117	0.047821	0.053601	0.157593
4.66675	0.048372	0.054321	0.14577
4.67232	0.048913	0.054778	0.135916
4.6779	0.049468	0.055021	0.127803
4.68348	0.050042	0.055061	0.120984
4.68905	0.050663	0.055065	0.11531
4.69463	0.051367	0.0551	0.110629
4.7002	0.052137	0.055157	0.107075
4.70578	0.053012	0.05525	0.105335
4.71135	0.053942	0.055276	0.105357
4.71693	0.054839	0.055189	0.107164
4.7225	0.055629	0.054938	0.110403
4.72808	0.056275	0.054548	0.114541
4.73366	0.0568	0.054009	0.119141
4.73923	0.057236	0.053468	0.12357
4.74481	0.057569	0.052957	0.126953
4.75038	0.057721	0.052541	0.128787
4.75596	0.057611	0.05222	0.128878
4.76153	0.057192	0.051934	0.127334
4.76711	0.056493	0.051548	0.124736
4.77269	0.055542	0.050927	0.12173
4.77826	0.054402	0.050034	0.118898
4.78384	0.053097	0.048941	0.116288
4.78941	0.051675	0.047792	0.11383
4.79499	0.050249	0.046848	0.111099
4.80056	0.048929	0.046325	0.108059
4.80614	0.047832	0.046295	0.104965
4.81171	0.046979	0.046733	0.101922
4.81729	0.046325	0.047502	0.099506
4.82287	0.04579	0.048527	0.097887
4.82844	0.045266	0.049709	0.096902
4.83402	0.044669	0.050985	0.096429
4.83959	0.043983	0.052418	0.096009
4.84517	0.043229	0.054039	0.095284
4.85074	0.042519	0.055911	0.094281
4.85632	0.041975	0.05806	0.092813
4.86189	0.041716	0.060341	0.091216
4.86747	0.041771	0.062571	0.089656
4.87305	0.042079	0.06445	0.088309
4.87862	0.042557	0.065771	0.087325
4.8842	0.043078	0.066594	0.086606
4.88977	0.043594	0.067025	0.086031
4.89535	0.044113	0.067273	0.085112
4.90092	0.044649	0.067404	0.08384
4.9065	0.04522	0.067371	0.082338
4.91207	0.045794	0.067072	0.080662
4.91765	0.046346	0.066305	0.079586
4.92323	0.046874	0.064972	0.079984
4.9288	0.047384	0.063083	0.082383
4.93438	0.047894	0.060732	0.087335
4.93995	0.048415	0.058179	0.094459
4.94553	0.048921	0.055643	0.103143
4.9511	0.049403	0.053434	0.112497
4.95668	0.049758	0.051666	0.121022
4.96225	0.049909	0.050264	0.128007
4.96783	0.049803	0.049115	0.133063
4.9734	0.049455	0.047997	0.136192
4.97898	0.048917	0.046853	0.137971
4.98456	0.048297	0.045639	0.139017
4.99013	0.047672	0.044477	0.14006
4.99571	0.047018	0.04356	0.141656
5.00128	0.046282	0.043014	0.143383
5.00686	0.045404	0.042937	0.144916
5.01243	0.044349	0.043254	0.14562
5.01801	0.043168	0.043762	0.145071
5.02358	0.041988	0.044374	0.143266
5.02916	0.040908	0.044901	0.140639
5.03474	0.040058	0.045317	0.138008
5.04031	0.039577	0.045623	0.135835
5.04589	0.039471	0.045906	0.134498
5.05146	0.039688	0.046185	0.134449
5.05704	0.040138	0.046403	0.135311
5.06261	0.040674	0.046617	0.136632
5.06819	0.041254	0.04681	0.137533
5.07376	0.041916	0.046993	0.136886
5.07934	0.04272	0.047394	0.134531
5.08492	0.043659	0.048082	0.130248
5.09049	0.044665	0.04915	0.124253
5.09607	0.045528	0.050545	0.117405
5.10164	0.046054	0.052051	0.11053
5.10722	0.046101	0.053388	0.104111
5.11279	0.045609	0.054277	0.098598
5.11837	0.044581	0.054587	0.094136
5.12394	0.043155	0.054284	0.090656
5.12952	0.041533	0.053508	0.087569
5.1351	0.039955	0.052497	0.084711
5.14067	0.038657	0.05147	0.081849
5.14625	0.03769	0.050606	0.079118
5.15182	0.036975	0.050054	0.07688
5.1574	0.036365	0.049734	0.075211
5.16297	0.035827	0.049639	0.073961
5.16855	0.035443	0.049621	0.073015
5.17413	0.035402	0.049684	0.071927
5.1797	0.035906	0.0499	0.07037
5.18528	0.037032	0.050418	0.068297
5.19085	0.038719	0.051442	0.065911
5.19643	0.040791	0.053099	0.063622
5.202	0.042918	0.055348	0.061688
5.20758	0.044806	0.058055	0.060718
5.21316	0.046232	0.060924	0.060687
5.21873	0.047033	0.063656	0.061774
5.22431	0.047202	0.065956	0.063898
5.22988	0.046882	0.067601	0.066963
5.23546	0.046259	0.068439	0.071032
5.24103	0.045525	0.068379	0.076059
5.24661	0.044763	0.067496	0.081906
5.25218	0.04395	0.065935	0.088351
5.25776	0.042981	0.063937	0.094958
5.26333	0.041817	0.061895	0.101618
5.26891	0.040459	0.0601	0.107989
5.27449	0.038974	0.058703	0.114038
5.28006	0.037576	0.057805	0.119858
5.28564	0.03641	0.057283	0.125028
5.29121	0.035543	0.057036	0.129455
5.29679	0.035051	0.056925	0.132822
5.30236	0.034934	0.056956	0.13518
5.30794	0.035114	0.05715	0.136646
5.31351	0.035529	0.057558	0.137706
5.31909	0.036041	0.058207	0.138935
5.32467	0.036594	0.059142	0.140921
5.33024	0.037158	0.060403	0.143942
5.33582	0.037698	0.061922	0.148463
5.34139	0.038176	0.063473	0.153887
5.34697	0.03856	0.064828	0.159434
5.35254	0.038814	0.065808	0.163554
5.35812	0.038917	0.066319	0.165049
5.36369	0.038909	0.066495	0.163866
5.36927	0.038872	0.066531	0.160799
5.37485	0.038874	0.066638	0.157381
5.38042	0.039023	0.066862	0.155109
5.386	0.039422	0.06703	0.155593
5.39157	0.040065	0.06699	0.158762
5.39715	0.040903	0.066574	0.164235
5.40272	0.041759	0.065726	0.170734
5.4083	0.042493	0.064469	0.176893
5.41387	0.043048	0.062923	0.18151
5.41945	0.043446	0.06127	0.18409
5.42503	0.043735	0.059684	0.185242
5.4306	0.043994	0.058171	0.186506
5.43618	0.044271	0.056705	0.189381
5.44175	0.044527	0.055178	0.194834
5.44733	0.044727	0.053494	0.202556
5.4529	0.044809	0.051655	0.211533
5.45848	0.044712	0.049706	0.220756
5.46406	0.044413	0.047815	0.228919
5.46963	0.043936	0.046096	0.235384
5.47521	0.043281	0.044764	0.240208
5.48078	0.042521	0.04388	0.243818
5.48636	0.041653	0.043395	0.247188
5.49193	0.040657	0.043211	0.250767
5.49751	0.039551	0.043088	0.254872
5.50308	0.038386	0.042865	0.258972
5.50866	0.037223	0.042549	0.262368
5.51424	0.036109	0.042156	0.264652
5.51981	0.035068	0.041795	0.265334
5.52539	0.034109	0.041561	0.264623
5.53096	0.033225	0.041395	0.262391
5.53654	0.032411	0.041319	0.258252
5.54211	0.031681	0.041328	0.252192
5.54769	0.031081	0.041453	0.245041
5.55326	0.030685	0.041692	0.237222
5.55884	0.030525	0.042071	0.229884
5.56442	0.03059	0.042608	0.223582
5.56999	0.030891	0.043233	0.218415
5.57557	0.031397	0.043921	0.214864
5.58114	0.032127	0.044543	0.213216
5.58672	0.033135	0.045009	0.213598
5.59229	0.034447	0.045318	0.215802
5.59787	0.036111	0.045495	0.219104
5.60344	0.038047	0.045622	0.222446
5.60902	0.040106	0.045836	0.225015
5.61459	0.042128	0.046222	0.226433
5.62017	0.043904	0.04686	0.226685
5.62575	0.0453	0.047805	0.225562
5.63132	0.046289	0.049011	0.223159
5.6369	0.046924	0.050343	0.219499
5.64247	0.047375	0.051684	0.214477
5.64805	0.047773	0.052956	0.208489
5.65362	0.048226	0.054139	0.201747
5.6592	0.048727	0.055333	0.194554
5.66477	0.049148	0.056608	0.187069
5.67035	0.049368	0.058007	0.179495
5.67593	0.049231	0.059523	0.172106
5.6815	0.048693	0.061078	0.165354
5.68708	0.047795	0.06269	0.159727
5.69265	0.046611	0.064342	0.155394
5.69823	0.045292	0.066052	0.152109
5.7038	0.043945	0.06781	0.149565
5.70938	0.042663	0.069617	0.147918
5.71496	0.041522	0.071572	0.147046
5.72053	0.040565	0.073731	0.147273
5.72611	0.039812	0.076143	0.148687
5.73168	0.039218	0.078745	0.150381
5.73726	0.03875	0.08145	0.151465
5.74283	0.038392	0.084174	0.150826
5.74841	0.038103	0.086902	0.147801
5.75398	0.03795	0.089716	0.142597
5.75956	0.037993	0.092762	0.135807
5.76514	0.038281	0.096144	0.128315
5.77071	0.03883	0.099911	0.12112
5.77629	0.039604	0.10401	0.114611
5.78186	0.040537	0.10842	0.109239
5.78744	0.041536	0.113164	0.104838
5.79301	0.042512	0.118328	0.100792
5.79859	0.043346	0.123934	0.096569
5.80417	0.043947	0.129856	0.091768
5.80974	0.044272	0.135885	0.086738
5.81532	0.044284	0.141816	0.08218
5.82089	0.044033	0.147533	0.079552
5.82647	0.043621	0.153043	0.079614
5.83204	0.043113	0.158539	0.08259
5.83762	0.04258	0.164331	0.087935
5.84319	0.042061	0.170595	0.094635
5.84877	0.041598	0.177457	0.101426
5.85435	0.041209	0.184894	0.107456
5.85992	0.040884	0.192673	0.11189
5.8655	0.040561	0.200504	0.114132
5.87107	0.040162	0.207892	0.114444
5.87665	0.039672	0.214565	0.113065
5.88222	0.039097	0.220543	0.110638
5.8878	0.038487	0.226149	0.108036
5.89337	0.037927	0.231771	0.105847
5.89895	0.037467	0.237761	0.103913
5.90452	0.037186	0.244378	0.102001
5.9101	0.037173	0.251776	0.100135
5.91568	0.037421	0.259644	0.098473
5.92125	0.037914	0.267709	0.097592
5.92683	0.038499	0.275755	0.098019
5.9324	0.039028	0.283542	0.099891
5.93798	0.039399	0.290993	0.103054
5.94355	0.039581	0.297933	0.106789
5.94913	0.039649	0.304086	0.110403
5.9547	0.039696	0.309406	0.113781
5.96028	0.039792	0.313709	0.116787
5.96586	0.039937	0.31701	0.119783
5.97143	0.040106	0.319457	0.122882
5.97701	0.040265	0.321173	0.126085
5.98258	0.040368	0.322219	0.12934
5.98816	0.040323	0.322409	0.131715
5.99373	0.040103	0.321609	0.132803
5.99931	0.039661	0.319463	0.132143
6.00488	0.039082	0.315685	0.129828
6.01046	0.038452	0.310354	0.126688
6.01604	0.037858	0.303774	0.123394
6.02161	0.037394	0.296655	0.12091
6.02719	0.03707	0.289956	0.119752
6.03276	0.036833	0.284108	0.119436
6.03834	0.036641	0.279456	0.119418
6.04391	0.036468	0.275771	0.11888
6.04949	0.036276	0.272327	0.117307
6.05506	0.036049	0.268514	0.114781
6.06064	0.035768	0.263871	0.111352
6.06622	0.035422	0.258061	0.107671
6.07179	0.035048	0.251311	0.104256
6.07737	0.03468	0.244059	0.101375
6.08294	0.034332	0.236621	0.099056
6.08852	0.034042	0.229409	0.096818
6.09409	0.033804	0.222482	0.094083
6.09967	0.033595	0.215639	0.090277
6.10525	0.033429	0.208747	0.08498
6.11082	0.033349	0.201675	0.078757
6.1164	0.033377	0.194329	0.072332
6.12197	0.033568	0.18679	0.06636
6.12755	0.033952	0.179447	0.06115
6.13312	0.034503	0.172671	0.056657
6.1387	0.035174	0.166801	0.052922
6.14427	0.035868	0.162172	0.049895
6.14985	0.036495	0.158773	0.047319
6.15543	0.037043	0.156558	0.045458
6.161	0.037531	0.155473	0.04424
6.16658	0.038012	0.155155	0.043865
6.17215	0.038576	0.155488	0.045055
6.17773	0.039238	0.156258	0.048507
6.1833	0.039968	0.157097	0.054448
6.18888	0.040691	0.157871	0.062388
6.19445	0.041314	0.158455	0.07118
6.20003	0.041733	0.158874	0.079363
6.20561	0.041914	0.159185	0.086069
6.21118	0.041827	0.159406	0.091365
6.21676	0.041522	0.159423	0.096298
6.22233	0.041113	0.159121	0.102007
6.22791	0.040656	0.158475	0.109607
6.23348	0.040178	0.157441	0.119185
6.23906	0.039672	0.156061	0.129912
6.24463	0.039099	0.154401	0.14023
6.25021	0.038427	0.152222	0.147862
6.25579	0.037721	0.14944	0.151442
6.26136	0.037034	0.14614	0.150847
6.26694	0.036439	0.142351	0.147108
6.27251	0.035974	0.138437	0.142543
6.27809	0.035606	0.134644	0.138981
6.28366	0.035245	0.131192	0.137579
6.28924	0.034842	0.128086	0.138326
6.29481	0.034374	0.125163	0.139899
6.30039	0.033886	0.122212	0.140934
6.30597	0.033533	0.119019	0.140608
6.31154	0.033453	0.115623	0.138159
6.31712	0.033732	0.112128	0.134117
6.32269	0.034351	0.10866	0.129396
6.32827	0.035151	0.105501	0.125235
6.33384	0.035899	0.10275	0.122491
6.33942	0.03641	0.10027	0.121123
6.34499	0.03663	0.097971	0.120847
6.35057	0.036667	0.095501	0.120827
6.35615	0.036743	0.09268	0.120964
6.36172	0.037101	0.089401	0.121403
6.3673	0.037881	0.085719	0.122423
6.37287	0.039083	0.081922	0.124263
6.37845	0.040583	0.078257	0.126529
6.38402	0.042139	0.074901	0.128195
6.3896	0.043536	0.071918	0.128987
6.39518	0.044604	0.069313	0.128744
6.40075	0.045312	0.06707	0.12799
6.40633	0.045763	0.065206	0.127664
6.4119	0.046087	0.063749	0.12861
6.41748	0.046358	0.062809	0.131638
6.42305	0.046554	0.062506	0.137052
6.42863	0.046565	0.062959	0.144899
6.4342	0.046289	0.064253	0.154887
6.43978	0.045675	0.06635	0.166386
6.44536	0.044781	0.069209	0.178357
6.45093	0.043752	0.072585	0.18935
6.45651	0.042738	0.076324	0.198997
6.46208	0.04183	0.080256	0.207523
6.46766	0.041125	0.084185	0.215804
6.47323	0.040701	0.087949	0.224406
6.47881	0.040547	0.091487	0.233367
6.48438	0.040665	0.094804	0.2419
6.48996	0.041059	0.098061	0.248958
6.49554	0.04175	0.101461	0.253852
6.50111	0.042766	0.105174	0.25638
6.50669	0.044071	0.109277	0.256468
6.51226	0.045544	0.113652	0.254424
6.51784	0.047077	0.117993	0.250705
6.52341	0.048591	0.121961	0.246029
6.52899	0.050004	0.12532	0.241963
6.53456	0.051342	0.127903	0.239208
6.54014	0.052658	0.12986	0.238035
6.54572	0.053944	0.131419	0.237567
6.55129	0.055212	0.132842	0.236515
6.55687	0.056443	0.13428	0.233768
6.56244	0.057541	0.135746	0.22934
6.56802	0.058431	0.137179	0.223909
6.57359	0.05901	0.138432	0.218499
6.57917	0.05919	0.139269	0.213579
6.58474	0.058986	0.139531	0.20903
6.59032	0.058488	0.139033	0.203976
6.59589	0.057837	0.137883	0.197257
6.60147	0.057122	0.136335	0.18827
6.60705	0.056393	0.134707	0.176778
6.61262	0.055672	0.133534	0.163329
6.6182	0.054964	0.132976	0.148687
6.62377	0.054275	0.13298	0.133843
6.62935	0.053618	0.133421	0.120354
6.63492	0.053043	0.134115	0.109491
6.6405	0.052661	0.134926	0.101972
6.64607	0.052613	0.135774	0.09784
6.65165	0.053071	0.13668	0.096038
6.65723	0.054171	0.137723	0.095026
6.6628	0.055892	0.139033	0.093612
6.66838	0.058126	0.140886	0.09115
6.67395	0.060661	0.143508	0.087935
6.67953	0.063255	0.146894	0.084779
6.6851	0.065783	0.150796	0.082187
6.69068	0.068152	0.154594	0.080481
6.69625	0.070378	0.157653	0.079873
6.70183	0.072556	0.159622	0.080139
6.70741	0.074732	0.160369	0.080721
6.71298	0.076944	0.160065	0.081121
6.71856	0.079184	0.159135	0.080521
6.72413	0.08139	0.157892	0.07827
6.72971	0.083475	0.156554	0.074644
6.73528	0.085365	0.155312	0.070719
6.74086	0.087109	0.154015	0.067574
6.74643	0.088801	0.152521	0.066079
6.75201	0.090568	0.150594	0.066462
6.75759	0.09251	0.14811	0.067406
6.76316	0.094631	0.145268	0.067968
6.76874	0.096853	0.142339	0.067481
6.77431	0.099089	0.139765	0.065284
6.77989	0.101208	0.137875	0.061629
6.78546	0.103139	0.136833	0.057136
6.79104	0.104833	0.136607	0.052109
6.79662	0.106235	0.137062	0.047256
6.80219	0.107349	0.138109	0.04299
6.80777	0.108289	0.139671	0.039404
6.81334	0.10919	0.141652	0.036142
6.81892	0.110158	0.144161	0.032947
6.82449	0.111259	0.147194	0.029693
6.83007	0.112406	0.150735	0.026476
6.83564	0.113551	0.154715	0.023999
6.84122	0.114599	0.158934	0.022452
6.8468	0.115503	0.163185	0.021739
6.85237	0.116264	0.167316	0.021858
6.85795	0.116928	0.171159	0.022671
6.86352	0.117549	0.174697	0.023913
6.8691	0.118167	0.177999	0.025596
6.87467	0.118826	0.181036	0.027698
6.88025	0.119603	0.183895	0.030139
6.88582	0.120535	0.186554	0.032614
6.8914	0.121671	0.188955	0.034958
6.89698	0.123005	0.191031	0.037055
6.90255	0.124502	0.192913	0.038549
6.90813	0.126225	0.194869	0.039319
6.9137	0.12825	0.197292	0.039549
6.91928	0.130802	0.200383	0.039438
6.92485	0.134202	0.204196	0.039245
6.93043	0.138685	0.208517	0.039029
6.936	0.144492	0.213207	0.038796
6.94158	0.151609	0.218136	0.038174
6.94716	0.159947	0.223248	0.036989
6.95273	0.169298	0.228651	0.035146
6.95831	0.179281	0.234403	0.032603
6.96388	0.189537	0.240584	0.029644
6.96946	0.199796	0.247418	0.026355
6.97503	0.210075	0.255393	0.022743
6.98061	0.220617	0.265	0.019191
6.98618	0.231776	0.27635	0.015881
6.99176	0.243867	0.289109	0.012853
6.99734	0.257076	0.30287	0.010465
7.00291	0.271218	0.317132	0.008832
7.00849	0.28608	0.331908	0.008032
7.01406	0.301281	0.347394	0.007971
7.01964	0.316836	0.364183	0.008679
7.02521	0.332734	0.383064	0.010215
7.03079	0.349244	0.404549	0.012071
7.03636	0.366697	0.429184	0.013981
7.04194	0.385245	0.457196	0.015475
7.04752	0.404884	0.48808	0.01669
7.05309	0.425326	0.520876	0.017844
7.05867	0.446034	0.554369	0.019296
7.06424	0.466717	0.587559	0.021157
7.06982	0.487382	0.620194	0.023501
7.07539	0.508151	0.652463	0.026226
7.08097	0.529765	0.684459	0.029085
7.08655	0.552389	0.716198	0.032028
7.09212	0.576168	0.74753	0.035227
7.0977	0.600798	0.777992	0.039018
7.10327	0.625882	0.807209	0.043181
7.10885	0.651061	0.834667	0.048053
7.11442	0.676056	0.8597	0.053384
7.12	0.700553	0.881799	0.05903
7.12557	0.724548	0.900754	0.064663
7.13115	0.74808	0.916537	0.069857
7.13673	0.771304	0.929523	0.074022
7.1423	0.794317	0.94009	0.076897
7.14788	0.816773	0.9486	0.07843
7.15345	0.838215	0.954973	0.07858
7.15903	0.858018	0.959195	0.07754
7.1646	0.876131	0.960832	0.075664
7.17018	0.892626	0.959313	0.073089
7.17575	0.907666	0.954463	0.06993
7.18133	0.921084	0.946213	0.066289
7.18691	0.931747	0.935028	0.062114
7.19248	0.938648	0.921191	0.057684
7.19806	0.941152	0.905145	0.053168
7.20363	0.93905	0.887031	0.048633
7.20921	0.933268	0.866952	0.044176
7.21478	0.925128	0.844654	0.040256
7.22036	0.915913	0.819746	0.037199
7.22593	0.906427	0.791766	0.035341
7.23151	0.896656	0.760576	0.034877
7.23709	0.88582	0.726561	0.035721
7.24266	0.872802	0.690743	0.037228
7.24824	0.856881	0.654366	0.038742
7.25381	0.837676	0.61822	0.039804
7.25939	0.815654	0.582888	0.040242
7.26496	0.792411	0.548377	0.040319
7.27054	0.769556	0.514727	0.040187
7.27611	0.748837	0.481936	0.039968
7.28169	0.731021	0.450304	0.039753
7.28726	0.715533	0.420147	0.039614
7.29284	0.701133	0.391794	0.039264
7.29842	0.685939	0.365779	0.038746
7.30399	0.668542	0.342223	0.037704
7.30957	0.648639	0.321246	0.036011
7.31514	0.626586	0.302947	0.033762
7.32072	0.603559	0.287062	0.031236
7.32629	0.58049	0.273382	0.028709
7.33187	0.558042	0.261536	0.026393
7.33744	0.5366	0.250673	0.024418
7.34302	0.515908	0.24028	0.022632
7.3486	0.495516	0.22976	0.020973
7.35417	0.474647	0.218684	0.019494
7.35975	0.452873	0.206936	0.018314
7.36532	0.430089	0.194576	0.017335
7.3709	0.406473	0.181773	0.016676
7.37647	0.382535	0.168828	0.016186
7.38205	0.359063	0.156331	0.015856
7.38762	0.336611	0.144799	0.015501
7.3932	0.315537	0.1344	0.015183
7.39878	0.2958	0.12513	0.014846
7.40435	0.277162	0.116686	0.014507
7.40993	0.259464	0.108672	0.014151
7.4155	0.242487	0.100911	0.013706
7.42108	0.226188	0.093247	0.013085
7.42665	0.210563	0.085946	0.01237
7.43223	0.195584	0.079234	0.01165
7.43781	0.181196	0.073359	0.010767
7.44338	0.167408	0.068445	0.009993
7.44896	0.154257	0.064493	0.009282
7.45453	0.141872	0.061392	0.008406
7.46011	0.130286	0.058869	0.007517
7.46568	0.11944	0.056638	0.006698
7.47126	0.109305	0.054532	0.00592
7.47683	0.099818	0.05241	0.005273
7.48241	0.090979	0.050209	0.004626
7.48799	0.08283	0.047956	0.003923
7.49356	0.075418	0.045734	0.003369
7.49914	0.06883	0.043557	0.003105
7.50471	0.063103	0.041326	0.003145
7.51029	0.058248	0.03899	0.003487
7.51586	0.054241	0.036445	0.00403
7.52144	0.050957	0.033719	0.004576
7.52701	0.048258	0.030909	0.004984
7.53259	0.045936	0.02811	0.005406
7.53817	0.043821	0.025437	0.00578
7.54374	0.041766	0.022972	0.006004
7.54932	0.039698	0.020787	0.006136
7.55489	0.037532	0.018949	0.006136
7.56047	0.035234	0.01753	0.006136
7.56604	0.032813	0.016474	0.006136
7.57162	0.030324	0.015727	0.006096
7.57719	0.027855	0.015198	0.006097
7.58277	0.02551	0.01476	0.006087
7.58835	0.023318	0.014341	0.006307
7.59392	0.021343	0.013941	0.006913
7.5995	0.0196	0.013523	0.007854
7.60507	0.018048	0.013167	0.009171
7.61065	0.016723	0.012895	0.010511
7.61622	0.015606	0.012691	0.011568
7.6218	0.014667	0.012571	0.012313
7.62737	0.013878	0.012513	0.012749
7.63295	0.013213	0.012484	0.01288
7.63853	0.012598	0.012419	0.012864
7.6441	0.011972	0.012365	0.012754
7.64968	0.011291	0.012293	0.012717
7.65525	0.010556	0.012165	0.012498
7.66083	0.009797	0.012035	0.012234
7.6664	0.009077	0.011915	0.011682
7.67198	0.008425	0.01186	0.010714
7.67755	0.00785	0.011894	0.009558
7.68313	0.007338	0.011982	0.008287
7.68871	0.006849	0.012097	0.00714
7.69428	0.006371	0.012209	0.006487
7.69986	0.005916	0.01225	0.006443
7.70543	0.005492	0.012179	0.006867
7.71101	0.005105	0.01199	0.007598
7.71658	0.004787	0.01171	0.008364
7.72216	0.004517	0.011333	0.009107
7.72774	0.004294	0.010897	0.009443
7.73331	0.004096	0.010493	0.009619
7.73889	0.003898	0.010135	0.009519
7.74446	0.003675	0.009868	0.009303
7.75004	0.003424	0.009685	0.009088
7.75561	0.003158	0.00956	0.008757
7.76119	0.002883	0.009463	0.008326
7.76676	0.002624	0.009355	0.007906
7.77234	0.002389	0.009193	0.007345
7.77792	0.002192	0.008987	0.006634
7.78349	0.00204	0.00878	0.005775
7.78907	0.001931	0.008579	0.004912
7.79464	0.001836	0.008402	0.004076
7.80022	0.001756	0.008278	0.003226
7.80579	0.001672	0.008151	0.002675
7.81137	0.001586	0.008003	0.002284
7.81694	0.001506	0.007841	0.002068
7.82252	0.001456	0.007651	0.001853
7.8281	0.00143	0.007419	0.001637
7.83367	0.001418	0.007159	0.001421
7.83925	0.001428	0.006896	0.001206
7.84482	0.001436	0.006637	0.00099
7.8504	0.001433	0.006401	0.000775
7.85597	0.001416	0.006193	0.000649
7.86155	0.001381	0.005973	0.000499
7.86712	0.001351	0.005757	0.000328
7.8727	0.001346	0.005521	0.000199
7.87828	0.001369	0.005271	0.000199
7.88385	0.001423	0.005064	0.000199
7.88943	0.001504	0.004891	0.000199
	0.001591	0.004746	0.000199

## Sheet: Figure 2M
ALIX-CD63	ALIX-CD81	TSG101-CD63	TSG101-CD81	LC3B-CD63	LC3B-CD81
54.97	49.37	56.26	57.55	4.51	12.32
53.52	48.43	38.36	52.24	12.53	2.57
56.45	50.22	52.73	48.77	4.08	12.67
58.17	47.28	46.26	45.45	0.59	1.1
52.01	47.34	49.21	51.64	3.57	12.56
50.49	47.28	49.88	41.67	0.59	7.33
50	47.73	49.74	54.39	3.23	4.26
55.56	46.43	41.1	46.25	0.7	6.08
47.48	45.56	50.37	52.47		3.93
45.79	46.01	44.62	49.46		5.53
54.26	49.1	43.89	56.07		3.99
47.36	49.25	51.99	56.42		4.25
52.13	50.21	43.89	53.21
49.24	46.6	65.66	56.42
	45.26	59.5	54
			49.33
			45.05
			49.05
			41.28
			51.4
			44.48
			45.79
			40.35
			47.79
			51.22
			47.39

## Sheet: Figure 2S
sEV	LC3B+/-	LC3B -	LC3B +
29.375	40.258	40.258	76.145
54.381	38.2	38.2	59.995
70.914	33.054	33.054	50.796
36.531	67.962	67.962	59.441
61.514	85.962	85.962	106.681
61.013	48.759	48.759	104.333
53.681	43.44	43.44	47.521
50.74	39.286	39.286	58.482
54.511	33.435	33.435	66.357
65.295	53.056	53.056	90.989
52.277	43.2	43.2	72.912
49.204	54.329	54.329	55.554
47.668	52.315	52.315	61.393
62.787	48.4	48.4	59.125
108.199	71.14	71.14	52.091
53.85	37.918	37.918	52.328
63.64	38.504	38.504	54.043
53.762	44.803	44.803	52.2
42.669	44.065	44.065	66.522
62.016	46.438	46.438	49.823
41.885	48.256	48.256	38.133
44.054	43.918	43.918	40.108
77.075	47.794	47.794	39.374
60.946	38.41	38.41	51.555
59.092	59.678	59.678	47.373
67.257	33.603	33.603	48.936
64.74	71.022	71.022	50.016
39.863	45.715	45.715	70.944
61.634	55.249	55.249	59.216
50.317	65.997	65.997	57.142
57.129	50.998	50.998	56.233
88.19	64.821	64.821	62.877
99.272	43.285	43.285	42.818
86.926	59.545	59.545	52.912
62.785	68.973	68.973	44.304
69.182	45.846	45.846	38.999
57.04	45.596	45.596	45.06
77.051	72.973	72.973	60.919
49.467	71.254	71.254	66.125
58.392	48.823	48.823	45.847
46.319	50.813	50.813	41.323
58.774	53.002	53.002	40.637
67.881	48.823	48.823	53.545
75.144	87.611	87.611	72.282
46.964	56.911	56.911	42.326
38.674	52.895	52.895	44.758
49.429	65.361	65.361	86.758
69.837	42.436	42.436	57.405
41.988	72.422	72.422	52.994
49.626	58.917	58.917	82.536
49.965	51.495	51.495	79.057
60.407	66.454	66.454	50.173
54.251	80.672	80.672	47.952
35.207	47.152	47.152	65.1
62.597	52.921	52.921	54.784
55.113	48.57	48.57	46.207
46.734	58.052	58.052	31.422
59.853	47.964	47.964	70.692
42.618	41.909	41.909	55.982
53.535	31.237	31.237	38.079
110.819	60.8	60.8	52.512
81.582	35.004	35.004	58.531
56.716	40.728	40.728	82.76
86.192	58.919	58.919	47.075
59.303	56.579	56.579	54.696
61.14	50.238	50.238	65.696
53.986	39.937	39.937	66.69
69.078	60.226	60.226	62.326
70.915	44.344	44.344	88.688
54.777	65.382	65.382	99.879
52.137	47.789	47.789	77.319
56.24	43.368	43.368	79.364
50.352	40.16	40.16	59.378
52.19	46.94	46.94	81.389
52.039	43.664	43.664	74.282
54.646	33.052	33.052	72.157
55.602	41.111	41.111	68.916
40.259	28.875	28.875	63.234
60.243	44.717	44.717	62.815
61.027	38.075	38.075
69.096	56.869	56.869
40.9	47.547	47.547
54.387	43.149	43.149
56.312	55.882	55.882
54.279	38.857	38.857
71.793	44.12	44.12
73.558	53.006	53.006
58.176	49.893	49.893
52.868	54.449	54.449
43.573	45.765	45.765
53.314	60.409	60.409
49.634	36.725	36.725
54.046	52.386	52.386
51.524	53.332	53.332
45.32	38.66	38.66
46.781	52.765	52.765
48.706	46.264	46.264
35.346	43.818	43.818
46.493	36.488	36.488
41.842	34.401	34.401
49.254	76.145
66.881	59.995
44.826	50.796
40.428	59.441
39.927	106.681
47.138	104.333
65.271	47.521
58.914	58.482
38.451	66.357
40.003	90.989
55.216	72.912
61.27	55.554
	61.393
	59.125
	52.091
	52.328
	54.043
	52.2
	66.522
	49.823
	38.133
	40.108
	39.374
	51.555
	47.373
	48.936
	50.016
	70.944
	59.216
	57.142
	56.233
	62.877
	42.818
	52.912
	44.304
	38.999
	45.06
	60.919
	66.125
	45.847
	41.323
	40.637
	53.545
	72.282
	42.326
	44.758
	86.758
	57.405
	52.994
	82.536
	79.057
	50.173
	47.952
	65.1
	54.784
	46.207
	31.422
	70.692
	55.982
	38.079
	52.512
	58.531
	82.76
	47.075
	54.696
	65.696
	66.69
	62.326
	88.688
	99.879
	77.319
	79.364
	59.378
	81.389
	74.282
	72.157
	68.916
	63.234
	62.815
