# Supplementary material for: A ‘torn bag mechanism’ of small extracellular vesicle release via limiting membrane rupture of en bloc released amphisomes (amphiectosomes)
Source: eLife. 2025 Feb 7;13:RP95828. doi: 10.7554/eLife.95828 (PMC11805505; doi:10.7554/eLife.95828)
Supplement: Figure 3—source data 1. [file elife-95828-fig3-data1.xlsx]

## Sheet: Figure 3I
Ctrl	CytoB	Colch	Rapa	Chloro	Bafilo
49.33	53.33	43.48	28.15	90.38	108.33
69.89	82.76	34.06	32.68	111.11	102.13
56.45	41.3	32.56	25.35	76.69	162.9
56.11			33.49	132.76

## Sheet: Figure 3J
PalmGFP	PlamGFP-LC3RFP
220.6	209.457
113.231	192.37
313.754	382.351
431.294	391.862
221.849	168.46
173.993	148.884
